# Supplementary material for: Genome-wide profiling of histone H3K4-tri-methylation and gene expression in rice under drought stress
Source: Springer Nature journal article supplement (doi:10.1007/s11103-012-9990-2), 2012-11-29
Supplement: MOESM3 [file 11103_2012_9990_MOESM3_ESM.xls]

## Sheet: Drought
Table S2 Differentially modified genes during drought stress in rice.
1 Number of reads that mapped in 1Kb downstream of target gene's TSS regions.
2 Quantified modification levels of target gene's TSS regions.
3 If the modification level of target gene was 0, 0.001 was used to calculate the change ratio.
GeneID	CK-Modification1	D1-Modification	CK-ModifiedLevel2	D1-ModifiedLevel	log2 Ratio(D1/CK)3	Up-Down-Regulation(D1/CK)	P-value	FDR
LOC_Os09g16490	0	33	0	1.62033	10.6621	Up	7.88e-11	5.75e-10
LOC_Os01g12120	0	25	0	1.22752	10.2615	Up	2.21e-08	1.19e-07
LOC_Os04g54040	0	25	0	1.22752	10.2615	Up	2.21e-08	1.19e-07
LOC_Os04g17930	0	22	0	1.08022	10.0771	Up	1.83e-07	8.78e-07
LOC_Os09g13910	0	22	0	1.08022	10.0771	Up	1.83e-07	8.78e-07
LOC_Os01g25290	0	20	0	0.98202	9.93961	Up	7.49e-07	3.35e-06
LOC_Os05g09320	0	20	0	0.98202	9.93961	Up	7.49e-07	3.35e-06
LOC_Os02g53610	0	19	0	0.932919	9.86561	Up	1.52e-06	6.53e-06
LOC_Os02g24550	0	19	0	0.932919	9.86561	Up	1.52e-06	6.53e-06
LOC_Os10g32240	0	18	0	0.883818	9.78761	Up	3.07e-06	1.27e-05
LOC_Os04g44370	0	18	0	0.883818	9.78761	Up	3.07e-06	1.27e-05
LOC_Os08g40360	0	18	0	0.883818	9.78761	Up	3.07e-06	1.27e-05
LOC_Os03g38780	0	18	0	0.883818	9.78761	Up	3.07e-06	1.27e-05
LOC_Os11g02120	0	18	0	0.883818	9.78761	Up	3.07e-06	1.27e-05
LOC_Os01g25650	0	17	0	0.834717	9.70514	Up	6.2e-06	2.46e-05
LOC_Os12g27780	0	17	0	0.834717	9.70514	Up	6.2e-06	2.46e-05
LOC_Os01g60580	0	17	0	0.834717	9.70514	Up	6.2e-06	2.46e-05
LOC_Os01g39570	0	17	0	0.834717	9.70514	Up	6.2e-06	2.46e-05
LOC_Os09g25510	0	17	0	0.834717	9.70514	Up	6.2e-06	2.46e-05
LOC_Os11g26420	0	17	0	0.834717	9.70514	Up	6.2e-06	2.46e-05
LOC_Os07g25290	0	17	0	0.834717	9.70514	Up	6.2e-06	2.46e-05
LOC_Os02g50805	0	16	0	0.785616	9.61768	Up	1.26e-05	4.74e-05
LOC_Os03g53130	0	16	0	0.785616	9.61768	Up	1.26e-05	4.74e-05
LOC_Os12g13880	0	16	0	0.785616	9.61768	Up	1.26e-05	4.74e-05
LOC_Os07g16700	0	16	0	0.785616	9.61768	Up	1.26e-05	4.74e-05
LOC_Os06g37890	0	16	0	0.785616	9.61768	Up	1.26e-05	4.74e-05
LOC_Os09g03410	0	15	0	0.736515	9.52457	Up	2.54e-05	9.05e-05
LOC_Os11g20030	0	15	0	0.736515	9.52457	Up	2.54e-05	9.05e-05
LOC_Os01g42920	0	15	0	0.736515	9.52457	Up	2.54e-05	9.05e-05
LOC_Os04g48670	0	15	0	0.736515	9.52457	Up	2.54e-05	9.05e-05
LOC_Os04g22844	0	15	0	0.736515	9.52457	Up	2.54e-05	9.05e-05
LOC_Os03g32830	0	15	0	0.736515	9.52457	Up	2.54e-05	9.05e-05
LOC_Os04g44000	0	15	0	0.736515	9.52457	Up	2.54e-05	9.05e-05
LOC_Os07g25110	0	14	0	0.687414	9.42504	Up	5.14e-05	0.000170114
LOC_Os11g35762	0	14	0	0.687414	9.42504	Up	5.14e-05	0.000170103
LOC_Os06g24270	0	14	0	0.687414	9.42504	Up	5.14e-05	0.000170093
LOC_Os04g40350	0	14	0	0.687414	9.42504	Up	5.14e-05	0.000170083
LOC_Os07g01350	0	14	0	0.687414	9.42504	Up	5.14e-05	0.000170072
LOC_Os02g18900	0	14	0	0.687414	9.42504	Up	5.14e-05	0.000170062
LOC_Os01g27000	0	14	0	0.687414	9.42504	Up	5.14e-05	0.000170052
LOC_Os02g18890	0	14	0	0.687414	9.42504	Up	5.14e-05	0.000170041
LOC_Os08g26120	0	14	0	0.687414	9.42504	Up	5.14e-05	0.000170031
LOC_Os11g01090	0	14	0	0.687414	9.42504	Up	5.14e-05	0.000170021
LOC_Os12g23130	0	14	0	0.687414	9.42504	Up	5.14e-05	0.00017001
LOC_Os01g43820	0	13	0	0.638313	9.31812	Up	0.000103939	0.000317794
LOC_Os09g03170	0	13	0	0.638313	9.31812	Up	0.000103939	0.000317776
LOC_Os12g22250	0	13	0	0.638313	9.31812	Up	0.000103939	0.000317758
LOC_Os04g11210	0	13	0	0.638313	9.31812	Up	0.000103939	0.000317741
LOC_Os10g09320	0	13	0	0.638313	9.31812	Up	0.000103939	0.000317723
LOC_Os10g29930	0	13	0	0.638313	9.31812	Up	0.000103939	0.000317705
LOC_Os01g16740	0	13	0	0.638313	9.31812	Up	0.000103939	0.000317687
LOC_Os05g32920	0	13	0	0.638313	9.31812	Up	0.000103939	0.000317669
LOC_Os04g21960	0	13	0	0.638313	9.31812	Up	0.000103939	0.000317651
LOC_Os05g17950	0	13	0	0.638313	9.31812	Up	0.000103939	0.000317633
LOC_Os06g11870	0	12	0	0.589212	9.20264	Up	0.00021028	0.00059362
LOC_Os04g16745	0	12	0	0.589212	9.20264	Up	0.00021028	0.000593589
LOC_Os02g24628	0	12	0	0.589212	9.20264	Up	0.00021028	0.000593558
LOC_Os07g22280	0	12	0	0.589212	9.20264	Up	0.00021028	0.000593528
LOC_Os04g54170	0	12	0	0.589212	9.20264	Up	0.00021028	0.000593497
LOC_Os01g45220	0	12	0	0.589212	9.20264	Up	0.00021028	0.000593466
LOC_Os07g11600	0	12	0	0.589212	9.20264	Up	0.00021028	0.000593435
LOC_Os03g16190	0	12	0	0.589212	9.20264	Up	0.00021028	0.000593405
LOC_Os01g35820	0	12	0	0.589212	9.20264	Up	0.00021028	0.000593374
LOC_Os02g40520	0	12	0	0.589212	9.20264	Up	0.00021028	0.000593343
LOC_Os12g13980	0	12	0	0.589212	9.20264	Up	0.00021028	0.000593312
LOC_Os02g33920	0	12	0	0.589212	9.20264	Up	0.00021028	0.000593281
LOC_Os03g62800	0	12	0	0.589212	9.20264	Up	0.00021028	0.000593251
LOC_Os04g59180	0	12	0	0.589212	9.20264	Up	0.00021028	0.00059322
LOC_Os01g04005	2	54	0.0959845	2.65145	4.78784	Up	0.000117855	0.000354307
LOC_Os04g19440	2	35	0.0959845	1.71853	4.16223	Up	0.000117858	0.000354298
LOC_Os01g41460	2	34	0.0959845	1.66943	4.12041	Up	0.000117862	0.000354289
LOC_Os08g19440	2	34	0.0959845	1.66943	4.12041	Up	0.000117862	0.000354269
LOC_Os12g03610	2	33	0.0959845	1.62033	4.07734	Up	0.000117868	0.000354269
LOC_Os11g30860	2	33	0.0959845	1.62033	4.07734	Up	0.000117868	0.000354249
LOC_Os01g64710	2	33	0.0959845	1.62033	4.07734	Up	0.000117868	0.00035423
LOC_Os11g05830	2	33	0.0959845	1.62033	4.07734	Up	0.000117868	0.00035421
LOC_Os07g29100	2	32	0.0959845	1.57123	4.03295	Up	0.00011788	0.000354227
LOC_Os12g33720	2	32	0.0959845	1.57123	4.03295	Up	0.00011788	0.000354208
LOC_Os12g35460	2	32	0.0959845	1.57123	4.03295	Up	0.00011788	0.000354188
LOC_Os10g19030	2	32	0.0959845	1.57123	4.03295	Up	0.00011788	0.000354169
LOC_Os05g48280	3	46	0.143977	2.25865	3.97155	Up	7.61e-05	0.000241089
LOC_Os02g20920	2	30	0.0959845	1.47303	3.93984	Up	0.000117948	0.000354353
LOC_Os02g54850	2	30	0.0959845	1.47303	3.93984	Up	0.000117948	0.000354334
LOC_Os11g08225	2	30	0.0959845	1.47303	3.93984	Up	0.000117948	0.000354314
LOC_Os10g40350	3	44	0.143977	2.16044	3.90742	Up	7.61e-05	0.000241075
LOC_Os08g19600	2	29	0.0959845	1.42393	3.89093	Up	0.000118033	0.000354549
LOC_Os07g49340	2	29	0.0959845	1.42393	3.89093	Up	0.000118033	0.000354529
LOC_Os08g28650	2	29	0.0959845	1.42393	3.89093	Up	0.000118033	0.00035451
LOC_Os05g34870	2	28	0.0959845	1.37483	3.84031	Up	0.000118194	0.000354972
LOC_Os08g30320	2	28	0.0959845	1.37483	3.84031	Up	0.000118194	0.000354953
LOC_Os12g21680	2	28	0.0959845	1.37483	3.84031	Up	0.000118194	0.000354933
LOC_Os06g09010	2	28	0.0959845	1.37483	3.84031	Up	0.000118194	0.000354914
LOC_Os03g32260	2	28	0.0959845	1.37483	3.84031	Up	0.000118194	0.000354894
LOC_Os02g33880	3	41	0.143977	2.01314	3.80554	Up	7.61e-05	0.000241063
LOC_Os09g10330	2	27	0.0959845	1.32573	3.78784	Up	0.000118498	0.000355787
LOC_Os10g09630	2	27	0.0959845	1.32573	3.78784	Up	0.000118498	0.000355767
LOC_Os11g22890	2	27	0.0959845	1.32573	3.78784	Up	0.000118498	0.000355748
LOC_Os03g16750	3	39	0.143977	1.91494	3.73339	Up	7.61e-05	0.000241053
LOC_Os12g06400	3	39	0.143977	1.91494	3.73339	Up	7.61e-05	0.000241039
LOC_Os06g01120	2	26	0.0959845	1.27663	3.73339	Up	0.000119071	0.000357372
LOC_Os07g19200	2	26	0.0959845	1.27663	3.73339	Up	0.000119071	0.000357352
LOC_Os09g21840	2	26	0.0959845	1.27663	3.73339	Up	0.000119071	0.000357332
LOC_Os04g17200	2	26	0.0959845	1.27663	3.73339	Up	0.000119071	0.000357313
LOC_Os03g28000	2	26	0.0959845	1.27663	3.73339	Up	0.000119071	0.000357293
LOC_Os01g28460	2	26	0.0959845	1.27663	3.73339	Up	0.000119071	0.000357273
LOC_Os01g37250	3	38	0.143977	1.86584	3.69592	Up	7.61e-05	0.000241031
LOC_Os10g09820	2	25	0.0959845	1.22752	3.67681	Up	0.000120152	0.000360298
LOC_Os07g26595	2	25	0.0959845	1.22752	3.67681	Up	0.000120152	0.000360278
LOC_Os12g19930	2	25	0.0959845	1.22752	3.67681	Up	0.000120152	0.000360258
LOC_Os08g08510	2	25	0.0959845	1.22752	3.67681	Up	0.000120152	0.000360238
LOC_Os07g43090	2	25	0.0959845	1.22752	3.67681	Up	0.000120152	0.000360218
LOC_Os07g38670	2	25	0.0959845	1.22752	3.67681	Up	0.000120152	0.000360198
LOC_Os10g20980	2	25	0.0959845	1.22752	3.67681	Up	0.000120152	0.000360179
LOC_Os09g08890	5	62	0.239961	3.04426	3.66522	Up	2.92e-05	0.000102742
LOC_Os07g12280	3	37	0.143977	1.81674	3.65744	Up	7.61e-05	0.000241027
LOC_Os05g04810	3	37	0.143977	1.81674	3.65744	Up	7.61e-05	0.000241013
LOC_Os01g24420	2	24	0.0959845	1.17842	3.61791	Up	0.000122183	0.000365902
LOC_Os07g13210	2	24	0.0959845	1.17842	3.61791	Up	0.000122183	0.000365882
LOC_Os03g14060	2	24	0.0959845	1.17842	3.61791	Up	0.000122183	0.000365862
LOC_Os10g11990	2	24	0.0959845	1.17842	3.61791	Up	0.000122183	0.000365842
LOC_Os03g43030	2	24	0.0959845	1.17842	3.61791	Up	0.000122183	0.000365822
LOC_Os05g28580	2	24	0.0959845	1.17842	3.61791	Up	0.000122183	0.000365801
LOC_Os04g06200	2	24	0.0959845	1.17842	3.61791	Up	0.000122183	0.000365781
LOC_Os04g20150	3	36	0.143977	1.76764	3.61791	Up	7.61e-05	0.000241004
LOC_Os07g07940	3	35	0.143977	1.71853	3.57727	Up	7.61e-05	0.000241026
LOC_Os07g23020	3	35	0.143977	1.71853	3.57727	Up	7.61e-05	0.000241012
LOC_Os02g08340	3	35	0.143977	1.71853	3.57727	Up	7.61e-05	0.000240998
LOC_Os01g31990	3	35	0.143977	1.71853	3.57727	Up	7.61e-05	0.000240984
LOC_Os10g05810	2	23	0.0959845	1.12932	3.55651	Up	0.000125986	0.000376464
LOC_Os01g35870	2	23	0.0959845	1.12932	3.55651	Up	0.000125986	0.000376443
LOC_Os08g12150	2	23	0.0959845	1.12932	3.55651	Up	0.000125986	0.000376423
LOC_Os10g09470	2	23	0.0959845	1.12932	3.55651	Up	0.000125986	0.000376402
LOC_Os04g23960	2	23	0.0959845	1.12932	3.55651	Up	0.000125986	0.000376381
LOC_Os08g19890	2	23	0.0959845	1.12932	3.55651	Up	0.000125986	0.000376361
LOC_Os05g13750	2	23	0.0959845	1.12932	3.55651	Up	0.000125986	0.00037634
LOC_Os09g01390	2	23	0.0959845	1.12932	3.55651	Up	0.000125986	0.000376319
LOC_Os03g50800	2	23	0.0959845	1.12932	3.55651	Up	0.000125986	0.000376299
LOC_Os12g24920	2	23	0.0959845	1.12932	3.55651	Up	0.000125986	0.000376278
LOC_Os08g32030	2	23	0.0959845	1.12932	3.55651	Up	0.000125986	0.000376257
LOC_Os09g20160	2	23	0.0959845	1.12932	3.55651	Up	0.000125986	0.000376237
LOC_Os07g13550	2	23	0.0959845	1.12932	3.55651	Up	0.000125986	0.000376216
LOC_Os07g17790	2	23	0.0959845	1.12932	3.55651	Up	0.000125986	0.000376195
LOC_Os04g21030	3	34	0.143977	1.66943	3.53545	Up	7.61e-05	0.000241024
LOC_Os01g65340	3	33	0.143977	1.62033	3.49238	Up	7.61e-05	0.000241137
LOC_Os12g24950	3	33	0.143977	1.62033	3.49238	Up	7.61e-05	0.000241123
LOC_Os01g33324	2	22	0.0959845	1.08022	3.49238	Up	0.000133089	0.000394632
LOC_Os08g28784	2	22	0.0959845	1.08022	3.49238	Up	0.000133089	0.000394611
LOC_Os08g15320	2	22	0.0959845	1.08022	3.49238	Up	0.000133089	0.000394589
LOC_Os04g16660	2	22	0.0959845	1.08022	3.49238	Up	0.000133089	0.000394568
LOC_Os02g15770	2	22	0.0959845	1.08022	3.49238	Up	0.000133089	0.000394546
LOC_Os08g22250	2	22	0.0959845	1.08022	3.49238	Up	0.000133089	0.000394525
LOC_Os10g03040	2	22	0.0959845	1.08022	3.49238	Up	0.000133089	0.000394503
LOC_Os05g20830	2	22	0.0959845	1.08022	3.49238	Up	0.000133089	0.000394482
LOC_Os11g17880	2	22	0.0959845	1.08022	3.49238	Up	0.000133089	0.00039446
LOC_Os11g20010	2	22	0.0959845	1.08022	3.49238	Up	0.000133089	0.000394439
LOC_Os05g14720	2	22	0.0959845	1.08022	3.49238	Up	0.000133089	0.000394417
LOC_Os10g16760	2	22	0.0959845	1.08022	3.49238	Up	0.000133089	0.000394396
LOC_Os05g51730	2	22	0.0959845	1.08022	3.49238	Up	0.000133089	0.000394374
LOC_Os02g13930	2	22	0.0959845	1.08022	3.49238	Up	0.000133089	0.000394353
LOC_Os07g27920	2	22	0.0959845	1.08022	3.49238	Up	0.000133089	0.000394331
LOC_Os12g15140	2	22	0.0959845	1.08022	3.49238	Up	0.000133089	0.00039431
LOC_Os01g31090	2	22	0.0959845	1.08022	3.49238	Up	0.000133089	0.000394288
LOC_Os01g26330	2	22	0.0959845	1.08022	3.49238	Up	0.000133089	0.000394267
LOC_Os12g22690	2	22	0.0959845	1.08022	3.49238	Up	0.000133089	0.000394246
LOC_Os11g27870	2	22	0.0959845	1.08022	3.49238	Up	0.000133089	0.000394224
LOC_Os06g07710	2	22	0.0959845	1.08022	3.49238	Up	0.000133089	0.000394203
LOC_Os03g41500	2	22	0.0959845	1.08022	3.49238	Up	0.000133089	0.000394181
LOC_Os01g65770	4	44	0.191969	2.16044	3.49238	Up	4.8e-05	0.000161158
LOC_Os04g45740	4	43	0.191969	2.11134	3.45921	Up	4.8e-05	0.000161149
LOC_Os08g10680	3	32	0.143977	1.57123	3.44799	Up	7.62e-05	0.000241331
LOC_Os04g01190	3	32	0.143977	1.57123	3.44799	Up	7.62e-05	0.000241317
LOC_Os11g23940	3	32	0.143977	1.57123	3.44799	Up	7.62e-05	0.000241303
LOC_Os08g12970	3	32	0.143977	1.57123	3.44799	Up	7.62e-05	0.000241288
LOC_Os07g24320	3	32	0.143977	1.57123	3.44799	Up	7.62e-05	0.000241274
LOC_Os07g15100	2	21	0.0959845	1.03112	3.42527	Up	0.00014631	0.000429202
LOC_Os04g22190	2	21	0.0959845	1.03112	3.42527	Up	0.00014631	0.000429179
LOC_Os09g20450	2	21	0.0959845	1.03112	3.42527	Up	0.00014631	0.000429155
LOC_Os11g09910	2	21	0.0959845	1.03112	3.42527	Up	0.00014631	0.000429132
LOC_Os03g40725	2	21	0.0959845	1.03112	3.42527	Up	0.00014631	0.000429109
LOC_Os04g53420	2	21	0.0959845	1.03112	3.42527	Up	0.00014631	0.000429086
LOC_Os02g46010	2	21	0.0959845	1.03112	3.42527	Up	0.00014631	0.000429063
LOC_Os09g16830	2	21	0.0959845	1.03112	3.42527	Up	0.00014631	0.00042904
LOC_Os03g14349	2	21	0.0959845	1.03112	3.42527	Up	0.00014631	0.000429017
LOC_Os04g05630	2	21	0.0959845	1.03112	3.42527	Up	0.00014631	0.000428994
LOC_Os03g18800	2	21	0.0959845	1.03112	3.42527	Up	0.00014631	0.00042897
LOC_Os06g35600	2	21	0.0959845	1.03112	3.42527	Up	0.00014631	0.000428947
LOC_Os11g27660	2	21	0.0959845	1.03112	3.42527	Up	0.00014631	0.000428924
LOC_Os09g01110	2	21	0.0959845	1.03112	3.42527	Up	0.00014631	0.000428901
LOC_Os10g03000	2	21	0.0959845	1.03112	3.42527	Up	0.00014631	0.000428878
LOC_Os01g19040	2	21	0.0959845	1.03112	3.42527	Up	0.00014631	0.000428855
LOC_Os11g01930	2	21	0.0959845	1.03112	3.42527	Up	0.00014631	0.000428832
LOC_Os12g26160	2	21	0.0959845	1.03112	3.42527	Up	0.00014631	0.000428809
LOC_Os04g32640	2	21	0.0959845	1.03112	3.42527	Up	0.00014631	0.000428786
LOC_Os05g34370	2	21	0.0959845	1.03112	3.42527	Up	0.00014631	0.000428762
LOC_Os09g08880	4	42	0.191969	2.06224	3.42527	Up	4.8e-05	0.000161142
LOC_Os03g40630	4	42	0.191969	2.06224	3.42527	Up	4.8e-05	0.000161132
LOC_Os02g38880	4	42	0.191969	2.06224	3.42527	Up	4.8e-05	0.000161122
LOC_Os12g33140	3	31	0.143977	1.52213	3.40218	Up	7.64e-05	0.000241697
LOC_Os01g29290	3	31	0.143977	1.52213	3.40218	Up	7.64e-05	0.000241683
LOC_Os10g05160	3	31	0.143977	1.52213	3.40218	Up	7.64e-05	0.000241669
LOC_Os11g22180	3	31	0.143977	1.52213	3.40218	Up	7.64e-05	0.000241655
LOC_Os09g08290	3	31	0.143977	1.52213	3.40218	Up	7.64e-05	0.000241641
LOC_Os02g26530	3	31	0.143977	1.52213	3.40218	Up	7.64e-05	0.000241627
LOC_Os08g18974	12	122	0.575907	5.99032	3.37873	Up	5.51e-07	2.5e-06
LOC_Os07g18410	2	20	0.0959845	0.98202	3.35488	Up	0.000170827	0.000492781
LOC_Os05g24820	2	20	0.0959845	0.98202	3.35488	Up	0.000170827	0.000492755
LOC_Os03g49340	2	20	0.0959845	0.98202	3.35488	Up	0.000170827	0.000492728
LOC_Os02g29620	2	20	0.0959845	0.98202	3.35488	Up	0.000170827	0.000492702
LOC_Os03g44510	2	20	0.0959845	0.98202	3.35488	Up	0.000170827	0.000492676
LOC_Os02g25410	2	20	0.0959845	0.98202	3.35488	Up	0.000170827	0.00049265
LOC_Os04g17220	2	20	0.0959845	0.98202	3.35488	Up	0.000170827	0.000492624
LOC_Os04g21010	2	20	0.0959845	0.98202	3.35488	Up	0.000170827	0.000492598
LOC_Os08g02830	2	20	0.0959845	0.98202	3.35488	Up	0.000170827	0.000492572
LOC_Os05g37560	2	20	0.0959845	0.98202	3.35488	Up	0.000170827	0.000492546
LOC_Os07g40540	2	20	0.0959845	0.98202	3.35488	Up	0.000170827	0.00049252
LOC_Os04g10120	2	20	0.0959845	0.98202	3.35488	Up	0.000170827	0.000492493
LOC_Os07g11840	2	20	0.0959845	0.98202	3.35488	Up	0.000170827	0.000492467
LOC_Os08g19640	2	20	0.0959845	0.98202	3.35488	Up	0.000170827	0.000492441
LOC_Os04g01210	2	20	0.0959845	0.98202	3.35488	Up	0.000170827	0.000492415
LOC_Os12g09164	2	20	0.0959845	0.98202	3.35488	Up	0.000170827	0.000492389
LOC_Os01g35770	3	30	0.143977	1.47303	3.35488	Up	7.66e-05	0.000242407
LOC_Os04g48900	3	30	0.143977	1.47303	3.35488	Up	7.66e-05	0.000242393
LOC_Os04g11690	3	30	0.143977	1.47303	3.35488	Up	7.66e-05	0.000242379
LOC_Os08g19730	3	30	0.143977	1.47303	3.35488	Up	7.66e-05	0.000242365
LOC_Os04g44380	3	30	0.143977	1.47303	3.35488	Up	7.66e-05	0.000242351
LOC_Os12g10420	3	30	0.143977	1.47303	3.35488	Up	7.66e-05	0.000242336
LOC_Os12g10010	3	30	0.143977	1.47303	3.35488	Up	7.66e-05	0.000242322
LOC_Os04g22420	3	30	0.143977	1.47303	3.35488	Up	7.66e-05	0.000242308
LOC_Os12g40800	3	30	0.143977	1.47303	3.35488	Up	7.66e-05	0.000242294
LOC_Os07g22120	3	30	0.143977	1.47303	3.35488	Up	7.66e-05	0.00024228
LOC_Os11g24520	3	30	0.143977	1.47303	3.35488	Up	7.66e-05	0.000242266
LOC_Os11g29180	3	30	0.143977	1.47303	3.35488	Up	7.66e-05	0.000242252
LOC_Os11g37180	4	40	0.191969	1.96404	3.35488	Up	4.8e-05	0.000161127
LOC_Os12g22530	3	30	0.143977	1.47303	3.35488	Up	7.66e-05	0.000242238
LOC_Os02g31950	3	30	0.143977	1.47303	3.35488	Up	7.66e-05	0.000242224
LOC_Os04g23920	3	30	0.143977	1.47303	3.35488	Up	7.66e-05	0.00024221
LOC_Os03g28289	5	49	0.239961	2.40595	3.32573	Up	2.92e-05	0.000102736
LOC_Os11g40315	3	29	0.143977	1.42393	3.30597	Up	7.71e-05	0.000243613
LOC_Os07g34100	3	29	0.143977	1.42393	3.30597	Up	7.71e-05	0.000243599
LOC_Os05g23270	3	29	0.143977	1.42393	3.30597	Up	7.71e-05	0.000243585
LOC_Os07g25320	3	29	0.143977	1.42393	3.30597	Up	7.71e-05	0.000243571
LOC_Os10g01900	3	29	0.143977	1.42393	3.30597	Up	7.71e-05	0.000243557
LOC_Os10g19914	3	29	0.143977	1.42393	3.30597	Up	7.71e-05	0.000243542
LOC_Os11g19110	3	29	0.143977	1.42393	3.30597	Up	7.71e-05	0.000243528
LOC_Os12g24970	3	29	0.143977	1.42393	3.30597	Up	7.71e-05	0.000243514
LOC_Os12g14630	3	29	0.143977	1.42393	3.30597	Up	7.71e-05	0.0002435
LOC_Os06g36720	3	29	0.143977	1.42393	3.30597	Up	7.71e-05	0.000243486
LOC_Os12g15950	3	29	0.143977	1.42393	3.30597	Up	7.71e-05	0.000243472
LOC_Os11g25070	3	29	0.143977	1.42393	3.30597	Up	7.71e-05	0.000243458
LOC_Os04g29380	2	19	0.0959845	0.932919	3.28088	Up	0.000216116	0.00060839
LOC_Os07g16190	2	19	0.0959845	0.932919	3.28088	Up	0.000216116	0.000608359
LOC_Os01g29370	2	19	0.0959845	0.932919	3.28088	Up	0.000216116	0.000608327
LOC_Os12g34210	2	19	0.0959845	0.932919	3.28088	Up	0.000216116	0.000608296
LOC_Os03g33730	2	19	0.0959845	0.932919	3.28088	Up	0.000216116	0.000608264
LOC_Os07g42670	2	19	0.0959845	0.932919	3.28088	Up	0.000216116	0.000608233
LOC_Os03g45810	2	19	0.0959845	0.932919	3.28088	Up	0.000216116	0.000608201
LOC_Os01g24320	2	19	0.0959845	0.932919	3.28088	Up	0.000216116	0.00060817
LOC_Os05g06170	2	19	0.0959845	0.932919	3.28088	Up	0.000216116	0.000608139
LOC_Os06g29730	2	19	0.0959845	0.932919	3.28088	Up	0.000216116	0.000608107
LOC_Os07g16100	2	19	0.0959845	0.932919	3.28088	Up	0.000216116	0.000608076
LOC_Os08g15730	2	19	0.0959845	0.932919	3.28088	Up	0.000216116	0.000608044
LOC_Os08g31370	2	19	0.0959845	0.932919	3.28088	Up	0.000216116	0.000608013
LOC_Os08g32050	2	19	0.0959845	0.932919	3.28088	Up	0.000216116	0.000607981
LOC_Os10g29920	2	19	0.0959845	0.932919	3.28088	Up	0.000216116	0.00060795
LOC_Os04g33340	2	19	0.0959845	0.932919	3.28088	Up	0.000216116	0.000607918
LOC_Os01g35070	2	19	0.0959845	0.932919	3.28088	Up	0.000216116	0.000607887
LOC_Os07g23485	2	19	0.0959845	0.932919	3.28088	Up	0.000216116	0.000607856
LOC_Os06g24010	2	19	0.0959845	0.932919	3.28088	Up	0.000216116	0.000607824
LOC_Os05g16810	2	19	0.0959845	0.932919	3.28088	Up	0.000216116	0.000607793
LOC_Os12g08520	2	19	0.0959845	0.932919	3.28088	Up	0.000216116	0.000607761
LOC_Os03g32870	2	19	0.0959845	0.932919	3.28088	Up	0.000216116	0.00060773
LOC_Os05g12060	2	19	0.0959845	0.932919	3.28088	Up	0.000216116	0.000607698
LOC_Os08g11530	2	19	0.0959845	0.932919	3.28088	Up	0.000216116	0.000607667
LOC_Os08g04750	2	19	0.0959845	0.932919	3.28088	Up	0.000216116	0.000607636
LOC_Os03g56640	5	47	0.239961	2.30775	3.26561	Up	2.92e-05	0.00010273
LOC_Os04g56309	19	178	0.911853	8.73998	3.26076	Up	7.45e-09	4.24e-08
LOC_Os06g48270	3	28	0.143977	1.37483	3.25534	Up	7.8e-05	0.000246065
LOC_Os01g30962	3	28	0.143977	1.37483	3.25534	Up	7.8e-05	0.00024605
LOC_Os12g36020	3	28	0.143977	1.37483	3.25534	Up	7.8e-05	0.000246036
LOC_Os12g07200	3	28	0.143977	1.37483	3.25534	Up	7.8e-05	0.000246022
LOC_Os11g33134	3	28	0.143977	1.37483	3.25534	Up	7.8e-05	0.000246008
LOC_Os11g19970	3	28	0.143977	1.37483	3.25534	Up	7.8e-05	0.000245993
LOC_Os06g47050	4	37	0.191969	1.81674	3.2424	Up	4.81e-05	0.000161204
LOC_Os09g26520	4	37	0.191969	1.81674	3.2424	Up	4.81e-05	0.000161194
LOC_Os04g58280	4	37	0.191969	1.81674	3.2424	Up	4.81e-05	0.000161184
LOC_Os10g06090	4	37	0.191969	1.81674	3.2424	Up	4.81e-05	0.000161174
LOC_Os12g01800	4	37	0.191969	1.81674	3.2424	Up	4.81e-05	0.000161164
LOC_Os08g06478	5	45	0.239961	2.20954	3.20288	Up	2.92e-05	0.000102727
LOC_Os12g09030	3	27	0.143977	1.32573	3.20288	Up	7.95e-05	0.000250729
LOC_Os05g26700	3	27	0.143977	1.32573	3.20288	Up	7.95e-05	0.000250714
LOC_Os01g70750	3	27	0.143977	1.32573	3.20288	Up	7.95e-05	0.0002507
LOC_Os12g30900	3	27	0.143977	1.32573	3.20288	Up	7.95e-05	0.000250685
LOC_Os02g33280	3	27	0.143977	1.32573	3.20288	Up	7.95e-05	0.000250671
LOC_Os03g23060	3	27	0.143977	1.32573	3.20288	Up	7.95e-05	0.000250656
LOC_Os04g27094	3	27	0.143977	1.32573	3.20288	Up	7.95e-05	0.000250642
LOC_Os05g15210	3	27	0.143977	1.32573	3.20288	Up	7.95e-05	0.000250627
LOC_Os05g21050	3	27	0.143977	1.32573	3.20288	Up	7.95e-05	0.000250613
LOC_Os11g42830	3	27	0.143977	1.32573	3.20288	Up	7.95e-05	0.000250598
LOC_Os02g17120	3	27	0.143977	1.32573	3.20288	Up	7.95e-05	0.000250584
LOC_Os04g27270	3	27	0.143977	1.32573	3.20288	Up	7.95e-05	0.000250569
LOC_Os08g08450	3	27	0.143977	1.32573	3.20288	Up	7.95e-05	0.000250555
LOC_Os09g11880	3	27	0.143977	1.32573	3.20288	Up	7.95e-05	0.00025054
LOC_Os04g13650	3	27	0.143977	1.32573	3.20288	Up	7.95e-05	0.000250526
LOC_Os11g31410	2	18	0.0959845	0.883818	3.20288	Up	0.00029941	0.000813733
LOC_Os12g17980	2	18	0.0959845	0.883818	3.20288	Up	0.00029941	0.000813693
LOC_Os08g24500	2	18	0.0959845	0.883818	3.20288	Up	0.00029941	0.000813652
LOC_Os09g11420	2	18	0.0959845	0.883818	3.20288	Up	0.00029941	0.000813612
LOC_Os12g32430	2	18	0.0959845	0.883818	3.20288	Up	0.00029941	0.000813571
LOC_Os10g04250	2	18	0.0959845	0.883818	3.20288	Up	0.00029941	0.00081353
LOC_Os08g26970	2	18	0.0959845	0.883818	3.20288	Up	0.00029941	0.00081349
LOC_Os09g01280	2	18	0.0959845	0.883818	3.20288	Up	0.00029941	0.000813449
LOC_Os03g45490	2	18	0.0959845	0.883818	3.20288	Up	0.00029941	0.000813408
LOC_Os08g37540	2	18	0.0959845	0.883818	3.20288	Up	0.00029941	0.000813368
LOC_Os04g29320	2	18	0.0959845	0.883818	3.20288	Up	0.00029941	0.000813327
LOC_Os02g29920	2	18	0.0959845	0.883818	3.20288	Up	0.00029941	0.000813287
LOC_Os03g39700	2	18	0.0959845	0.883818	3.20288	Up	0.00029941	0.000813246
LOC_Os07g47020	2	18	0.0959845	0.883818	3.20288	Up	0.00029941	0.000813205
LOC_Os08g32020	2	18	0.0959845	0.883818	3.20288	Up	0.00029941	0.000813165
LOC_Os10g05700	2	18	0.0959845	0.883818	3.20288	Up	0.00029941	0.000813124
LOC_Os08g21490	2	18	0.0959845	0.883818	3.20288	Up	0.00029941	0.000813084
LOC_Os05g17960	2	18	0.0959845	0.883818	3.20288	Up	0.00029941	0.000813043
LOC_Os01g25839	2	18	0.0959845	0.883818	3.20288	Up	0.00029941	0.000813002
LOC_Os09g27180	2	18	0.0959845	0.883818	3.20288	Up	0.00029941	0.000812962
LOC_Os06g22350	2	18	0.0959845	0.883818	3.20288	Up	0.00029941	0.000812921
LOC_Os04g24880	2	18	0.0959845	0.883818	3.20288	Up	0.00029941	0.000812881
LOC_Os12g25950	2	18	0.0959845	0.883818	3.20288	Up	0.00029941	0.00081284
LOC_Os09g07200	2	18	0.0959845	0.883818	3.20288	Up	0.00029941	0.0008128
LOC_Os06g24680	2	18	0.0959845	0.883818	3.20288	Up	0.00029941	0.000812759
LOC_Os10g03180	2	18	0.0959845	0.883818	3.20288	Up	0.00029941	0.000812718
LOC_Os05g36240	2	18	0.0959845	0.883818	3.20288	Up	0.00029941	0.000812678
LOC_Os08g37090	2	18	0.0959845	0.883818	3.20288	Up	0.00029941	0.000812637
LOC_Os01g36120	2	18	0.0959845	0.883818	3.20288	Up	0.00029941	0.000812597
LOC_Os08g22680	2	18	0.0959845	0.883818	3.20288	Up	0.00029941	0.000812556
LOC_Os01g28894	2	18	0.0959845	0.883818	3.20288	Up	0.00029941	0.000812516
LOC_Os05g37230	2	18	0.0959845	0.883818	3.20288	Up	0.00029941	0.000812475
LOC_Os02g57230	2	18	0.0959845	0.883818	3.20288	Up	0.00029941	0.000812435
LOC_Os05g10970	2	18	0.0959845	0.883818	3.20288	Up	0.00029941	0.000812394
LOC_Os01g38270	2	18	0.0959845	0.883818	3.20288	Up	0.00029941	0.000812354
LOC_Os01g40780	2	18	0.0959845	0.883818	3.20288	Up	0.00029941	0.000812313
LOC_Os03g13920	2	18	0.0959845	0.883818	3.20288	Up	0.00029941	0.000812273
LOC_Os08g23770	2	18	0.0959845	0.883818	3.20288	Up	0.00029941	0.000812232
LOC_Os01g24640	2	18	0.0959845	0.883818	3.20288	Up	0.00029941	0.000812192
LOC_Os07g16640	2	18	0.0959845	0.883818	3.20288	Up	0.00029941	0.000812151
LOC_Os01g18390	4	36	0.191969	1.76764	3.20288	Up	4.81e-05	0.000160806
LOC_Os05g27740	4	36	0.191969	1.76764	3.20288	Up	4.81e-05	0.000160796
LOC_Os02g19400	4	36	0.191969	1.76764	3.20288	Up	4.81e-05	0.000160786
LOC_Os07g27100	4	36	0.191969	1.76764	3.20288	Up	4.81e-05	0.000160776
LOC_Os05g00988	4	36	0.191969	1.76764	3.20288	Up	4.81e-05	0.000160766
LOC_Os10g01260	4	36	0.191969	1.76764	3.20288	Up	4.81e-05	0.000160757
LOC_Os04g03020	4	36	0.191969	1.76764	3.20288	Up	4.81e-05	0.000160747
LOC_Os06g02070	4	36	0.191969	1.76764	3.20288	Up	4.81e-05	0.000160737
LOC_Os01g24710	18	159	0.863861	7.80706	3.17591	Up	1.39e-08	7.64e-08
LOC_Os07g42780	5	44	0.239961	2.16044	3.17045	Up	2.92e-05	0.000102724
LOC_Os12g23869	5	44	0.239961	2.16044	3.17045	Up	2.92e-05	0.000102718
LOC_Os03g46884	5	44	0.239961	2.16044	3.17045	Up	2.92e-05	0.000102711
LOC_Os01g27030	4	35	0.191969	1.71853	3.16223	Up	4.82e-05	0.000160911
LOC_Os01g10650	4	35	0.191969	1.71853	3.16223	Up	4.82e-05	0.000160901
LOC_Os07g08690	4	35	0.191969	1.71853	3.16223	Up	4.82e-05	0.000160891
LOC_Os02g26040	4	35	0.191969	1.71853	3.16223	Up	4.82e-05	0.000160881
LOC_Os07g24780	4	35	0.191969	1.71853	3.16223	Up	4.82e-05	0.000160871
LOC_Os06g46620	4	35	0.191969	1.71853	3.16223	Up	4.82e-05	0.000160861
LOC_Os01g58048	4	35	0.191969	1.71853	3.16223	Up	4.82e-05	0.000160852
LOC_Os08g13810	4	35	0.191969	1.71853	3.16223	Up	4.82e-05	0.000160842
LOC_Os01g51110	4	35	0.191969	1.71853	3.16223	Up	4.82e-05	0.000160832
LOC_Os08g35420	4	35	0.191969	1.71853	3.16223	Up	4.82e-05	0.000160822
LOC_Os04g17630	3	26	0.143977	1.27663	3.14843	Up	8.24e-05	0.000257948
LOC_Os11g40450	3	26	0.143977	1.27663	3.14843	Up	8.24e-05	0.000257933
LOC_Os01g31460	3	26	0.143977	1.27663	3.14843	Up	8.24e-05	0.000257918
LOC_Os03g13510	3	26	0.143977	1.27663	3.14843	Up	8.24e-05	0.000257904
LOC_Os04g16950	3	26	0.143977	1.27663	3.14843	Up	8.24e-05	0.000257889
LOC_Os04g01370	3	26	0.143977	1.27663	3.14843	Up	8.24e-05	0.000257874
LOC_Os01g69000	3	26	0.143977	1.27663	3.14843	Up	8.24e-05	0.000257859
LOC_Os01g46900	3	26	0.143977	1.27663	3.14843	Up	8.24e-05	0.000257844
LOC_Os10g24470	3	26	0.143977	1.27663	3.14843	Up	8.24e-05	0.00025783
LOC_Os04g10500	3	26	0.143977	1.27663	3.14843	Up	8.24e-05	0.000257815
LOC_Os05g38310	3	26	0.143977	1.27663	3.14843	Up	8.24e-05	0.0002578
LOC_Os06g32520	3	26	0.143977	1.27663	3.14843	Up	8.24e-05	0.000257785
LOC_Os01g31240	3	26	0.143977	1.27663	3.14843	Up	8.24e-05	0.00025777
LOC_Os02g20780	3	26	0.143977	1.27663	3.14843	Up	8.24e-05	0.000257755
LOC_Os03g20280	3	26	0.143977	1.27663	3.14843	Up	8.24e-05	0.000257741
LOC_Os11g25630	3	26	0.143977	1.27663	3.14843	Up	8.24e-05	0.000257726
LOC_Os06g20680	3	26	0.143977	1.27663	3.14843	Up	8.24e-05	0.000257711
LOC_Os01g38330	3	26	0.143977	1.27663	3.14843	Up	8.24e-05	0.000257696
LOC_Os01g36310	3	26	0.143977	1.27663	3.14843	Up	8.24e-05	0.000257681
LOC_Os11g11870	3	26	0.143977	1.27663	3.14843	Up	8.24e-05	0.000257667
LOC_Os07g28290	3	26	0.143977	1.27663	3.14843	Up	8.24e-05	0.000257652
LOC_Os07g24660	3	26	0.143977	1.27663	3.14843	Up	8.24e-05	0.000257637
LOC_Os02g04830	3	26	0.143977	1.27663	3.14843	Up	8.24e-05	0.000257622
LOC_Os09g16770	3	26	0.143977	1.27663	3.14843	Up	8.24e-05	0.000257607
LOC_Os06g30760	3	26	0.143977	1.27663	3.14843	Up	8.24e-05	0.000257593
LOC_Os05g25075	5	43	0.239961	2.11134	3.13729	Up	2.92e-05	0.000102712
LOC_Os11g07220	5	43	0.239961	2.11134	3.13729	Up	2.92e-05	0.000102705
LOC_Os03g15640	6	51	0.287954	2.50415	3.12041	Up	1.73e-05	6.37e-05
LOC_Os08g16500	4	34	0.191969	1.66943	3.12041	Up	4.83e-05	0.000161156
LOC_Os12g18660	4	34	0.191969	1.66943	3.12041	Up	4.83e-05	0.000161146
LOC_Os10g03080	4	34	0.191969	1.66943	3.12041	Up	4.83e-05	0.000161136
LOC_Os05g37870	4	34	0.191969	1.66943	3.12041	Up	4.83e-05	0.000161126
LOC_Os08g10160	4	34	0.191969	1.66943	3.12041	Up	4.83e-05	0.000161117
LOC_Os05g45520	4	34	0.191969	1.66943	3.12041	Up	4.83e-05	0.000161107
LOC_Os05g08190	4	34	0.191969	1.66943	3.12041	Up	4.83e-05	0.000161097
LOC_Os12g15780	5	42	0.239961	2.06224	3.10334	Up	2.92e-05	0.000102713
LOC_Os02g25640	5	42	0.239961	2.06224	3.10334	Up	2.92e-05	0.000102706
LOC_Os04g43200	61	511	2.92753	25.0906	3.09939	Up	5.15e-14	5.88e-13
LOC_Os10g10160	3	25	0.143977	1.22752	3.09184	Up	8.77e-05	0.000273223
LOC_Os10g06900	3	25	0.143977	1.22752	3.09184	Up	8.77e-05	0.000273208
LOC_Os09g07764	3	25	0.143977	1.22752	3.09184	Up	8.77e-05	0.000273192
LOC_Os07g18430	3	25	0.143977	1.22752	3.09184	Up	8.77e-05	0.000273177
LOC_Os01g19910	3	25	0.143977	1.22752	3.09184	Up	8.77e-05	0.000273161
LOC_Os07g09090	3	25	0.143977	1.22752	3.09184	Up	8.77e-05	0.000273145
LOC_Os06g32480	3	25	0.143977	1.22752	3.09184	Up	8.77e-05	0.00027313
LOC_Os11g23870	3	25	0.143977	1.22752	3.09184	Up	8.77e-05	0.000273114
LOC_Os11g31250	3	25	0.143977	1.22752	3.09184	Up	8.77e-05	0.000273098
LOC_Os04g32570	3	25	0.143977	1.22752	3.09184	Up	8.77e-05	0.000273083
LOC_Os12g18500	3	25	0.143977	1.22752	3.09184	Up	8.77e-05	0.000273067
LOC_Os11g16750	3	25	0.143977	1.22752	3.09184	Up	8.77e-05	0.000273051
LOC_Os02g29680	3	25	0.143977	1.22752	3.09184	Up	8.77e-05	0.000273036
LOC_Os04g22430	3	25	0.143977	1.22752	3.09184	Up	8.77e-05	0.00027302
LOC_Os02g21560	3	25	0.143977	1.22752	3.09184	Up	8.77e-05	0.000273005
LOC_Os06g28580	3	25	0.143977	1.22752	3.09184	Up	8.77e-05	0.000272989
LOC_Os04g06020	3	25	0.143977	1.22752	3.09184	Up	8.77e-05	0.000272973
LOC_Os12g27670	3	25	0.143977	1.22752	3.09184	Up	8.77e-05	0.000272958
LOC_Os03g38310	3	25	0.143977	1.22752	3.09184	Up	8.77e-05	0.000272942
LOC_Os01g28670	3	25	0.143977	1.22752	3.09184	Up	8.77e-05	0.000272927
LOC_Os04g28970	3	25	0.143977	1.22752	3.09184	Up	8.77e-05	0.000272911
LOC_Os03g26550	3	25	0.143977	1.22752	3.09184	Up	8.77e-05	0.000272895
LOC_Os12g27430	4	33	0.191969	1.62033	3.07734	Up	4.85e-05	0.000161719
LOC_Os05g46730	4	33	0.191969	1.62033	3.07734	Up	4.85e-05	0.000161709
LOC_Os04g20800	4	33	0.191969	1.62033	3.07734	Up	4.85e-05	0.000161699
LOC_Os01g72390	4	33	0.191969	1.62033	3.07734	Up	4.85e-05	0.000161689
LOC_Os08g34080	4	33	0.191969	1.62033	3.07734	Up	4.85e-05	0.000161679
LOC_Os04g22930	4	33	0.191969	1.62033	3.07734	Up	4.85e-05	0.000161669
LOC_Os05g14800	4	33	0.191969	1.62033	3.07734	Up	4.85e-05	0.00016166
LOC_Os03g36370	4	33	0.191969	1.62033	3.07734	Up	4.85e-05	0.00016165
LOC_Os01g25090	4	33	0.191969	1.62033	3.07734	Up	4.85e-05	0.00016164
LOC_Os06g02750	4	33	0.191969	1.62033	3.07734	Up	4.85e-05	0.00016163
LOC_Os11g37880	5	41	0.239961	2.01314	3.06857	Up	2.92e-05	0.000102725
LOC_Os10g11530	5	41	0.239961	2.01314	3.06857	Up	2.92e-05	0.000102718
LOC_Os12g15090	5	41	0.239961	2.01314	3.06857	Up	2.92e-05	0.000102712
LOC_Os03g59910	5	40	0.239961	1.96404	3.03295	Up	2.93e-05	0.000102751
LOC_Os02g57965	6	48	0.287954	2.35685	3.03295	Up	1.73e-05	6.37e-05
LOC_Os02g19100	3	24	0.143977	1.17842	3.03295	Up	9.73e-05	0.000299811
LOC_Os03g28969	3	24	0.143977	1.17842	3.03295	Up	9.73e-05	0.000299794
LOC_Os06g27700	3	24	0.143977	1.17842	3.03295	Up	9.73e-05	0.000299777
LOC_Os03g51730	3	24	0.143977	1.17842	3.03295	Up	9.73e-05	0.00029976
LOC_Os03g37360	3	24	0.143977	1.17842	3.03295	Up	9.73e-05	0.000299743
LOC_Os06g02450	4	32	0.191969	1.57123	3.03295	Up	4.88e-05	0.000162721
LOC_Os03g61170	3	24	0.143977	1.17842	3.03295	Up	9.73e-05	0.000299726
LOC_Os10g13780	4	32	0.191969	1.57123	3.03295	Up	4.88e-05	0.000162711
LOC_Os03g19750	4	32	0.191969	1.57123	3.03295	Up	4.88e-05	0.000162701
LOC_Os01g25160	3	24	0.143977	1.17842	3.03295	Up	9.73e-05	0.000299709
LOC_Os08g22480	3	24	0.143977	1.17842	3.03295	Up	9.73e-05	0.000299692
LOC_Os05g18990	3	24	0.143977	1.17842	3.03295	Up	9.73e-05	0.000299675
LOC_Os02g44190	4	32	0.191969	1.57123	3.03295	Up	4.88e-05	0.000162691
LOC_Os08g17850	3	24	0.143977	1.17842	3.03295	Up	9.73e-05	0.000299658
LOC_Os07g12400	4	32	0.191969	1.57123	3.03295	Up	4.88e-05	0.000162681
LOC_Os12g10000	3	24	0.143977	1.17842	3.03295	Up	9.73e-05	0.000299641
LOC_Os06g31120	4	32	0.191969	1.57123	3.03295	Up	4.88e-05	0.000162671
LOC_Os02g25250	3	24	0.143977	1.17842	3.03295	Up	9.73e-05	0.000299624
LOC_Os04g27460	3	24	0.143977	1.17842	3.03295	Up	9.73e-05	0.000299607
LOC_Os09g16440	3	24	0.143977	1.17842	3.03295	Up	9.73e-05	0.00029959
LOC_Os11g43260	3	24	0.143977	1.17842	3.03295	Up	9.73e-05	0.000299573
LOC_Os09g17710	3	24	0.143977	1.17842	3.03295	Up	9.73e-05	0.000299556
LOC_Os06g34580	4	32	0.191969	1.57123	3.03295	Up	4.88e-05	0.000162661
LOC_Os09g11470	3	24	0.143977	1.17842	3.03295	Up	9.73e-05	0.000299539
LOC_Os06g26150	3	24	0.143977	1.17842	3.03295	Up	9.73e-05	0.000299523
LOC_Os02g36200	3	24	0.143977	1.17842	3.03295	Up	9.73e-05	0.000299506
LOC_Os08g27300	3	24	0.143977	1.17842	3.03295	Up	9.73e-05	0.000299489
LOC_Os04g14600	3	24	0.143977	1.17842	3.03295	Up	9.73e-05	0.000299472
LOC_Os08g21434	3	24	0.143977	1.17842	3.03295	Up	9.73e-05	0.000299455
LOC_Os11g22740	3	24	0.143977	1.17842	3.03295	Up	9.73e-05	0.000299438
LOC_Os06g37250	4	32	0.191969	1.57123	3.03295	Up	4.88e-05	0.000162652
LOC_Os08g01008	5	39	0.239961	1.91494	2.99642	Up	2.93e-05	0.0001028
LOC_Os09g28950	5	39	0.239961	1.91494	2.99642	Up	2.93e-05	0.000102794
LOC_Os07g27020	4	31	0.191969	1.52213	2.98715	Up	4.94e-05	0.000164614
LOC_Os10g23260	4	31	0.191969	1.52213	2.98715	Up	4.94e-05	0.000164604
LOC_Os04g21370	4	31	0.191969	1.52213	2.98715	Up	4.94e-05	0.000164594
LOC_Os11g16260	4	31	0.191969	1.52213	2.98715	Up	4.94e-05	0.000164584
LOC_Os07g25600	4	31	0.191969	1.52213	2.98715	Up	4.94e-05	0.000164573
LOC_Os03g35520	4	31	0.191969	1.52213	2.98715	Up	4.94e-05	0.000164563
LOC_Os06g32710	4	31	0.191969	1.52213	2.98715	Up	4.94e-05	0.000164553
LOC_Os05g18160	4	31	0.191969	1.52213	2.98715	Up	4.94e-05	0.000164543
LOC_Os03g45040	4	31	0.191969	1.52213	2.98715	Up	4.94e-05	0.000164533
LOC_Os10g24250	4	31	0.191969	1.52213	2.98715	Up	4.94e-05	0.000164523
LOC_Os08g09090	4	31	0.191969	1.52213	2.98715	Up	4.94e-05	0.000164513
LOC_Os06g28620	4	31	0.191969	1.52213	2.98715	Up	4.94e-05	0.000164503
LOC_Os09g22120	4	31	0.191969	1.52213	2.98715	Up	4.94e-05	0.000164493
LOC_Os12g28240	4	31	0.191969	1.52213	2.98715	Up	4.94e-05	0.000164483
LOC_Os11g37170	4	31	0.191969	1.52213	2.98715	Up	4.94e-05	0.000164473
LOC_Os05g39640	4	31	0.191969	1.52213	2.98715	Up	4.94e-05	0.000164463
LOC_Os03g18100	4	31	0.191969	1.52213	2.98715	Up	4.94e-05	0.000164453
LOC_Os08g16750	4	31	0.191969	1.52213	2.98715	Up	4.94e-05	0.000164443
LOC_Os05g06190	4	31	0.191969	1.52213	2.98715	Up	4.94e-05	0.000164433
LOC_Os07g15830	4	31	0.191969	1.52213	2.98715	Up	4.94e-05	0.000164423
LOC_Os03g42890	4	31	0.191969	1.52213	2.98715	Up	4.94e-05	0.000164412
LOC_Os01g23144	3	23	0.143977	1.12932	2.97155	Up	0.00011462	0.0003469
LOC_Os05g30090	3	23	0.143977	1.12932	2.97155	Up	0.00011462	0.000346881
LOC_Os01g33430	3	23	0.143977	1.12932	2.97155	Up	0.00011462	0.000346862
LOC_Os08g14500	3	23	0.143977	1.12932	2.97155	Up	0.00011462	0.000346843
LOC_Os07g16530	3	23	0.143977	1.12932	2.97155	Up	0.00011462	0.000346823
LOC_Os06g19350	3	23	0.143977	1.12932	2.97155	Up	0.00011462	0.000346804
LOC_Os02g33960	3	23	0.143977	1.12932	2.97155	Up	0.00011462	0.000346785
LOC_Os07g15480	3	23	0.143977	1.12932	2.97155	Up	0.00011462	0.000346765
LOC_Os04g06550	3	23	0.143977	1.12932	2.97155	Up	0.00011462	0.000346746
LOC_Os06g23090	3	23	0.143977	1.12932	2.97155	Up	0.00011462	0.000346727
LOC_Os09g03590	3	23	0.143977	1.12932	2.97155	Up	0.00011462	0.000346708
LOC_Os12g18100	3	23	0.143977	1.12932	2.97155	Up	0.00011462	0.000346688
LOC_Os11g14830	3	23	0.143977	1.12932	2.97155	Up	0.00011462	0.000346669
LOC_Os03g37500	3	23	0.143977	1.12932	2.97155	Up	0.00011462	0.00034665
LOC_Os06g21680	3	23	0.143977	1.12932	2.97155	Up	0.00011462	0.00034663
LOC_Os12g10380	3	23	0.143977	1.12932	2.97155	Up	0.00011462	0.000346611
LOC_Os03g35980	3	23	0.143977	1.12932	2.97155	Up	0.00011462	0.000346592
LOC_Os08g24050	3	23	0.143977	1.12932	2.97155	Up	0.00011462	0.000346573
LOC_Os09g08240	3	23	0.143977	1.12932	2.97155	Up	0.00011462	0.000346553
LOC_Os11g19620	3	23	0.143977	1.12932	2.97155	Up	0.00011462	0.000346534
LOC_Os05g21190	3	23	0.143977	1.12932	2.97155	Up	0.00011462	0.000346515
LOC_Os03g41960	3	23	0.143977	1.12932	2.97155	Up	0.00011462	0.000346496
LOC_Os03g21290	3	23	0.143977	1.12932	2.97155	Up	0.00011462	0.000346476
LOC_Os02g26830	3	23	0.143977	1.12932	2.97155	Up	0.00011462	0.000346457
LOC_Os10g20590	3	23	0.143977	1.12932	2.97155	Up	0.00011462	0.000346438
LOC_Os05g44110	3	23	0.143977	1.12932	2.97155	Up	0.00011462	0.000346419
LOC_Os01g37230	3	23	0.143977	1.12932	2.97155	Up	0.00011462	0.000346399
LOC_Os03g38900	3	23	0.143977	1.12932	2.97155	Up	0.00011462	0.00034638
LOC_Os04g01810	3	23	0.143977	1.12932	2.97155	Up	0.00011462	0.000346361
LOC_Os01g31300	3	23	0.143977	1.12932	2.97155	Up	0.00011462	0.000346342
LOC_Os06g17070	3	23	0.143977	1.12932	2.97155	Up	0.00011462	0.000346322
LOC_Os03g46010	6	46	0.287954	2.25865	2.97155	Up	1.73e-05	6.37e-05
LOC_Os05g31180	6	46	0.287954	2.25865	2.97155	Up	1.73e-05	6.37e-05
LOC_Os12g09060	5	38	0.239961	1.86584	2.95895	Up	2.93e-05	0.000102915
LOC_Os09g23390	5	38	0.239961	1.86584	2.95895	Up	2.93e-05	0.000102909
LOC_Os09g08350	5	38	0.239961	1.86584	2.95895	Up	2.93e-05	0.000102902
LOC_Os05g32620	5	38	0.239961	1.86584	2.95895	Up	2.93e-05	0.000102895
LOC_Os02g27420	5	38	0.239961	1.86584	2.95895	Up	2.93e-05	0.000102889
LOC_Os03g30270	5	38	0.239961	1.86584	2.95895	Up	2.93e-05	0.000102882
LOC_Os11g31310	4	30	0.191969	1.47303	2.93984	Up	5.06e-05	0.000167964
LOC_Os10g24770	4	30	0.191969	1.47303	2.93984	Up	5.06e-05	0.000167954
LOC_Os03g20060	4	30	0.191969	1.47303	2.93984	Up	5.06e-05	0.000167944
LOC_Os01g64320	4	30	0.191969	1.47303	2.93984	Up	5.06e-05	0.000167934
LOC_Os08g21830	4	30	0.191969	1.47303	2.93984	Up	5.06e-05	0.000167923
LOC_Os05g03260	4	30	0.191969	1.47303	2.93984	Up	5.06e-05	0.000167913
LOC_Os01g10420	4	30	0.191969	1.47303	2.93984	Up	5.06e-05	0.000167903
LOC_Os09g07060	4	30	0.191969	1.47303	2.93984	Up	5.06e-05	0.000167893
LOC_Os12g10060	4	30	0.191969	1.47303	2.93984	Up	5.06e-05	0.000167882
LOC_Os02g21060	4	30	0.191969	1.47303	2.93984	Up	5.06e-05	0.000167872
LOC_Os07g22129	4	30	0.191969	1.47303	2.93984	Up	5.06e-05	0.000167862
LOC_Os02g29830	4	30	0.191969	1.47303	2.93984	Up	5.06e-05	0.000167852
LOC_Os01g11704	4	30	0.191969	1.47303	2.93984	Up	5.06e-05	0.000167841
LOC_Os05g00990	4	30	0.191969	1.47303	2.93984	Up	5.06e-05	0.000167831
LOC_Os11g22100	5	37	0.239961	1.81674	2.92048	Up	2.94e-05	0.000103141
LOC_Os04g50040	5	37	0.239961	1.81674	2.92048	Up	2.94e-05	0.000103135
LOC_Os01g41590	5	37	0.239961	1.81674	2.92048	Up	2.94e-05	0.000103128
LOC_Os06g44720	5	37	0.239961	1.81674	2.92048	Up	2.94e-05	0.000103121
LOC_Os06g22120	5	37	0.239961	1.81674	2.92048	Up	2.94e-05	0.000103115
LOC_Os04g50192	5	37	0.239961	1.81674	2.92048	Up	2.94e-05	0.000103108
LOC_Os01g25210	5	37	0.239961	1.81674	2.92048	Up	2.94e-05	0.000103102
LOC_Os04g34820	6	44	0.287954	2.16044	2.90742	Up	1.73e-05	6.37e-05
LOC_Os12g43230	3	22	0.143977	1.08022	2.90742	Up	0.000145751	0.000428533
LOC_Os05g17930	3	22	0.143977	1.08022	2.90742	Up	0.000145751	0.00042851
LOC_Os11g19540	3	22	0.143977	1.08022	2.90742	Up	0.000145751	0.000428487
LOC_Os12g19200	3	22	0.143977	1.08022	2.90742	Up	0.000145751	0.000428464
LOC_Os02g25010	3	22	0.143977	1.08022	2.90742	Up	0.000145751	0.00042844
LOC_Os02g16890	3	22	0.143977	1.08022	2.90742	Up	0.000145751	0.000428417
LOC_Os08g34940	3	22	0.143977	1.08022	2.90742	Up	0.000145751	0.000428394
LOC_Os05g11530	3	22	0.143977	1.08022	2.90742	Up	0.000145751	0.000428371
LOC_Os02g04470	3	22	0.143977	1.08022	2.90742	Up	0.000145751	0.000428348
LOC_Os03g41932	3	22	0.143977	1.08022	2.90742	Up	0.000145751	0.000428325
LOC_Os12g12330	3	22	0.143977	1.08022	2.90742	Up	0.000145751	0.000428302
LOC_Os09g04980	3	22	0.143977	1.08022	2.90742	Up	0.000145751	0.000428278
LOC_Os08g03080	3	22	0.143977	1.08022	2.90742	Up	0.000145751	0.000428255
LOC_Os05g27810	3	22	0.143977	1.08022	2.90742	Up	0.000145751	0.000428232
LOC_Os11g10570	3	22	0.143977	1.08022	2.90742	Up	0.000145751	0.000428209
LOC_Os02g31010	3	22	0.143977	1.08022	2.90742	Up	0.000145751	0.000428186
LOC_Os02g34340	3	22	0.143977	1.08022	2.90742	Up	0.000145751	0.000428163
LOC_Os10g01780	3	22	0.143977	1.08022	2.90742	Up	0.000145751	0.00042814
LOC_Os06g38390	3	22	0.143977	1.08022	2.90742	Up	0.000145751	0.000428117
LOC_Os11g24150	3	22	0.143977	1.08022	2.90742	Up	0.000145751	0.000428093
LOC_Os05g30610	3	22	0.143977	1.08022	2.90742	Up	0.000145751	0.00042807
LOC_Os01g35080	3	22	0.143977	1.08022	2.90742	Up	0.000145751	0.000428047
LOC_Os02g21950	3	22	0.143977	1.08022	2.90742	Up	0.000145751	0.000428024
LOC_Os07g25860	3	22	0.143977	1.08022	2.90742	Up	0.000145751	0.000428001
LOC_Os01g48090	3	22	0.143977	1.08022	2.90742	Up	0.000145751	0.000427978
LOC_Os12g24350	3	22	0.143977	1.08022	2.90742	Up	0.000145751	0.000427955
LOC_Os01g67930	3	22	0.143977	1.08022	2.90742	Up	0.000145751	0.000427932
LOC_Os09g10790	3	22	0.143977	1.08022	2.90742	Up	0.000145751	0.000427909
LOC_Os11g17110	3	22	0.143977	1.08022	2.90742	Up	0.000145751	0.000427885
LOC_Os06g37260	3	22	0.143977	1.08022	2.90742	Up	0.000145751	0.000427862
LOC_Os02g13250	3	22	0.143977	1.08022	2.90742	Up	0.000145751	0.000427839
LOC_Os09g07040	3	22	0.143977	1.08022	2.90742	Up	0.000145751	0.000427816
LOC_Os11g17730	3	22	0.143977	1.08022	2.90742	Up	0.000145751	0.000427793
LOC_Os07g44670	3	22	0.143977	1.08022	2.90742	Up	0.000145751	0.00042777
LOC_Os01g32860	3	22	0.143977	1.08022	2.90742	Up	0.000145751	0.000427747
LOC_Os10g20740	3	22	0.143977	1.08022	2.90742	Up	0.000145751	0.000427724
LOC_Os02g12520	3	22	0.143977	1.08022	2.90742	Up	0.000145751	0.000427701
LOC_Os05g39920	7	51	0.335946	2.50415	2.89802	Up	1e-05	3.86e-05
LOC_Os01g38400	4	29	0.191969	1.42393	2.89093	Up	5.26e-05	0.000173734
LOC_Os05g24450	4	29	0.191969	1.42393	2.89093	Up	5.26e-05	0.000173723
LOC_Os10g25740	4	29	0.191969	1.42393	2.89093	Up	5.26e-05	0.000173713
LOC_Os02g18270	4	29	0.191969	1.42393	2.89093	Up	5.26e-05	0.000173702
LOC_Os01g34730	4	29	0.191969	1.42393	2.89093	Up	5.26e-05	0.000173691
LOC_Os09g06450	4	29	0.191969	1.42393	2.89093	Up	5.26e-05	0.000173681
LOC_Os11g08520	4	29	0.191969	1.42393	2.89093	Up	5.26e-05	0.00017367
LOC_Os08g39750	4	29	0.191969	1.42393	2.89093	Up	5.26e-05	0.00017366
LOC_Os06g34290	4	29	0.191969	1.42393	2.89093	Up	5.26e-05	0.000173649
LOC_Os08g13960	4	29	0.191969	1.42393	2.89093	Up	5.26e-05	0.000173639
LOC_Os11g29550	4	29	0.191969	1.42393	2.89093	Up	5.26e-05	0.000173628
LOC_Os09g11180	4	29	0.191969	1.42393	2.89093	Up	5.26e-05	0.000173618
LOC_Os03g37050	4	29	0.191969	1.42393	2.89093	Up	5.26e-05	0.000173607
LOC_Os05g16500	4	29	0.191969	1.42393	2.89093	Up	5.26e-05	0.000173597
LOC_Os09g22080	4	29	0.191969	1.42393	2.89093	Up	5.26e-05	0.000173586
LOC_Os09g17900	4	29	0.191969	1.42393	2.89093	Up	5.26e-05	0.000173576
LOC_Os10g02900	4	29	0.191969	1.42393	2.89093	Up	5.26e-05	0.000173565
LOC_Os07g15410	4	29	0.191969	1.42393	2.89093	Up	5.26e-05	0.000173554
LOC_Os04g37830	4	29	0.191969	1.42393	2.89093	Up	5.26e-05	0.000173544
LOC_Os02g26910	4	29	0.191969	1.42393	2.89093	Up	5.26e-05	0.000173533
LOC_Os02g22790	4	29	0.191969	1.42393	2.89093	Up	5.26e-05	0.000173523
LOC_Os02g34920	4	29	0.191969	1.42393	2.89093	Up	5.26e-05	0.000173512
LOC_Os12g25610	4	29	0.191969	1.42393	2.89093	Up	5.26e-05	0.000173502
LOC_Os05g18820	4	29	0.191969	1.42393	2.89093	Up	5.26e-05	0.000173491
LOC_Os05g15190	4	29	0.191969	1.42393	2.89093	Up	5.26e-05	0.000173481
LOC_Os12g24930	4	29	0.191969	1.42393	2.89093	Up	5.26e-05	0.00017347
LOC_Os07g08990	4	29	0.191969	1.42393	2.89093	Up	5.26e-05	0.00017346
LOC_Os10g20330	5	36	0.239961	1.76764	2.88095	Up	2.95e-05	0.000103562
LOC_Os05g51910	5	36	0.239961	1.76764	2.88095	Up	2.95e-05	0.000103556
LOC_Os04g20650	5	36	0.239961	1.76764	2.88095	Up	2.95e-05	0.000103549
LOC_Os11g29530	5	36	0.239961	1.76764	2.88095	Up	2.95e-05	0.000103542
LOC_Os03g41780	5	36	0.239961	1.76764	2.88095	Up	2.95e-05	0.000103536
LOC_Os06g30590	5	36	0.239961	1.76764	2.88095	Up	2.95e-05	0.000103529
LOC_Os07g05530	5	36	0.239961	1.76764	2.88095	Up	2.95e-05	0.000103522
LOC_Os01g48160	5	36	0.239961	1.76764	2.88095	Up	2.95e-05	0.000103516
LOC_Os05g39510	6	43	0.287954	2.11134	2.87425	Up	1.73e-05	6.38e-05
LOC_Os01g65870	7	50	0.335946	2.45505	2.86945	Up	1e-05	3.86e-05
LOC_Os03g32560	5	35	0.239961	1.71853	2.84031	Up	2.98e-05	0.000104335
LOC_Os01g15180	5	35	0.239961	1.71853	2.84031	Up	2.98e-05	0.000104328
LOC_Os01g04740	5	35	0.239961	1.71853	2.84031	Up	2.98e-05	0.000104321
LOC_Os07g31480	5	35	0.239961	1.71853	2.84031	Up	2.98e-05	0.000104315
LOC_Os02g09160	5	35	0.239961	1.71853	2.84031	Up	2.98e-05	0.000104308
LOC_Os12g02970	3	21	0.143977	1.03112	2.84031	Up	0.000201466	0.000572242
LOC_Os06g19810	3	21	0.143977	1.03112	2.84031	Up	0.000201466	0.000572212
LOC_Os11g31280	3	21	0.143977	1.03112	2.84031	Up	0.000201466	0.000572182
LOC_Os03g33120	3	21	0.143977	1.03112	2.84031	Up	0.000201466	0.000572153
LOC_Os03g45820	3	21	0.143977	1.03112	2.84031	Up	0.000201466	0.000572123
LOC_Os10g23320	3	21	0.143977	1.03112	2.84031	Up	0.000201466	0.000572093
LOC_Os05g49720	3	21	0.143977	1.03112	2.84031	Up	0.000201466	0.000572063
LOC_Os03g40300	3	21	0.143977	1.03112	2.84031	Up	0.000201466	0.000572033
LOC_Os07g27420	3	21	0.143977	1.03112	2.84031	Up	0.000201466	0.000572003
LOC_Os06g24080	3	21	0.143977	1.03112	2.84031	Up	0.000201466	0.000571973
LOC_Os03g36300	3	21	0.143977	1.03112	2.84031	Up	0.000201466	0.000571944
LOC_Os05g22570	3	21	0.143977	1.03112	2.84031	Up	0.000201466	0.000571914
LOC_Os07g16680	3	21	0.143977	1.03112	2.84031	Up	0.000201466	0.000571884
LOC_Os09g33750	3	21	0.143977	1.03112	2.84031	Up	0.000201466	0.000571854
LOC_Os11g30980	3	21	0.143977	1.03112	2.84031	Up	0.000201466	0.000571824
LOC_Os04g19010	3	21	0.143977	1.03112	2.84031	Up	0.000201466	0.000571794
LOC_Os12g03760	3	21	0.143977	1.03112	2.84031	Up	0.000201466	0.000571764
LOC_Os05g24500	3	21	0.143977	1.03112	2.84031	Up	0.000201466	0.000571735
LOC_Os06g15010	3	21	0.143977	1.03112	2.84031	Up	0.000201466	0.000571705
LOC_Os03g35860	3	21	0.143977	1.03112	2.84031	Up	0.000201466	0.000571675
LOC_Os11g25660	3	21	0.143977	1.03112	2.84031	Up	0.000201466	0.000571645
LOC_Os04g12420	3	21	0.143977	1.03112	2.84031	Up	0.000201466	0.000571615
LOC_Os05g27190	3	21	0.143977	1.03112	2.84031	Up	0.000201466	0.000571586
LOC_Os01g16160	3	21	0.143977	1.03112	2.84031	Up	0.000201466	0.000571556
LOC_Os03g36970	3	21	0.143977	1.03112	2.84031	Up	0.000201466	0.000571526
LOC_Os02g29670	3	21	0.143977	1.03112	2.84031	Up	0.000201466	0.000571496
LOC_Os08g39910	3	21	0.143977	1.03112	2.84031	Up	0.000201466	0.000571466
LOC_Os11g24040	3	21	0.143977	1.03112	2.84031	Up	0.000201466	0.000571437
LOC_Os06g29920	3	21	0.143977	1.03112	2.84031	Up	0.000201466	0.000571407
LOC_Os08g29460	3	21	0.143977	1.03112	2.84031	Up	0.000201466	0.000571377
LOC_Os11g11530	3	21	0.143977	1.03112	2.84031	Up	0.000201466	0.000571347
LOC_Os04g27330	3	21	0.143977	1.03112	2.84031	Up	0.000201466	0.000571317
LOC_Os01g04510	3	21	0.143977	1.03112	2.84031	Up	0.000201466	0.000571288
LOC_Os11g18100	3	21	0.143977	1.03112	2.84031	Up	0.000201466	0.000571258
LOC_Os03g36590	3	21	0.143977	1.03112	2.84031	Up	0.000201466	0.000571228
LOC_Os02g22700	3	21	0.143977	1.03112	2.84031	Up	0.000201466	0.000571198
LOC_Os12g35990	3	21	0.143977	1.03112	2.84031	Up	0.000201466	0.000571169
LOC_Os09g31494	6	42	0.287954	2.06224	2.84031	Up	1.73e-05	6.38e-05
LOC_Os03g44720	6	42	0.287954	2.06224	2.84031	Up	1.73e-05	6.38e-05
LOC_Os08g05460	6	42	0.287954	2.06224	2.84031	Up	1.73e-05	6.38e-05
LOC_Os05g10350	6	42	0.287954	2.06224	2.84031	Up	1.73e-05	6.38e-05
LOC_Os08g03030	4	28	0.191969	1.37483	2.84031	Up	5.62e-05	0.000184773
LOC_Os12g15370	4	28	0.191969	1.37483	2.84031	Up	5.62e-05	0.000184762
LOC_Os04g07944	4	28	0.191969	1.37483	2.84031	Up	5.62e-05	0.000184751
LOC_Os12g14500	4	28	0.191969	1.37483	2.84031	Up	5.62e-05	0.000184739
LOC_Os03g46134	4	28	0.191969	1.37483	2.84031	Up	5.62e-05	0.000184728
LOC_Os09g21310	4	28	0.191969	1.37483	2.84031	Up	5.62e-05	0.000184717
LOC_Os07g33160	4	28	0.191969	1.37483	2.84031	Up	5.62e-05	0.000184706
LOC_Os12g13770	4	28	0.191969	1.37483	2.84031	Up	5.62e-05	0.000184695
LOC_Os10g24060	4	28	0.191969	1.37483	2.84031	Up	5.62e-05	0.000184684
LOC_Os12g33850	4	28	0.191969	1.37483	2.84031	Up	5.62e-05	0.000184672
LOC_Os02g18120	4	28	0.191969	1.37483	2.84031	Up	5.62e-05	0.000184661
LOC_Os12g44120	4	28	0.191969	1.37483	2.84031	Up	5.62e-05	0.00018465
LOC_Os12g21970	4	28	0.191969	1.37483	2.84031	Up	5.62e-05	0.000184639
LOC_Os06g24300	4	28	0.191969	1.37483	2.84031	Up	5.62e-05	0.000184628
LOC_Os12g34930	4	28	0.191969	1.37483	2.84031	Up	5.62e-05	0.000184617
LOC_Os06g42330	4	28	0.191969	1.37483	2.84031	Up	5.62e-05	0.000184606
LOC_Os10g32210	4	28	0.191969	1.37483	2.84031	Up	5.62e-05	0.000184594
LOC_Os03g37984	4	28	0.191969	1.37483	2.84031	Up	5.62e-05	0.000184583
LOC_Os11g26725	4	28	0.191969	1.37483	2.84031	Up	5.62e-05	0.000184572
LOC_Os09g01002	4	28	0.191969	1.37483	2.84031	Up	5.62e-05	0.000184561
LOC_Os01g14470	4	28	0.191969	1.37483	2.84031	Up	5.62e-05	0.00018455
LOC_Os12g25880	4	28	0.191969	1.37483	2.84031	Up	5.62e-05	0.000184539
LOC_Os11g27280	4	28	0.191969	1.37483	2.84031	Up	5.62e-05	0.000184528
LOC_Os12g24740	4	28	0.191969	1.37483	2.84031	Up	5.62e-05	0.000184516
LOC_Os02g36050	4	28	0.191969	1.37483	2.84031	Up	5.62e-05	0.000184505
LOC_Os03g51350	41	286	1.96768	14.0429	2.83527	Up	1.53e-13	1.63e-12
LOC_Os12g33962	15	103	0.719884	5.0574	2.81256	Up	8.9e-08	4.44e-07
LOC_Os01g18370	6	41	0.287954	2.01314	2.80554	Up	1.74e-05	6.39e-05
LOC_Os08g28420	5	34	0.239961	1.66943	2.79848	Up	3.02e-05	0.0001057
LOC_Os05g26980	5	34	0.239961	1.66943	2.79848	Up	3.02e-05	0.000105693
LOC_Os02g15190	5	34	0.239961	1.66943	2.79848	Up	3.02e-05	0.000105687
LOC_Os10g17300	5	34	0.239961	1.66943	2.79848	Up	3.02e-05	0.00010568
LOC_Os11g27790	5	34	0.239961	1.66943	2.79848	Up	3.02e-05	0.000105673
LOC_Os08g02010	5	34	0.239961	1.66943	2.79848	Up	3.02e-05	0.000105666
LOC_Os11g27460	5	34	0.239961	1.66943	2.79848	Up	3.02e-05	0.000105659
LOC_Os02g25210	5	34	0.239961	1.66943	2.79848	Up	3.02e-05	0.000105653
LOC_Os04g16690	5	34	0.239961	1.66943	2.79848	Up	3.02e-05	0.000105646
LOC_Os06g39830	5	34	0.239961	1.66943	2.79848	Up	3.02e-05	0.000105639
LOC_Os04g29130	5	34	0.239961	1.66943	2.79848	Up	3.02e-05	0.000105632
LOC_Os03g60440	4	27	0.191969	1.32573	2.78784	Up	6.26e-05	0.000202636
LOC_Os07g26260	4	27	0.191969	1.32573	2.78784	Up	6.26e-05	0.000202624
LOC_Os01g25970	4	27	0.191969	1.32573	2.78784	Up	6.26e-05	0.000202612
LOC_Os01g66790	4	27	0.191969	1.32573	2.78784	Up	6.26e-05	0.0002026
LOC_Os09g03970	4	27	0.191969	1.32573	2.78784	Up	6.26e-05	0.000202588
LOC_Os07g29150	4	27	0.191969	1.32573	2.78784	Up	6.26e-05	0.000202576
LOC_Os06g37760	4	27	0.191969	1.32573	2.78784	Up	6.26e-05	0.000202564
LOC_Os07g20370	4	27	0.191969	1.32573	2.78784	Up	6.26e-05	0.000202552
LOC_Os10g18440	4	27	0.191969	1.32573	2.78784	Up	6.26e-05	0.00020254
LOC_Os12g13445	4	27	0.191969	1.32573	2.78784	Up	6.26e-05	0.000202528
LOC_Os02g17010	4	27	0.191969	1.32573	2.78784	Up	6.26e-05	0.000202516
LOC_Os08g15900	4	27	0.191969	1.32573	2.78784	Up	6.26e-05	0.000202504
LOC_Os12g21990	4	27	0.191969	1.32573	2.78784	Up	6.26e-05	0.000202492
LOC_Os10g03060	4	27	0.191969	1.32573	2.78784	Up	6.26e-05	0.00020248
LOC_Os11g29160	4	27	0.191969	1.32573	2.78784	Up	6.26e-05	0.000202468
LOC_Os09g10370	4	27	0.191969	1.32573	2.78784	Up	6.26e-05	0.000202456
LOC_Os04g13080	4	27	0.191969	1.32573	2.78784	Up	6.26e-05	0.000202444
LOC_Os02g01950	4	27	0.191969	1.32573	2.78784	Up	6.26e-05	0.000202432
LOC_Os08g19740	4	27	0.191969	1.32573	2.78784	Up	6.26e-05	0.00020242
LOC_Os01g51960	4	27	0.191969	1.32573	2.78784	Up	6.26e-05	0.000202407
LOC_Os02g20810	4	27	0.191969	1.32573	2.78784	Up	6.26e-05	0.000202395
LOC_Os09g20270	4	27	0.191969	1.32573	2.78784	Up	6.26e-05	0.000202383
LOC_Os08g15890	4	27	0.191969	1.32573	2.78784	Up	6.26e-05	0.000202371
LOC_Os02g18190	4	27	0.191969	1.32573	2.78784	Up	6.26e-05	0.000202359
LOC_Os03g08510	8	54	0.383938	2.65145	2.78784	Up	5.73e-06	2.28e-05
LOC_Os01g10240	11	74	0.527915	3.63347	2.78297	Up	1e-06	4.41e-06
LOC_Os12g02170	7	47	0.335946	2.30775	2.78018	Up	1e-05	3.86e-05
LOC_Os12g35520	6	40	0.287954	1.96404	2.76992	Up	1.74e-05	6.41e-05
LOC_Os02g33520	6	40	0.287954	1.96404	2.76992	Up	1.74e-05	6.41e-05
LOC_Os11g03770	6	40	0.287954	1.96404	2.76992	Up	1.74e-05	6.41e-05
LOC_Os04g25420	6	40	0.287954	1.96404	2.76992	Up	1.74e-05	6.41e-05
LOC_Os02g39440	3	20	0.143977	0.98202	2.76992	Up	0.000300656	0.000815409
LOC_Os08g17570	3	20	0.143977	0.98202	2.76992	Up	0.000300656	0.000815368
LOC_Os04g18130	3	20	0.143977	0.98202	2.76992	Up	0.000300656	0.000815328
LOC_Os05g17080	3	20	0.143977	0.98202	2.76992	Up	0.000300656	0.000815287
LOC_Os06g29190	3	20	0.143977	0.98202	2.76992	Up	0.000300656	0.000815246
LOC_Os04g14860	3	20	0.143977	0.98202	2.76992	Up	0.000300656	0.000815206
LOC_Os08g38940	3	20	0.143977	0.98202	2.76992	Up	0.000300656	0.000815165
LOC_Os08g10170	3	20	0.143977	0.98202	2.76992	Up	0.000300656	0.000815124
LOC_Os04g34400	3	20	0.143977	0.98202	2.76992	Up	0.000300656	0.000815084
LOC_Os06g45220	3	20	0.143977	0.98202	2.76992	Up	0.000300656	0.000815043
LOC_Os04g13900	3	20	0.143977	0.98202	2.76992	Up	0.000300656	0.000815003
LOC_Os12g22740	3	20	0.143977	0.98202	2.76992	Up	0.000300656	0.000814962
LOC_Os11g09919	3	20	0.143977	0.98202	2.76992	Up	0.000300656	0.000814921
LOC_Os03g55000	3	20	0.143977	0.98202	2.76992	Up	0.000300656	0.000814881
LOC_Os01g54160	3	20	0.143977	0.98202	2.76992	Up	0.000300656	0.00081484
LOC_Os11g48100	3	20	0.143977	0.98202	2.76992	Up	0.000300656	0.0008148
LOC_Os02g34350	3	20	0.143977	0.98202	2.76992	Up	0.000300656	0.000814759
LOC_Os09g02940	3	20	0.143977	0.98202	2.76992	Up	0.000300656	0.000814718
LOC_Os11g26360	3	20	0.143977	0.98202	2.76992	Up	0.000300656	0.000814678
LOC_Os12g01470	3	20	0.143977	0.98202	2.76992	Up	0.000300656	0.000814637
LOC_Os02g13230	3	20	0.143977	0.98202	2.76992	Up	0.000300656	0.000814597
LOC_Os06g35920	3	20	0.143977	0.98202	2.76992	Up	0.000300656	0.000814556
LOC_Os07g27170	3	20	0.143977	0.98202	2.76992	Up	0.000300656	0.000814516
LOC_Os04g10080	3	20	0.143977	0.98202	2.76992	Up	0.000300656	0.000814475
LOC_Os10g24100	3	20	0.143977	0.98202	2.76992	Up	0.000300656	0.000814434
LOC_Os01g01320	3	20	0.143977	0.98202	2.76992	Up	0.000300656	0.000814394
LOC_Os12g14040	3	20	0.143977	0.98202	2.76992	Up	0.000300656	0.000814353
LOC_Os05g28390	3	20	0.143977	0.98202	2.76992	Up	0.000300656	0.000814313
LOC_Os06g23800	3	20	0.143977	0.98202	2.76992	Up	0.000300656	0.000814272
LOC_Os04g16580	3	20	0.143977	0.98202	2.76992	Up	0.000300656	0.000814232
LOC_Os03g45650	3	20	0.143977	0.98202	2.76992	Up	0.000300656	0.000814191
LOC_Os12g25100	3	20	0.143977	0.98202	2.76992	Up	0.000300656	0.000814151
LOC_Os01g19660	3	20	0.143977	0.98202	2.76992	Up	0.000300656	0.00081411
LOC_Os04g12170	3	20	0.143977	0.98202	2.76992	Up	0.000300656	0.00081407
LOC_Os06g16970	3	20	0.143977	0.98202	2.76992	Up	0.000300656	0.000814029
LOC_Os08g44070	3	20	0.143977	0.98202	2.76992	Up	0.000300656	0.000813989
LOC_Os08g24960	3	20	0.143977	0.98202	2.76992	Up	0.000300656	0.000813948
LOC_Os08g25450	3	20	0.143977	0.98202	2.76992	Up	0.000300656	0.000813908
LOC_Os09g20570	3	20	0.143977	0.98202	2.76992	Up	0.000300656	0.000813867
LOC_Os10g22810	3	20	0.143977	0.98202	2.76992	Up	0.000300656	0.000813827
LOC_Os06g26100	3	20	0.143977	0.98202	2.76992	Up	0.000300656	0.000813786
LOC_Os11g27990	3	20	0.143977	0.98202	2.76992	Up	0.000300656	0.000813746
LOC_Os12g05570	3	20	0.143977	0.98202	2.76992	Up	0.000300656	0.000813705
LOC_Os04g07610	3	20	0.143977	0.98202	2.76992	Up	0.000300656	0.000813665
LOC_Os06g21010	3	20	0.143977	0.98202	2.76992	Up	0.000300656	0.000813624
LOC_Os11g28570	3	20	0.143977	0.98202	2.76992	Up	0.000300656	0.000813584
LOC_Os07g17670	3	20	0.143977	0.98202	2.76992	Up	0.000300656	0.000813543
LOC_Os07g26310	3	20	0.143977	0.98202	2.76992	Up	0.000300656	0.000813503
LOC_Os11g21810	3	20	0.143977	0.98202	2.76992	Up	0.000300656	0.000813462
LOC_Os08g15990	5	33	0.239961	1.62033	2.75542	Up	3.1e-05	0.000108118
LOC_Os02g05260	5	33	0.239961	1.62033	2.75542	Up	3.1e-05	0.000108111
LOC_Os12g23900	5	33	0.239961	1.62033	2.75542	Up	3.1e-05	0.000108104
LOC_Os07g16070	5	33	0.239961	1.62033	2.75542	Up	3.1e-05	0.000108097
LOC_Os01g49450	5	33	0.239961	1.62033	2.75542	Up	3.1e-05	0.000108091
LOC_Os12g20370	5	33	0.239961	1.62033	2.75542	Up	3.1e-05	0.000108084
LOC_Os09g12610	5	33	0.239961	1.62033	2.75542	Up	3.1e-05	0.000108077
LOC_Os04g12380	5	33	0.239961	1.62033	2.75542	Up	3.1e-05	0.00010807
LOC_Os09g12990	5	33	0.239961	1.62033	2.75542	Up	3.1e-05	0.000108063
LOC_Os08g37410	5	33	0.239961	1.62033	2.75542	Up	3.1e-05	0.000108056
LOC_Os04g38510	5	33	0.239961	1.62033	2.75542	Up	3.1e-05	0.000108049
LOC_Os07g43610	5	33	0.239961	1.62033	2.75542	Up	3.1e-05	0.000108042
LOC_Os12g37120	5	33	0.239961	1.62033	2.75542	Up	3.1e-05	0.000108035
LOC_Os11g22690	5	33	0.239961	1.62033	2.75542	Up	3.1e-05	0.000108028
LOC_Os07g26570	5	33	0.239961	1.62033	2.75542	Up	3.1e-05	0.000108021
LOC_Os10g06920	5	33	0.239961	1.62033	2.75542	Up	3.1e-05	0.000108014
LOC_Os02g28800	7	46	0.335946	2.25865	2.74916	Up	1.01e-05	3.86e-05
LOC_Os10g31070	7	46	0.335946	2.25865	2.74916	Up	1.01e-05	3.86e-05
LOC_Os02g42840	7	46	0.335946	2.25865	2.74916	Up	1.01e-05	3.86e-05
LOC_Os03g16920	43	281	2.06367	13.7974	2.74111	Up	1.33e-13	1.43e-12
LOC_Os03g56120	6	39	0.287954	1.91494	2.73339	Up	1.75e-05	6.44e-05
LOC_Os05g37990	8	52	0.383938	2.55325	2.73339	Up	5.74e-06	2.28e-05
LOC_Os03g37060	4	26	0.191969	1.27663	2.73339	Up	7.4e-05	0.000235414
LOC_Os10g02150	4	26	0.191969	1.27663	2.73339	Up	7.4e-05	0.0002354
LOC_Os11g17690	4	26	0.191969	1.27663	2.73339	Up	7.4e-05	0.000235387
LOC_Os06g09030	4	26	0.191969	1.27663	2.73339	Up	7.4e-05	0.000235373
LOC_Os11g14560	4	26	0.191969	1.27663	2.73339	Up	7.4e-05	0.000235359
LOC_Os07g24300	4	26	0.191969	1.27663	2.73339	Up	7.4e-05	0.000235345
LOC_Os05g28220	4	26	0.191969	1.27663	2.73339	Up	7.4e-05	0.000235332
LOC_Os01g11850	4	26	0.191969	1.27663	2.73339	Up	7.4e-05	0.000235318
LOC_Os07g14260	4	26	0.191969	1.27663	2.73339	Up	7.4e-05	0.000235304
LOC_Os03g30020	4	26	0.191969	1.27663	2.73339	Up	7.4e-05	0.00023529
LOC_Os06g08980	4	26	0.191969	1.27663	2.73339	Up	7.4e-05	0.000235277
LOC_Os12g39270	4	26	0.191969	1.27663	2.73339	Up	7.4e-05	0.000235263
LOC_Os09g05120	4	26	0.191969	1.27663	2.73339	Up	7.4e-05	0.000235249
LOC_Os01g70030	4	26	0.191969	1.27663	2.73339	Up	7.4e-05	0.000235235
LOC_Os05g13700	4	26	0.191969	1.27663	2.73339	Up	7.4e-05	0.000235222
LOC_Os08g31160	4	26	0.191969	1.27663	2.73339	Up	7.4e-05	0.000235208
LOC_Os02g54960	4	26	0.191969	1.27663	2.73339	Up	7.4e-05	0.000235194
LOC_Os04g09870	4	26	0.191969	1.27663	2.73339	Up	7.4e-05	0.00023518
LOC_Os09g37130	4	26	0.191969	1.27663	2.73339	Up	7.4e-05	0.000235167
LOC_Os09g15940	4	26	0.191969	1.27663	2.73339	Up	7.4e-05	0.000235153
LOC_Os01g18690	4	26	0.191969	1.27663	2.73339	Up	7.4e-05	0.000235139
LOC_Os11g19120	4	26	0.191969	1.27663	2.73339	Up	7.4e-05	0.000235125
LOC_Os02g22760	4	26	0.191969	1.27663	2.73339	Up	7.4e-05	0.000235112
LOC_Os04g28160	4	26	0.191969	1.27663	2.73339	Up	7.4e-05	0.000235098
LOC_Os05g22314	4	26	0.191969	1.27663	2.73339	Up	7.4e-05	0.000235084
LOC_Os09g07180	4	26	0.191969	1.27663	2.73339	Up	7.4e-05	0.000235071
LOC_Os01g34440	4	26	0.191969	1.27663	2.73339	Up	7.4e-05	0.000235057
LOC_Os06g39990	4	26	0.191969	1.27663	2.73339	Up	7.4e-05	0.000235043
LOC_Os12g21980	4	26	0.191969	1.27663	2.73339	Up	7.4e-05	0.000235029
LOC_Os01g42860	21	135	1.00784	6.62863	2.71745	Up	2.13e-09	1.3e-08
LOC_Os11g42410	7	45	0.335946	2.20954	2.71745	Up	1.01e-05	3.86e-05
LOC_Os01g21430	5	32	0.239961	1.57123	2.71102	Up	3.23e-05	0.000112423
LOC_Os12g28600	5	32	0.239961	1.57123	2.71102	Up	3.23e-05	0.000112415
LOC_Os04g21490	5	32	0.239961	1.57123	2.71102	Up	3.23e-05	0.000112408
LOC_Os01g29250	5	32	0.239961	1.57123	2.71102	Up	3.23e-05	0.000112401
LOC_Os02g36480	5	32	0.239961	1.57123	2.71102	Up	3.23e-05	0.000112394
LOC_Os04g11100	5	32	0.239961	1.57123	2.71102	Up	3.23e-05	0.000112387
LOC_Os01g33820	5	32	0.239961	1.57123	2.71102	Up	3.23e-05	0.00011238
LOC_Os12g35020	5	32	0.239961	1.57123	2.71102	Up	3.23e-05	0.000112372
LOC_Os01g34120	5	32	0.239961	1.57123	2.71102	Up	3.23e-05	0.000112365
LOC_Os06g37820	5	32	0.239961	1.57123	2.71102	Up	3.23e-05	0.000112358
LOC_Os09g06260	5	32	0.239961	1.57123	2.71102	Up	3.23e-05	0.000112351
LOC_Os05g08180	5	32	0.239961	1.57123	2.71102	Up	3.23e-05	0.000112344
LOC_Os09g18460	5	32	0.239961	1.57123	2.71102	Up	3.23e-05	0.000112336
LOC_Os10g01164	5	32	0.239961	1.57123	2.71102	Up	3.23e-05	0.000112329
LOC_Os07g31990	5	32	0.239961	1.57123	2.71102	Up	3.23e-05	0.000112322
LOC_Os02g25190	5	32	0.239961	1.57123	2.71102	Up	3.23e-05	0.000112315
LOC_Os07g35070	9	57	0.43193	2.79876	2.69592	Up	3.23e-06	1.33e-05
LOC_Os08g29190	6	38	0.287954	1.86584	2.69592	Up	1.77e-05	6.49e-05
LOC_Os08g01440	6	38	0.287954	1.86584	2.69592	Up	1.77e-05	6.49e-05
LOC_Os01g35300	6	38	0.287954	1.86584	2.69592	Up	1.77e-05	6.49e-05
LOC_Os09g09630	6	38	0.287954	1.86584	2.69592	Up	1.77e-05	6.49e-05
LOC_Os05g14920	6	38	0.287954	1.86584	2.69592	Up	1.77e-05	6.49e-05
LOC_Os02g31240	6	38	0.287954	1.86584	2.69592	Up	1.77e-05	6.49e-05
LOC_Os08g19030	6	38	0.287954	1.86584	2.69592	Up	1.77e-05	6.49e-05
LOC_Os08g34895	7	44	0.335946	2.16044	2.68503	Up	1.01e-05	3.87e-05
LOC_Os09g17520	7	44	0.335946	2.16044	2.68503	Up	1.01e-05	3.87e-05
LOC_Os06g41320	7	44	0.335946	2.16044	2.68503	Up	1.01e-05	3.87e-05
LOC_Os07g02380	7	44	0.335946	2.16044	2.68503	Up	1.01e-05	3.87e-05
LOC_Os12g14900	4	25	0.191969	1.22752	2.67681	Up	9.4e-05	0.000290731
LOC_Os09g15960	4	25	0.191969	1.22752	2.67681	Up	9.4e-05	0.000290714
LOC_Os07g38310	4	25	0.191969	1.22752	2.67681	Up	9.4e-05	0.000290698
LOC_Os11g18410	4	25	0.191969	1.22752	2.67681	Up	9.4e-05	0.000290681
LOC_Os02g26900	4	25	0.191969	1.22752	2.67681	Up	9.4e-05	0.000290665
LOC_Os12g08410	4	25	0.191969	1.22752	2.67681	Up	9.4e-05	0.000290648
LOC_Os02g15420	4	25	0.191969	1.22752	2.67681	Up	9.4e-05	0.000290632
LOC_Os11g01750	4	25	0.191969	1.22752	2.67681	Up	9.4e-05	0.000290615
LOC_Os06g49720	4	25	0.191969	1.22752	2.67681	Up	9.4e-05	0.000290599
LOC_Os10g23300	4	25	0.191969	1.22752	2.67681	Up	9.4e-05	0.000290582
LOC_Os10g03160	4	25	0.191969	1.22752	2.67681	Up	9.4e-05	0.000290566
LOC_Os07g36160	4	25	0.191969	1.22752	2.67681	Up	9.4e-05	0.000290549
LOC_Os03g41840	4	25	0.191969	1.22752	2.67681	Up	9.4e-05	0.000290533
LOC_Os06g18940	4	25	0.191969	1.22752	2.67681	Up	9.4e-05	0.000290516
LOC_Os06g45760	4	25	0.191969	1.22752	2.67681	Up	9.4e-05	0.0002905
LOC_Os02g16960	4	25	0.191969	1.22752	2.67681	Up	9.4e-05	0.000290483
LOC_Os05g24710	4	25	0.191969	1.22752	2.67681	Up	9.4e-05	0.000290467
LOC_Os12g14310	4	25	0.191969	1.22752	2.67681	Up	9.4e-05	0.00029045
LOC_Os02g28530	4	25	0.191969	1.22752	2.67681	Up	9.4e-05	0.000290434
LOC_Os10g18420	4	25	0.191969	1.22752	2.67681	Up	9.4e-05	0.000290417
LOC_Os02g18980	4	25	0.191969	1.22752	2.67681	Up	9.4e-05	0.000290401
LOC_Os03g22655	4	25	0.191969	1.22752	2.67681	Up	9.4e-05	0.000290384
LOC_Os09g09580	4	25	0.191969	1.22752	2.67681	Up	9.4e-05	0.000290368
LOC_Os04g10310	4	25	0.191969	1.22752	2.67681	Up	9.4e-05	0.000290351
LOC_Os07g26810	4	25	0.191969	1.22752	2.67681	Up	9.4e-05	0.000290335
LOC_Os04g43250	4	25	0.191969	1.22752	2.67681	Up	9.4e-05	0.000290318
LOC_Os03g35880	4	25	0.191969	1.22752	2.67681	Up	9.4e-05	0.000290302
LOC_Os10g38510	8	50	0.383938	2.45505	2.67681	Up	5.74e-06	2.28e-05
LOC_Os05g17800	5	31	0.239961	1.52213	2.66522	Up	3.47e-05	0.000119792
LOC_Os03g38620	5	31	0.239961	1.52213	2.66522	Up	3.47e-05	0.000119785
LOC_Os08g10990	5	31	0.239961	1.52213	2.66522	Up	3.47e-05	0.000119777
LOC_Os03g26830	5	31	0.239961	1.52213	2.66522	Up	3.47e-05	0.000119769
LOC_Os01g27010	5	31	0.239961	1.52213	2.66522	Up	3.47e-05	0.000119762
LOC_Os11g43280	5	31	0.239961	1.52213	2.66522	Up	3.47e-05	0.000119754
LOC_Os08g26770	5	31	0.239961	1.52213	2.66522	Up	3.47e-05	0.000119747
LOC_Os10g24720	5	31	0.239961	1.52213	2.66522	Up	3.47e-05	0.000119739
LOC_Os08g10560	5	31	0.239961	1.52213	2.66522	Up	3.47e-05	0.000119731
LOC_Os10g14080	5	31	0.239961	1.52213	2.66522	Up	3.47e-05	0.000119724
LOC_Os07g45630	5	31	0.239961	1.52213	2.66522	Up	3.47e-05	0.000119716
LOC_Os07g34220	5	31	0.239961	1.52213	2.66522	Up	3.47e-05	0.000119709
LOC_Os08g31820	5	31	0.239961	1.52213	2.66522	Up	3.47e-05	0.000119701
LOC_Os01g39530	5	31	0.239961	1.52213	2.66522	Up	3.47e-05	0.000119693
LOC_Os04g10830	5	31	0.239961	1.52213	2.66522	Up	3.47e-05	0.000119686
LOC_Os01g13910	5	31	0.239961	1.52213	2.66522	Up	3.47e-05	0.000119678
LOC_Os04g49710	5	31	0.239961	1.52213	2.66522	Up	3.47e-05	0.000119671
LOC_Os01g34520	5	31	0.239961	1.52213	2.66522	Up	3.47e-05	0.000119663
LOC_Os09g04020	5	31	0.239961	1.52213	2.66522	Up	3.47e-05	0.000119655
LOC_Os07g29660	5	31	0.239961	1.52213	2.66522	Up	3.47e-05	0.000119648
LOC_Os07g23010	5	31	0.239961	1.52213	2.66522	Up	3.47e-05	0.00011964
LOC_Os04g48550	5	31	0.239961	1.52213	2.66522	Up	3.47e-05	0.000119633
LOC_Os09g13670	6	37	0.287954	1.81674	2.65744	Up	1.8e-05	6.59e-05
LOC_Os03g36944	6	37	0.287954	1.81674	2.65744	Up	1.8e-05	6.59e-05
LOC_Os08g38070	6	37	0.287954	1.81674	2.65744	Up	1.8e-05	6.59e-05
LOC_Os08g04070	6	37	0.287954	1.81674	2.65744	Up	1.8e-05	6.59e-05
LOC_Os05g23300	6	37	0.287954	1.81674	2.65744	Up	1.8e-05	6.59e-05
LOC_Os11g36560	6	37	0.287954	1.81674	2.65744	Up	1.8e-05	6.59e-05
LOC_Os12g30730	6	37	0.287954	1.81674	2.65744	Up	1.8e-05	6.59e-05
LOC_Os10g41900	7	43	0.335946	2.11134	2.65186	Up	1.01e-05	3.88e-05
LOC_Os10g25840	7	43	0.335946	2.11134	2.65186	Up	1.01e-05	3.88e-05
LOC_Os03g17750	7	43	0.335946	2.11134	2.65186	Up	1.01e-05	3.88e-05
LOC_Os04g14500	7	43	0.335946	2.11134	2.65186	Up	1.01e-05	3.88e-05
LOC_Os01g08350	7	43	0.335946	2.11134	2.65186	Up	1.01e-05	3.88e-05
LOC_Os12g15530	8	49	0.383938	2.40595	2.64766	Up	5.74e-06	2.28e-05
LOC_Os07g27850	8	49	0.383938	2.40595	2.64766	Up	5.74e-06	2.28e-05
LOC_Os01g46600	30	183	1.43977	8.98548	2.64176	Up	7.72e-12	6.44e-11
LOC_Os06g46510	5	30	0.239961	1.47303	2.61791	Up	3.88e-05	0.000132422
LOC_Os08g01020	5	30	0.239961	1.47303	2.61791	Up	3.88e-05	0.000132413
LOC_Os03g39356	5	30	0.239961	1.47303	2.61791	Up	3.88e-05	0.000132405
LOC_Os04g21460	5	30	0.239961	1.47303	2.61791	Up	3.88e-05	0.000132397
LOC_Os04g13180	5	30	0.239961	1.47303	2.61791	Up	3.88e-05	0.000132388
LOC_Os01g34720	5	30	0.239961	1.47303	2.61791	Up	3.88e-05	0.00013238
LOC_Os02g18260	5	30	0.239961	1.47303	2.61791	Up	3.88e-05	0.000132372
LOC_Os10g42340	5	30	0.239961	1.47303	2.61791	Up	3.88e-05	0.000132363
LOC_Os12g39940	5	30	0.239961	1.47303	2.61791	Up	3.88e-05	0.000132355
LOC_Os11g27160	5	30	0.239961	1.47303	2.61791	Up	3.88e-05	0.000132347
LOC_Os07g14320	5	30	0.239961	1.47303	2.61791	Up	3.88e-05	0.000132338
LOC_Os04g16070	5	30	0.239961	1.47303	2.61791	Up	3.88e-05	0.00013233
LOC_Os12g15160	5	30	0.239961	1.47303	2.61791	Up	3.88e-05	0.000132322
LOC_Os11g17460	5	30	0.239961	1.47303	2.61791	Up	3.88e-05	0.000132314
LOC_Os05g14830	5	30	0.239961	1.47303	2.61791	Up	3.88e-05	0.000132305
LOC_Os03g31970	5	30	0.239961	1.47303	2.61791	Up	3.88e-05	0.000132297
LOC_Os10g26710	5	30	0.239961	1.47303	2.61791	Up	3.88e-05	0.000132289
LOC_Os10g07390	5	30	0.239961	1.47303	2.61791	Up	3.88e-05	0.00013228
LOC_Os11g02500	5	30	0.239961	1.47303	2.61791	Up	3.88e-05	0.000132272
LOC_Os02g38990	5	30	0.239961	1.47303	2.61791	Up	3.88e-05	0.000132264
LOC_Os03g43374	6	36	0.287954	1.76764	2.61791	Up	1.84e-05	6.76e-05
LOC_Os06g19670	6	36	0.287954	1.76764	2.61791	Up	1.84e-05	6.76e-05
LOC_Os05g17900	6	36	0.287954	1.76764	2.61791	Up	1.84e-05	6.76e-05
LOC_Os11g03870	6	36	0.287954	1.76764	2.61791	Up	1.84e-05	6.76e-05
LOC_Os09g21350	6	36	0.287954	1.76764	2.61791	Up	1.84e-05	6.76e-05
LOC_Os03g49290	6	36	0.287954	1.76764	2.61791	Up	1.84e-05	6.76e-05
LOC_Os02g13030	6	36	0.287954	1.76764	2.61791	Up	1.84e-05	6.76e-05
LOC_Os02g50580	6	36	0.287954	1.76764	2.61791	Up	1.84e-05	6.75e-05
LOC_Os04g32440	6	36	0.287954	1.76764	2.61791	Up	1.84e-05	6.75e-05
LOC_Os02g46550	6	36	0.287954	1.76764	2.61791	Up	1.84e-05	6.75e-05
LOC_Os10g24220	6	36	0.287954	1.76764	2.61791	Up	1.84e-05	6.75e-05
LOC_Os06g22130	6	36	0.287954	1.76764	2.61791	Up	1.84e-05	6.75e-05
LOC_Os05g17170	6	36	0.287954	1.76764	2.61791	Up	1.84e-05	6.75e-05
LOC_Os12g25520	6	36	0.287954	1.76764	2.61791	Up	1.84e-05	6.75e-05
LOC_Os03g42954	6	36	0.287954	1.76764	2.61791	Up	1.84e-05	6.75e-05
LOC_Os08g17710	6	36	0.287954	1.76764	2.61791	Up	1.84e-05	6.75e-05
LOC_Os03g20800	6	36	0.287954	1.76764	2.61791	Up	1.84e-05	6.75e-05
LOC_Os07g13180	7	42	0.335946	2.06224	2.61791	Up	1.02e-05	3.9e-05
LOC_Os09g27980	7	42	0.335946	2.06224	2.61791	Up	1.02e-05	3.9e-05
LOC_Os12g02410	7	42	0.335946	2.06224	2.61791	Up	1.02e-05	3.9e-05
LOC_Os05g43400	7	42	0.335946	2.06224	2.61791	Up	1.02e-05	3.9e-05
LOC_Os03g21770	7	42	0.335946	2.06224	2.61791	Up	1.02e-05	3.9e-05
LOC_Os11g34340	8	48	0.383938	2.35685	2.61791	Up	5.75e-06	2.29e-05
LOC_Os05g15280	4	24	0.191969	1.17842	2.61791	Up	0.000129183	0.000385235
LOC_Os04g01400	4	24	0.191969	1.17842	2.61791	Up	0.000129183	0.000385214
LOC_Os12g17110	4	24	0.191969	1.17842	2.61791	Up	0.000129183	0.000385192
LOC_Os04g19760	4	24	0.191969	1.17842	2.61791	Up	0.000129183	0.000385171
LOC_Os12g03770	4	24	0.191969	1.17842	2.61791	Up	0.000129183	0.00038515
LOC_Os12g42480	4	24	0.191969	1.17842	2.61791	Up	0.000129183	0.000385129
LOC_Os10g02314	4	24	0.191969	1.17842	2.61791	Up	0.000129183	0.000385108
LOC_Os04g22400	4	24	0.191969	1.17842	2.61791	Up	0.000129183	0.000385087
LOC_Os03g43220	4	24	0.191969	1.17842	2.61791	Up	0.000129183	0.000385066
LOC_Os08g15530	4	24	0.191969	1.17842	2.61791	Up	0.000129183	0.000385045
LOC_Os02g04360	4	24	0.191969	1.17842	2.61791	Up	0.000129183	0.000385024
LOC_Os11g15300	4	24	0.191969	1.17842	2.61791	Up	0.000129183	0.000385002
LOC_Os01g31280	4	24	0.191969	1.17842	2.61791	Up	0.000129183	0.000384981
LOC_Os01g35600	4	24	0.191969	1.17842	2.61791	Up	0.000129183	0.00038496
LOC_Os02g36060	4	24	0.191969	1.17842	2.61791	Up	0.000129183	0.000384939
LOC_Os02g18560	4	24	0.191969	1.17842	2.61791	Up	0.000129183	0.000384918
LOC_Os10g09950	4	24	0.191969	1.17842	2.61791	Up	0.000129183	0.000384897
LOC_Os11g15020	4	24	0.191969	1.17842	2.61791	Up	0.000129183	0.000384876
LOC_Os09g10900	4	24	0.191969	1.17842	2.61791	Up	0.000129183	0.000384855
LOC_Os06g22160	4	24	0.191969	1.17842	2.61791	Up	0.000129183	0.000384834
LOC_Os11g40560	4	24	0.191969	1.17842	2.61791	Up	0.000129183	0.000384813
LOC_Os05g31410	4	24	0.191969	1.17842	2.61791	Up	0.000129183	0.000384792
LOC_Os02g47270	4	24	0.191969	1.17842	2.61791	Up	0.000129183	0.000384771
LOC_Os09g02510	4	24	0.191969	1.17842	2.61791	Up	0.000129183	0.00038475
LOC_Os09g08060	4	24	0.191969	1.17842	2.61791	Up	0.000129183	0.000384728
LOC_Os06g43010	4	24	0.191969	1.17842	2.61791	Up	0.000129183	0.000384707
LOC_Os02g20760	4	24	0.191969	1.17842	2.61791	Up	0.000129183	0.000384686
LOC_Os06g36970	4	24	0.191969	1.17842	2.61791	Up	0.000129183	0.000384665
LOC_Os01g50670	4	24	0.191969	1.17842	2.61791	Up	0.000129183	0.000384644
LOC_Os03g42970	4	24	0.191969	1.17842	2.61791	Up	0.000129183	0.000384623
LOC_Os12g23390	4	24	0.191969	1.17842	2.61791	Up	0.000129183	0.000384602
LOC_Os06g22470	4	24	0.191969	1.17842	2.61791	Up	0.000129183	0.000384581
LOC_Os04g22280	4	24	0.191969	1.17842	2.61791	Up	0.000129183	0.00038456
LOC_Os04g22870	4	24	0.191969	1.17842	2.61791	Up	0.000129183	0.000384539
LOC_Os07g26010	4	24	0.191969	1.17842	2.61791	Up	0.000129183	0.000384518
LOC_Os02g16310	4	24	0.191969	1.17842	2.61791	Up	0.000129183	0.000384497
LOC_Os03g03230	4	24	0.191969	1.17842	2.61791	Up	0.000129183	0.000384476
LOC_Os01g39210	4	24	0.191969	1.17842	2.61791	Up	0.000129183	0.000384455
LOC_Os03g49410	4	24	0.191969	1.17842	2.61791	Up	0.000129183	0.000384434
LOC_Os05g17060	4	24	0.191969	1.17842	2.61791	Up	0.000129183	0.000384413
LOC_Os08g14195	9	53	0.43193	2.60235	2.59095	Up	3.24e-06	1.33e-05
LOC_Os03g17720	8	47	0.383938	2.30775	2.58754	Up	5.76e-06	2.29e-05
LOC_Os01g58010	8	47	0.383938	2.30775	2.58754	Up	5.76e-06	2.29e-05
LOC_Os05g46070	7	41	0.335946	2.01314	2.58315	Up	1.03e-05	3.94e-05
LOC_Os06g12760	7	41	0.335946	2.01314	2.58315	Up	1.03e-05	3.94e-05
LOC_Os11g32840	7	41	0.335946	2.01314	2.58315	Up	1.03e-05	3.94e-05
LOC_Os05g17020	7	41	0.335946	2.01314	2.58315	Up	1.03e-05	3.94e-05
LOC_Os03g47614	6	35	0.287954	1.71853	2.57727	Up	1.93e-05	7.04e-05
LOC_Os11g09520	6	35	0.287954	1.71853	2.57727	Up	1.93e-05	7.04e-05
LOC_Os01g70650	6	35	0.287954	1.71853	2.57727	Up	1.93e-05	7.04e-05
LOC_Os07g40360	6	35	0.287954	1.71853	2.57727	Up	1.93e-05	7.04e-05
LOC_Os10g03580	6	35	0.287954	1.71853	2.57727	Up	1.93e-05	7.04e-05
LOC_Os07g06720	6	35	0.287954	1.71853	2.57727	Up	1.93e-05	7.04e-05
LOC_Os05g25500	6	35	0.287954	1.71853	2.57727	Up	1.93e-05	7.04e-05
LOC_Os07g09210	6	35	0.287954	1.71853	2.57727	Up	1.93e-05	7.04e-05
LOC_Os07g44980	6	35	0.287954	1.71853	2.57727	Up	1.93e-05	7.04e-05
LOC_Os03g32290	6	35	0.287954	1.71853	2.57727	Up	1.93e-05	7.04e-05
LOC_Os02g18290	6	35	0.287954	1.71853	2.57727	Up	1.93e-05	7.04e-05
LOC_Os05g27080	6	35	0.287954	1.71853	2.57727	Up	1.93e-05	7.04e-05
LOC_Os03g43950	6	35	0.287954	1.71853	2.57727	Up	1.93e-05	7.03e-05
LOC_Os03g20240	5	29	0.239961	1.42393	2.569	Up	4.59e-05	0.000154963
LOC_Os08g20240	5	29	0.239961	1.42393	2.569	Up	4.59e-05	0.000154953
LOC_Os08g33600	5	29	0.239961	1.42393	2.569	Up	4.59e-05	0.000154944
LOC_Os03g37710	5	29	0.239961	1.42393	2.569	Up	4.59e-05	0.000154934
LOC_Os01g31130	5	29	0.239961	1.42393	2.569	Up	4.59e-05	0.000154925
LOC_Os01g38570	5	29	0.239961	1.42393	2.569	Up	4.59e-05	0.000154915
LOC_Os01g13970	5	29	0.239961	1.42393	2.569	Up	4.59e-05	0.000154905
LOC_Os04g27170	5	29	0.239961	1.42393	2.569	Up	4.59e-05	0.000154896
LOC_Os11g22820	5	29	0.239961	1.42393	2.569	Up	4.59e-05	0.000154886
LOC_Os06g21320	5	29	0.239961	1.42393	2.569	Up	4.59e-05	0.000154877
LOC_Os11g17130	5	29	0.239961	1.42393	2.569	Up	4.59e-05	0.000154867
LOC_Os10g19810	5	29	0.239961	1.42393	2.569	Up	4.59e-05	0.000154857
LOC_Os03g29280	5	29	0.239961	1.42393	2.569	Up	4.59e-05	0.000154848
LOC_Os04g06830	5	29	0.239961	1.42393	2.569	Up	4.59e-05	0.000154838
LOC_Os11g27780	5	29	0.239961	1.42393	2.569	Up	4.59e-05	0.000154829
LOC_Os09g12210	5	29	0.239961	1.42393	2.569	Up	4.59e-05	0.000154819
LOC_Os07g42680	5	29	0.239961	1.42393	2.569	Up	4.59e-05	0.000154809
LOC_Os06g02080	5	29	0.239961	1.42393	2.569	Up	4.59e-05	0.0001548
LOC_Os09g20470	5	29	0.239961	1.42393	2.569	Up	4.59e-05	0.00015479
LOC_Os05g23790	5	29	0.239961	1.42393	2.569	Up	4.59e-05	0.000154781
LOC_Os05g02290	5	29	0.239961	1.42393	2.569	Up	4.59e-05	0.000154771
LOC_Os01g28490	5	29	0.239961	1.42393	2.569	Up	4.59e-05	0.000154762
LOC_Os04g26930	5	29	0.239961	1.42393	2.569	Up	4.59e-05	0.000154752
LOC_Os11g26110	5	29	0.239961	1.42393	2.569	Up	4.59e-05	0.000154742
LOC_Os06g43070	5	29	0.239961	1.42393	2.569	Up	4.59e-05	0.000154733
LOC_Os12g23770	5	29	0.239961	1.42393	2.569	Up	4.59e-05	0.000154723
LOC_Os10g09180	5	29	0.239961	1.42393	2.569	Up	4.59e-05	0.000154714
LOC_Os01g15590	5	29	0.239961	1.42393	2.569	Up	4.59e-05	0.000154704
LOC_Os11g19650	5	29	0.239961	1.42393	2.569	Up	4.59e-05	0.000154694
LOC_Os05g28490	5	29	0.239961	1.42393	2.569	Up	4.59e-05	0.000154685
LOC_Os02g25500	5	29	0.239961	1.42393	2.569	Up	4.59e-05	0.000154675
LOC_Os02g27660	5	29	0.239961	1.42393	2.569	Up	4.59e-05	0.000154666
LOC_Os12g26280	5	29	0.239961	1.42393	2.569	Up	4.59e-05	0.000154656
LOC_Os11g10010	5	29	0.239961	1.42393	2.569	Up	4.59e-05	0.000154647
LOC_Os11g34580	5	29	0.239961	1.42393	2.569	Up	4.59e-05	0.000154637
LOC_Os06g25410	5	29	0.239961	1.42393	2.569	Up	4.59e-05	0.000154627
LOC_Os11g38470	5	29	0.239961	1.42393	2.569	Up	4.59e-05	0.000154618
LOC_Os03g63780	5	29	0.239961	1.42393	2.569	Up	4.59e-05	0.000154608
LOC_Os09g06480	5	29	0.239961	1.42393	2.569	Up	4.59e-05	0.000154599
LOC_Os04g17970	5	29	0.239961	1.42393	2.569	Up	4.59e-05	0.000154589
LOC_Os10g21196	9	52	0.43193	2.55325	2.56346	Up	3.24e-06	1.33e-05
LOC_Os07g09070	4	23	0.191969	1.12932	2.55651	Up	0.000190465	0.000544007
LOC_Os11g31610	4	23	0.191969	1.12932	2.55651	Up	0.000190465	0.000543978
LOC_Os12g30460	4	23	0.191969	1.12932	2.55651	Up	0.000190465	0.00054395
LOC_Os03g07690	4	23	0.191969	1.12932	2.55651	Up	0.000190465	0.000543921
LOC_Os08g13080	4	23	0.191969	1.12932	2.55651	Up	0.000190465	0.000543893
LOC_Os08g27460	4	23	0.191969	1.12932	2.55651	Up	0.000190465	0.000543864
LOC_Os04g40240	4	23	0.191969	1.12932	2.55651	Up	0.000190465	0.000543836
LOC_Os09g09590	4	23	0.191969	1.12932	2.55651	Up	0.000190465	0.000543807
LOC_Os06g05050	4	23	0.191969	1.12932	2.55651	Up	0.000190465	0.000543778
LOC_Os06g22110	4	23	0.191969	1.12932	2.55651	Up	0.000190465	0.00054375
LOC_Os01g48470	4	23	0.191969	1.12932	2.55651	Up	0.000190465	0.000543721
LOC_Os04g50172	4	23	0.191969	1.12932	2.55651	Up	0.000190465	0.000543693
LOC_Os08g06400	4	23	0.191969	1.12932	2.55651	Up	0.000190465	0.000543664
LOC_Os03g37234	4	23	0.191969	1.12932	2.55651	Up	0.000190465	0.000543636
LOC_Os11g22680	4	23	0.191969	1.12932	2.55651	Up	0.000190465	0.000543607
LOC_Os07g11080	4	23	0.191969	1.12932	2.55651	Up	0.000190465	0.000543579
LOC_Os08g19920	4	23	0.191969	1.12932	2.55651	Up	0.000190465	0.00054355
LOC_Os03g41470	4	23	0.191969	1.12932	2.55651	Up	0.000190465	0.000543522
LOC_Os06g31150	4	23	0.191969	1.12932	2.55651	Up	0.000190465	0.000543493
LOC_Os07g39600	4	23	0.191969	1.12932	2.55651	Up	0.000190465	0.000543465
LOC_Os07g24810	4	23	0.191969	1.12932	2.55651	Up	0.000190465	0.000543436
LOC_Os03g40430	4	23	0.191969	1.12932	2.55651	Up	0.000190465	0.000543408
LOC_Os10g24110	4	23	0.191969	1.12932	2.55651	Up	0.000190465	0.000543379
LOC_Os10g04460	4	23	0.191969	1.12932	2.55651	Up	0.000190465	0.000543351
LOC_Os08g42820	4	23	0.191969	1.12932	2.55651	Up	0.000190465	0.000543322
LOC_Os05g34750	4	23	0.191969	1.12932	2.55651	Up	0.000190465	0.000543294
LOC_Os11g19550	4	23	0.191969	1.12932	2.55651	Up	0.000190465	0.000543265
LOC_Os08g15440	4	23	0.191969	1.12932	2.55651	Up	0.000190465	0.000543237
LOC_Os10g34630	4	23	0.191969	1.12932	2.55651	Up	0.000190465	0.000543208
LOC_Os03g41970	4	23	0.191969	1.12932	2.55651	Up	0.000190465	0.00054318
LOC_Os02g22710	4	23	0.191969	1.12932	2.55651	Up	0.000190465	0.000543151
LOC_Os10g06980	4	23	0.191969	1.12932	2.55651	Up	0.000190465	0.000543123
LOC_Os06g38880	4	23	0.191969	1.12932	2.55651	Up	0.000190465	0.000543094
LOC_Os07g29720	4	23	0.191969	1.12932	2.55651	Up	0.000190465	0.000543066
LOC_Os07g28450	4	23	0.191969	1.12932	2.55651	Up	0.000190465	0.000543038
LOC_Os12g09680	4	23	0.191969	1.12932	2.55651	Up	0.000190465	0.000543009
LOC_Os06g14650	4	23	0.191969	1.12932	2.55651	Up	0.000190465	0.000542981
LOC_Os10g32260	4	23	0.191969	1.12932	2.55651	Up	0.000190465	0.000542952
LOC_Os05g23480	4	23	0.191969	1.12932	2.55651	Up	0.000190465	0.000542924
LOC_Os12g36120	4	23	0.191969	1.12932	2.55651	Up	0.000190465	0.000542895
LOC_Os06g35860	4	23	0.191969	1.12932	2.55651	Up	0.000190465	0.000542867
LOC_Os12g35510	4	23	0.191969	1.12932	2.55651	Up	0.000190465	0.000542838
LOC_Os04g16390	4	23	0.191969	1.12932	2.55651	Up	0.000190465	0.00054281
LOC_Os05g42444	4	23	0.191969	1.12932	2.55651	Up	0.000190465	0.000542781
LOC_Os07g33190	4	23	0.191969	1.12932	2.55651	Up	0.000190465	0.000542753
LOC_Os01g28630	4	23	0.191969	1.12932	2.55651	Up	0.000190465	0.000542725
LOC_Os03g33030	4	23	0.191969	1.12932	2.55651	Up	0.000190465	0.000542696
LOC_Os11g39440	4	23	0.191969	1.12932	2.55651	Up	0.000190465	0.000542668
LOC_Os10g17270	4	23	0.191969	1.12932	2.55651	Up	0.000190465	0.000542639
LOC_Os02g28910	4	23	0.191969	1.12932	2.55651	Up	0.000190465	0.000542611
LOC_Os06g10010	4	23	0.191969	1.12932	2.55651	Up	0.000190465	0.000542583
LOC_Os01g03800	8	46	0.383938	2.25865	2.55651	Up	5.78e-06	2.3e-05
LOC_Os09g03860	7	40	0.335946	1.96404	2.54752	Up	1.05e-05	4e-05
LOC_Os09g36330	7	40	0.335946	1.96404	2.54752	Up	1.05e-05	4e-05
LOC_Os11g38890	7	40	0.335946	1.96404	2.54752	Up	1.05e-05	4e-05
LOC_Os07g06930	7	40	0.335946	1.96404	2.54752	Up	1.05e-05	4e-05
LOC_Os03g53090	7	40	0.335946	1.96404	2.54752	Up	1.05e-05	4e-05
LOC_Os01g04180	7	40	0.335946	1.96404	2.54752	Up	1.05e-05	4e-05
LOC_Os01g66060	7	40	0.335946	1.96404	2.54752	Up	1.05e-05	4e-05
LOC_Os10g25180	7	40	0.335946	1.96404	2.54752	Up	1.05e-05	4e-05
LOC_Os07g36790	10	57	0.479923	2.79876	2.54391	Up	1.81e-06	7.71e-06
LOC_Os12g34096	9	51	0.43193	2.50415	2.53545	Up	3.25e-06	1.33e-05
LOC_Os02g28500	6	34	0.287954	1.66943	2.53545	Up	2.08e-05	7.54e-05
LOC_Os02g27130	6	34	0.287954	1.66943	2.53545	Up	2.08e-05	7.54e-05
LOC_Os01g35030	6	34	0.287954	1.66943	2.53545	Up	2.08e-05	7.54e-05
LOC_Os03g30100	6	34	0.287954	1.66943	2.53545	Up	2.08e-05	7.54e-05
LOC_Os04g18990	6	34	0.287954	1.66943	2.53545	Up	2.08e-05	7.54e-05
LOC_Os04g35830	6	34	0.287954	1.66943	2.53545	Up	2.08e-05	7.54e-05
LOC_Os02g21900	6	34	0.287954	1.66943	2.53545	Up	2.08e-05	7.54e-05
LOC_Os04g48240	6	34	0.287954	1.66943	2.53545	Up	2.08e-05	7.54e-05
LOC_Os06g11304	6	34	0.287954	1.66943	2.53545	Up	2.08e-05	7.54e-05
LOC_Os01g13960	6	34	0.287954	1.66943	2.53545	Up	2.08e-05	7.54e-05
LOC_Os07g10270	6	34	0.287954	1.66943	2.53545	Up	2.08e-05	7.54e-05
LOC_Os12g28020	6	34	0.287954	1.66943	2.53545	Up	2.08e-05	7.54e-05
LOC_Os01g63670	6	34	0.287954	1.66943	2.53545	Up	2.08e-05	7.54e-05
LOC_Os01g25980	6	34	0.287954	1.66943	2.53545	Up	2.08e-05	7.54e-05
LOC_Os03g17410	6	34	0.287954	1.66943	2.53545	Up	2.08e-05	7.53e-05
LOC_Os04g04100	6	34	0.287954	1.66943	2.53545	Up	2.08e-05	7.53e-05
LOC_Os06g39250	6	34	0.287954	1.66943	2.53545	Up	2.08e-05	7.53e-05
LOC_Os03g43070	6	34	0.287954	1.66943	2.53545	Up	2.08e-05	7.53e-05
LOC_Os03g47670	8	45	0.383938	2.20954	2.5248	Up	5.82e-06	2.31e-05
LOC_Os10g11250	5	28	0.239961	1.37483	2.51838	Up	5.84e-05	0.000190816
LOC_Os04g19550	5	28	0.239961	1.37483	2.51838	Up	5.84e-05	0.000190805
LOC_Os03g28950	5	28	0.239961	1.37483	2.51838	Up	5.84e-05	0.000190793
LOC_Os01g54640	5	28	0.239961	1.37483	2.51838	Up	5.84e-05	0.000190782
LOC_Os12g12020	5	28	0.239961	1.37483	2.51838	Up	5.84e-05	0.00019077
LOC_Os12g05151	5	28	0.239961	1.37483	2.51838	Up	5.84e-05	0.000190759
LOC_Os08g33980	5	28	0.239961	1.37483	2.51838	Up	5.84e-05	0.000190747
LOC_Os04g21330	5	28	0.239961	1.37483	2.51838	Up	5.84e-05	0.000190736
LOC_Os02g26270	5	28	0.239961	1.37483	2.51838	Up	5.84e-05	0.000190724
LOC_Os12g26920	5	28	0.239961	1.37483	2.51838	Up	5.84e-05	0.000190713
LOC_Os05g18810	5	28	0.239961	1.37483	2.51838	Up	5.84e-05	0.000190701
LOC_Os05g39330	5	28	0.239961	1.37483	2.51838	Up	5.84e-05	0.00019069
LOC_Os03g42360	5	28	0.239961	1.37483	2.51838	Up	5.84e-05	0.000190679
LOC_Os12g19250	5	28	0.239961	1.37483	2.51838	Up	5.84e-05	0.000190667
LOC_Os12g08960	5	28	0.239961	1.37483	2.51838	Up	5.84e-05	0.000190656
LOC_Os02g21130	5	28	0.239961	1.37483	2.51838	Up	5.84e-05	0.000190644
LOC_Os11g40284	5	28	0.239961	1.37483	2.51838	Up	5.84e-05	0.000190633
LOC_Os02g21760	5	28	0.239961	1.37483	2.51838	Up	5.84e-05	0.000190621
LOC_Os12g09180	5	28	0.239961	1.37483	2.51838	Up	5.84e-05	0.00019061
LOC_Os04g18190	5	28	0.239961	1.37483	2.51838	Up	5.84e-05	0.000190598
LOC_Os08g15690	5	28	0.239961	1.37483	2.51838	Up	5.84e-05	0.000190587
LOC_Os06g40290	5	28	0.239961	1.37483	2.51838	Up	5.84e-05	0.000190575
LOC_Os05g20600	5	28	0.239961	1.37483	2.51838	Up	5.84e-05	0.000190564
LOC_Os04g07880	5	28	0.239961	1.37483	2.51838	Up	5.84e-05	0.000190553
LOC_Os03g20040	5	28	0.239961	1.37483	2.51838	Up	5.84e-05	0.000190541
LOC_Os06g37650	5	28	0.239961	1.37483	2.51838	Up	5.84e-05	0.00019053
LOC_Os12g25840	5	28	0.239961	1.37483	2.51838	Up	5.84e-05	0.000190518
LOC_Os10g21510	5	28	0.239961	1.37483	2.51838	Up	5.84e-05	0.000190507
LOC_Os08g22810	5	28	0.239961	1.37483	2.51838	Up	5.84e-05	0.000190495
LOC_Os01g31860	5	28	0.239961	1.37483	2.51838	Up	5.84e-05	0.000190484
LOC_Os05g20890	5	28	0.239961	1.37483	2.51838	Up	5.84e-05	0.000190473
LOC_Os02g47700	5	28	0.239961	1.37483	2.51838	Up	5.84e-05	0.000190461
LOC_Os03g43460	5	28	0.239961	1.37483	2.51838	Up	5.84e-05	0.00019045
LOC_Os01g26410	5	28	0.239961	1.37483	2.51838	Up	5.84e-05	0.000190438
LOC_Os04g27710	5	28	0.239961	1.37483	2.51838	Up	5.84e-05	0.000190427
LOC_Os02g25560	5	28	0.239961	1.37483	2.51838	Up	5.84e-05	0.000190415
LOC_Os02g15830	5	28	0.239961	1.37483	2.51838	Up	5.84e-05	0.000190404
LOC_Os06g24470	5	28	0.239961	1.37483	2.51838	Up	5.84e-05	0.000190393
LOC_Os03g41650	7	39	0.335946	1.91494	2.511	Up	1.08e-05	4.11e-05
LOC_Os04g02300	7	39	0.335946	1.91494	2.511	Up	1.08e-05	4.11e-05
LOC_Os08g44060	7	39	0.335946	1.91494	2.511	Up	1.08e-05	4.11e-05
LOC_Os10g11170	7	39	0.335946	1.91494	2.511	Up	1.08e-05	4.11e-05
LOC_Os11g09210	7	39	0.335946	1.91494	2.511	Up	1.08e-05	4.11e-05
LOC_Os02g53910	7	39	0.335946	1.91494	2.511	Up	1.08e-05	4.11e-05
LOC_Os05g41570	6	33	0.287954	1.62033	2.49238	Up	2.33e-05	8.38e-05
LOC_Os11g41470	6	33	0.287954	1.62033	2.49238	Up	2.33e-05	8.38e-05
LOC_Os05g51310	6	33	0.287954	1.62033	2.49238	Up	2.33e-05	8.38e-05
LOC_Os12g18820	6	33	0.287954	1.62033	2.49238	Up	2.33e-05	8.38e-05
LOC_Os09g11740	6	33	0.287954	1.62033	2.49238	Up	2.33e-05	8.38e-05
LOC_Os10g10510	6	33	0.287954	1.62033	2.49238	Up	2.33e-05	8.38e-05
LOC_Os10g13830	6	33	0.287954	1.62033	2.49238	Up	2.33e-05	8.38e-05
LOC_Os10g31090	6	33	0.287954	1.62033	2.49238	Up	2.33e-05	8.38e-05
LOC_Os05g18000	6	33	0.287954	1.62033	2.49238	Up	2.33e-05	8.38e-05
LOC_Os06g32300	6	33	0.287954	1.62033	2.49238	Up	2.33e-05	8.38e-05
LOC_Os12g03120	6	33	0.287954	1.62033	2.49238	Up	2.33e-05	8.38e-05
LOC_Os04g02630	6	33	0.287954	1.62033	2.49238	Up	2.33e-05	8.38e-05
LOC_Os09g06200	6	33	0.287954	1.62033	2.49238	Up	2.33e-05	8.38e-05
LOC_Os02g22180	6	33	0.287954	1.62033	2.49238	Up	2.33e-05	8.37e-05
LOC_Os04g27760	6	33	0.287954	1.62033	2.49238	Up	2.33e-05	8.37e-05
LOC_Os03g01450	6	33	0.287954	1.62033	2.49238	Up	2.33e-05	8.37e-05
LOC_Os11g35690	6	33	0.287954	1.62033	2.49238	Up	2.33e-05	8.37e-05
LOC_Os06g12180	6	33	0.287954	1.62033	2.49238	Up	2.33e-05	8.37e-05
LOC_Os10g38276	10	55	0.479923	2.70055	2.49238	Up	1.81e-06	7.73e-06
LOC_Os05g16180	4	22	0.191969	1.08022	2.49238	Up	0.000296734	0.000808521
LOC_Os02g52970	4	22	0.191969	1.08022	2.49238	Up	0.000296734	0.00080848
LOC_Os04g08580	4	22	0.191969	1.08022	2.49238	Up	0.000296734	0.00080844
LOC_Os10g08060	4	22	0.191969	1.08022	2.49238	Up	0.000296734	0.000808399
LOC_Os05g35090	4	22	0.191969	1.08022	2.49238	Up	0.000296734	0.000808359
LOC_Os11g16250	4	22	0.191969	1.08022	2.49238	Up	0.000296734	0.000808318
LOC_Os04g53090	4	22	0.191969	1.08022	2.49238	Up	0.000296734	0.000808278
LOC_Os04g23030	4	22	0.191969	1.08022	2.49238	Up	0.000296734	0.000808237
LOC_Os01g37325	4	22	0.191969	1.08022	2.49238	Up	0.000296734	0.000808197
LOC_Os11g18540	4	22	0.191969	1.08022	2.49238	Up	0.000296734	0.000808156
LOC_Os10g09250	4	22	0.191969	1.08022	2.49238	Up	0.000296734	0.000808116
LOC_Os11g18600	4	22	0.191969	1.08022	2.49238	Up	0.000296734	0.000808075
LOC_Os12g24070	4	22	0.191969	1.08022	2.49238	Up	0.000296734	0.000808035
LOC_Os04g15870	4	22	0.191969	1.08022	2.49238	Up	0.000296734	0.000807995
LOC_Os02g18440	4	22	0.191969	1.08022	2.49238	Up	0.000296734	0.000807954
LOC_Os11g22270	4	22	0.191969	1.08022	2.49238	Up	0.000296734	0.000807914
LOC_Os03g27940	4	22	0.191969	1.08022	2.49238	Up	0.000296734	0.000807873
LOC_Os09g12440	4	22	0.191969	1.08022	2.49238	Up	0.000296734	0.000807833
LOC_Os10g08090	4	22	0.191969	1.08022	2.49238	Up	0.000296734	0.000807792
LOC_Os05g22450	4	22	0.191969	1.08022	2.49238	Up	0.000296734	0.000807752
LOC_Os02g14220	4	22	0.191969	1.08022	2.49238	Up	0.000296734	0.000807712
LOC_Os04g49020	4	22	0.191969	1.08022	2.49238	Up	0.000296734	0.000807671
LOC_Os04g17980	4	22	0.191969	1.08022	2.49238	Up	0.000296734	0.000807631
LOC_Os06g29250	4	22	0.191969	1.08022	2.49238	Up	0.000296734	0.00080759
LOC_Os09g03790	4	22	0.191969	1.08022	2.49238	Up	0.000296734	0.00080755
LOC_Os08g11150	4	22	0.191969	1.08022	2.49238	Up	0.000296734	0.00080751
LOC_Os06g03450	4	22	0.191969	1.08022	2.49238	Up	0.000296734	0.000807469
LOC_Os07g47880	4	22	0.191969	1.08022	2.49238	Up	0.000296734	0.000807429
LOC_Os05g08660	4	22	0.191969	1.08022	2.49238	Up	0.000296734	0.000807388
LOC_Os12g27720	4	22	0.191969	1.08022	2.49238	Up	0.000296734	0.000807348
LOC_Os11g17370	4	22	0.191969	1.08022	2.49238	Up	0.000296734	0.000807308
LOC_Os02g24690	4	22	0.191969	1.08022	2.49238	Up	0.000296734	0.000807267
LOC_Os01g23420	4	22	0.191969	1.08022	2.49238	Up	0.000296734	0.000807227
LOC_Os09g16170	4	22	0.191969	1.08022	2.49238	Up	0.000296734	0.000807187
LOC_Os07g05860	4	22	0.191969	1.08022	2.49238	Up	0.000296734	0.000807146
LOC_Os11g19040	4	22	0.191969	1.08022	2.49238	Up	0.000296734	0.000807106
LOC_Os12g34014	15	82	0.719884	4.02628	2.48361	Up	8.9e-08	4.44e-07
LOC_Os01g04610	9	49	0.43193	2.40595	2.47774	Up	3.27e-06	1.34e-05
LOC_Os09g22470	9	49	0.43193	2.40595	2.47774	Up	3.27e-06	1.34e-05
LOC_Os08g09700	7	38	0.335946	1.86584	2.47352	Up	1.13e-05	4.3e-05
LOC_Os10g31080	7	38	0.335946	1.86584	2.47352	Up	1.13e-05	4.3e-05
LOC_Os07g11230	7	38	0.335946	1.86584	2.47352	Up	1.13e-05	4.3e-05
LOC_Os08g08150	7	38	0.335946	1.86584	2.47352	Up	1.13e-05	4.3e-05
LOC_Os02g41690	7	38	0.335946	1.86584	2.47352	Up	1.13e-05	4.3e-05
LOC_Os07g45980	7	38	0.335946	1.86584	2.47352	Up	1.13e-05	4.3e-05
LOC_Os02g22170	7	38	0.335946	1.86584	2.47352	Up	1.13e-05	4.3e-05
LOC_Os05g12230	7	38	0.335946	1.86584	2.47352	Up	1.13e-05	4.3e-05
LOC_Os12g10530	7	38	0.335946	1.86584	2.47352	Up	1.13e-05	4.3e-05
LOC_Os05g15740	7	38	0.335946	1.86584	2.47352	Up	1.13e-05	4.3e-05
LOC_Os05g00992	5	27	0.239961	1.32573	2.46591	Up	7.98e-05	0.00025135
LOC_Os02g43960	5	27	0.239961	1.32573	2.46591	Up	7.98e-05	0.000251336
LOC_Os07g12430	5	27	0.239961	1.32573	2.46591	Up	7.98e-05	0.000251321
LOC_Os08g12110	5	27	0.239961	1.32573	2.46591	Up	7.98e-05	0.000251307
LOC_Os03g48980	5	27	0.239961	1.32573	2.46591	Up	7.98e-05	0.000251292
LOC_Os03g40470	5	27	0.239961	1.32573	2.46591	Up	7.98e-05	0.000251278
LOC_Os05g15460	5	27	0.239961	1.32573	2.46591	Up	7.98e-05	0.000251263
LOC_Os10g06070	5	27	0.239961	1.32573	2.46591	Up	7.98e-05	0.000251248
LOC_Os09g10865	5	27	0.239961	1.32573	2.46591	Up	7.98e-05	0.000251234
LOC_Os09g18260	5	27	0.239961	1.32573	2.46591	Up	7.98e-05	0.000251219
LOC_Os08g26400	5	27	0.239961	1.32573	2.46591	Up	7.98e-05	0.000251205
LOC_Os02g29200	5	27	0.239961	1.32573	2.46591	Up	7.98e-05	0.00025119
LOC_Os11g17060	5	27	0.239961	1.32573	2.46591	Up	7.98e-05	0.000251176
LOC_Os04g18480	5	27	0.239961	1.32573	2.46591	Up	7.98e-05	0.000251161
LOC_Os07g33760	5	27	0.239961	1.32573	2.46591	Up	7.98e-05	0.000251147
LOC_Os01g01270	5	27	0.239961	1.32573	2.46591	Up	7.98e-05	0.000251132
LOC_Os09g03220	5	27	0.239961	1.32573	2.46591	Up	7.98e-05	0.000251118
LOC_Os04g02200	5	27	0.239961	1.32573	2.46591	Up	7.98e-05	0.000251103
LOC_Os04g04710	5	27	0.239961	1.32573	2.46591	Up	7.98e-05	0.000251089
LOC_Os09g22060	5	27	0.239961	1.32573	2.46591	Up	7.98e-05	0.000251074
LOC_Os10g24150	5	27	0.239961	1.32573	2.46591	Up	7.98e-05	0.00025106
LOC_Os02g22230	5	27	0.239961	1.32573	2.46591	Up	7.98e-05	0.000251045
LOC_Os01g27430	5	27	0.239961	1.32573	2.46591	Up	7.98e-05	0.000251031
LOC_Os10g26000	5	27	0.239961	1.32573	2.46591	Up	7.98e-05	0.000251016
LOC_Os09g15210	5	27	0.239961	1.32573	2.46591	Up	7.98e-05	0.000251002
LOC_Os03g24790	5	27	0.239961	1.32573	2.46591	Up	7.98e-05	0.000250987
LOC_Os07g15910	5	27	0.239961	1.32573	2.46591	Up	7.98e-05	0.000250973
LOC_Os03g41800	5	27	0.239961	1.32573	2.46591	Up	7.98e-05	0.000250958
LOC_Os10g42160	5	27	0.239961	1.32573	2.46591	Up	7.98e-05	0.000250943
LOC_Os12g33710	5	27	0.239961	1.32573	2.46591	Up	7.98e-05	0.000250929
LOC_Os01g53870	5	27	0.239961	1.32573	2.46591	Up	7.98e-05	0.000250914
LOC_Os10g16500	5	27	0.239961	1.32573	2.46591	Up	7.98e-05	0.0002509
LOC_Os07g27220	5	27	0.239961	1.32573	2.46591	Up	7.98e-05	0.000250885
LOC_Os03g28380	5	27	0.239961	1.32573	2.46591	Up	7.98e-05	0.000250871
LOC_Os08g15310	5	27	0.239961	1.32573	2.46591	Up	7.98e-05	0.000250856
LOC_Os12g19650	5	27	0.239961	1.32573	2.46591	Up	7.98e-05	0.000250842
LOC_Os12g30840	5	27	0.239961	1.32573	2.46591	Up	7.98e-05	0.000250828
LOC_Os02g13700	8	43	0.383938	2.11134	2.45921	Up	6e-06	2.38e-05
LOC_Os07g01770	8	43	0.383938	2.11134	2.45921	Up	6e-06	2.38e-05
LOC_Os12g34810	6	32	0.287954	1.57123	2.44799	Up	2.77e-05	9.83e-05
LOC_Os06g35760	6	32	0.287954	1.57123	2.44799	Up	2.77e-05	9.83e-05
LOC_Os07g23230	6	32	0.287954	1.57123	2.44799	Up	2.77e-05	9.83e-05
LOC_Os03g27890	6	32	0.287954	1.57123	2.44799	Up	2.77e-05	9.83e-05
LOC_Os10g07370	6	32	0.287954	1.57123	2.44799	Up	2.77e-05	9.82e-05
LOC_Os05g12320	6	32	0.287954	1.57123	2.44799	Up	2.77e-05	9.82e-05
LOC_Os03g42540	6	32	0.287954	1.57123	2.44799	Up	2.77e-05	9.82e-05
LOC_Os10g09810	6	32	0.287954	1.57123	2.44799	Up	2.77e-05	9.82e-05
LOC_Os03g24500	6	32	0.287954	1.57123	2.44799	Up	2.77e-05	9.82e-05
LOC_Os11g32670	6	32	0.287954	1.57123	2.44799	Up	2.77e-05	9.82e-05
LOC_Os01g35980	6	32	0.287954	1.57123	2.44799	Up	2.77e-05	9.82e-05
LOC_Os06g14900	6	32	0.287954	1.57123	2.44799	Up	2.77e-05	9.82e-05
LOC_Os06g35790	6	32	0.287954	1.57123	2.44799	Up	2.77e-05	9.82e-05
LOC_Os07g17300	6	32	0.287954	1.57123	2.44799	Up	2.77e-05	9.82e-05
LOC_Os05g09716	6	32	0.287954	1.57123	2.44799	Up	2.77e-05	9.82e-05
LOC_Os12g30790	6	32	0.287954	1.57123	2.44799	Up	2.77e-05	9.82e-05
LOC_Os01g33120	6	32	0.287954	1.57123	2.44799	Up	2.77e-05	9.82e-05
LOC_Os05g18190	6	32	0.287954	1.57123	2.44799	Up	2.77e-05	9.82e-05
LOC_Os08g15980	6	32	0.287954	1.57123	2.44799	Up	2.77e-05	9.82e-05
LOC_Os10g07966	6	32	0.287954	1.57123	2.44799	Up	2.77e-05	9.82e-05
LOC_Os03g45130	6	32	0.287954	1.57123	2.44799	Up	2.77e-05	9.81e-05
LOC_Os04g06190	6	32	0.287954	1.57123	2.44799	Up	2.77e-05	9.81e-05
LOC_Os03g25900	6	32	0.287954	1.57123	2.44799	Up	2.77e-05	9.81e-05
LOC_Os11g32710	6	32	0.287954	1.57123	2.44799	Up	2.77e-05	9.81e-05
LOC_Os08g34200	6	32	0.287954	1.57123	2.44799	Up	2.77e-05	9.81e-05
LOC_Os06g40930	6	32	0.287954	1.57123	2.44799	Up	2.77e-05	9.81e-05
LOC_Os10g22760	6	32	0.287954	1.57123	2.44799	Up	2.77e-05	9.81e-05
LOC_Os02g35670	6	32	0.287954	1.57123	2.44799	Up	2.77e-05	9.81e-05
LOC_Os09g32070	6	32	0.287954	1.57123	2.44799	Up	2.77e-05	9.81e-05
LOC_Os12g39890	6	32	0.287954	1.57123	2.44799	Up	2.77e-05	9.81e-05
LOC_Os10g34064	6	32	0.287954	1.57123	2.44799	Up	2.77e-05	9.81e-05
LOC_Os06g11670	6	32	0.287954	1.57123	2.44799	Up	2.77e-05	9.81e-05
LOC_Os08g28070	6	32	0.287954	1.57123	2.44799	Up	2.77e-05	9.81e-05
LOC_Os10g17070	6	32	0.287954	1.57123	2.44799	Up	2.77e-05	9.81e-05
LOC_Os01g03930	9	48	0.43193	2.35685	2.44799	Up	3.29e-06	1.35e-05
LOC_Os08g44800	9	48	0.43193	2.35685	2.44799	Up	3.29e-06	1.35e-05
LOC_Os01g03400	10	53	0.479923	2.60235	2.43894	Up	1.82e-06	7.76e-06
LOC_Os12g34100	10	53	0.479923	2.60235	2.43894	Up	1.82e-06	7.76e-06
LOC_Os05g35030	7	37	0.335946	1.81674	2.43505	Up	1.22e-05	4.63e-05
LOC_Os12g02560	7	37	0.335946	1.81674	2.43505	Up	1.22e-05	4.63e-05
LOC_Os06g05770	7	37	0.335946	1.81674	2.43505	Up	1.22e-05	4.63e-05
LOC_Os09g10190	7	37	0.335946	1.81674	2.43505	Up	1.22e-05	4.63e-05
LOC_Os03g45734	7	37	0.335946	1.81674	2.43505	Up	1.22e-05	4.63e-05
LOC_Os01g45710	7	37	0.335946	1.81674	2.43505	Up	1.22e-05	4.63e-05
LOC_Os08g36460	7	37	0.335946	1.81674	2.43505	Up	1.22e-05	4.63e-05
LOC_Os03g49970	7	37	0.335946	1.81674	2.43505	Up	1.22e-05	4.63e-05
LOC_Os01g35780	7	37	0.335946	1.81674	2.43505	Up	1.22e-05	4.63e-05
LOC_Os05g34060	7	37	0.335946	1.81674	2.43505	Up	1.22e-05	4.63e-05
LOC_Os06g46530	7	37	0.335946	1.81674	2.43505	Up	1.22e-05	4.62e-05
LOC_Os05g31020	86	454	4.12734	22.2919	2.43323	Up	0	0
LOC_Os05g49940	29	153	1.39178	7.51245	2.43236	Up	1.42e-11	1.15e-10
LOC_Os03g20400	11	58	0.527915	2.84786	2.4315	Up	1e-06	4.42e-06
LOC_Os07g47050	8	42	0.383938	2.06224	2.42527	Up	6.19e-06	2.45e-05
LOC_Os09g31518	8	42	0.383938	2.06224	2.42527	Up	6.19e-06	2.45e-05
LOC_Os06g44790	8	42	0.383938	2.06224	2.42527	Up	6.19e-06	2.45e-05
LOC_Os05g01840	17	89	0.815869	4.36999	2.42122	Up	2.59e-08	1.38e-07
LOC_Os09g39800	9	47	0.43193	2.30775	2.41761	Up	3.33e-06	1.37e-05
LOC_Os10g42580	9	47	0.43193	2.30775	2.41761	Up	3.33e-06	1.37e-05
LOC_Os03g23110	9	47	0.43193	2.30775	2.41761	Up	3.33e-06	1.37e-05
LOC_Os09g08170	5	26	0.239961	1.27663	2.41146	Up	0.000116615	0.000351981
LOC_Os01g27670	5	26	0.239961	1.27663	2.41146	Up	0.000116615	0.000351961
LOC_Os07g24640	5	26	0.239961	1.27663	2.41146	Up	0.000116615	0.000351942
LOC_Os02g24970	5	26	0.239961	1.27663	2.41146	Up	0.000116615	0.000351922
LOC_Os12g33360	5	26	0.239961	1.27663	2.41146	Up	0.000116615	0.000351903
LOC_Os12g09400	5	26	0.239961	1.27663	2.41146	Up	0.000116615	0.000351883
LOC_Os03g63830	5	26	0.239961	1.27663	2.41146	Up	0.000116615	0.000351864
LOC_Os02g21670	5	26	0.239961	1.27663	2.41146	Up	0.000116615	0.000351844
LOC_Os07g12020	5	26	0.239961	1.27663	2.41146	Up	0.000116615	0.000351825
LOC_Os09g02950	5	26	0.239961	1.27663	2.41146	Up	0.000116615	0.000351805
LOC_Os05g17150	5	26	0.239961	1.27663	2.41146	Up	0.000116615	0.000351786
LOC_Os12g23310	5	26	0.239961	1.27663	2.41146	Up	0.000116615	0.000351766
LOC_Os09g04970	5	26	0.239961	1.27663	2.41146	Up	0.000116615	0.000351747
LOC_Os01g23120	5	26	0.239961	1.27663	2.41146	Up	0.000116615	0.000351727
LOC_Os08g19720	5	26	0.239961	1.27663	2.41146	Up	0.000116615	0.000351708
LOC_Os06g36580	5	26	0.239961	1.27663	2.41146	Up	0.000116615	0.000351688
LOC_Os11g10670	5	26	0.239961	1.27663	2.41146	Up	0.000116615	0.000351669
LOC_Os07g05310	5	26	0.239961	1.27663	2.41146	Up	0.000116615	0.000351649
LOC_Os12g26310	5	26	0.239961	1.27663	2.41146	Up	0.000116615	0.00035163
LOC_Os02g22720	5	26	0.239961	1.27663	2.41146	Up	0.000116615	0.00035161
LOC_Os06g16560	5	26	0.239961	1.27663	2.41146	Up	0.000116615	0.000351591
LOC_Os10g24880	5	26	0.239961	1.27663	2.41146	Up	0.000116615	0.000351571
LOC_Os08g27880	5	26	0.239961	1.27663	2.41146	Up	0.000116615	0.000351552
LOC_Os04g19290	5	26	0.239961	1.27663	2.41146	Up	0.000116615	0.000351532
LOC_Os12g31400	5	26	0.239961	1.27663	2.41146	Up	0.000116615	0.000351513
LOC_Os12g36540	5	26	0.239961	1.27663	2.41146	Up	0.000116615	0.000351493
LOC_Os12g20010	5	26	0.239961	1.27663	2.41146	Up	0.000116615	0.000351474
LOC_Os09g01950	5	26	0.239961	1.27663	2.41146	Up	0.000116615	0.000351454
LOC_Os06g02710	5	26	0.239961	1.27663	2.41146	Up	0.000116615	0.000351435
LOC_Os10g26750	5	26	0.239961	1.27663	2.41146	Up	0.000116615	0.000351415
LOC_Os07g12230	5	26	0.239961	1.27663	2.41146	Up	0.000116615	0.000351396
LOC_Os12g02780	5	26	0.239961	1.27663	2.41146	Up	0.000116615	0.000351376
LOC_Os07g42190	5	26	0.239961	1.27663	2.41146	Up	0.000116615	0.000351357
LOC_Os11g14690	5	26	0.239961	1.27663	2.41146	Up	0.000116615	0.000351337
LOC_Os10g02790	5	26	0.239961	1.27663	2.41146	Up	0.000116615	0.000351318
LOC_Os09g24430	5	26	0.239961	1.27663	2.41146	Up	0.000116615	0.000351299
LOC_Os10g14220	5	26	0.239961	1.27663	2.41146	Up	0.000116615	0.000351279
LOC_Os09g16150	5	26	0.239961	1.27663	2.41146	Up	0.000116615	0.00035126
LOC_Os02g33620	5	26	0.239961	1.27663	2.41146	Up	0.000116615	0.00035124
LOC_Os05g44850	5	26	0.239961	1.27663	2.41146	Up	0.000116615	0.000351221
LOC_Os05g15060	5	26	0.239961	1.27663	2.41146	Up	0.000116615	0.000351201
LOC_Os12g43165	5	26	0.239961	1.27663	2.41146	Up	0.000116615	0.000351182
LOC_Os07g48480	10	52	0.479923	2.55325	2.41146	Up	1.83e-06	7.79e-06
LOC_Os09g37090	10	52	0.479923	2.55325	2.41146	Up	1.83e-06	7.79e-06
LOC_Os05g12790	6	31	0.287954	1.52213	2.40218	Up	3.53e-05	0.000121602
LOC_Os07g19350	6	31	0.287954	1.52213	2.40218	Up	3.53e-05	0.000121594
LOC_Os03g10000	6	31	0.287954	1.52213	2.40218	Up	3.53e-05	0.000121587
LOC_Os02g22310	6	31	0.287954	1.52213	2.40218	Up	3.53e-05	0.000121579
LOC_Os01g27920	6	31	0.287954	1.52213	2.40218	Up	3.53e-05	0.000121571
LOC_Os03g30088	6	31	0.287954	1.52213	2.40218	Up	3.53e-05	0.000121564
LOC_Os11g24310	6	31	0.287954	1.52213	2.40218	Up	3.53e-05	0.000121556
LOC_Os08g17910	6	31	0.287954	1.52213	2.40218	Up	3.53e-05	0.000121548
LOC_Os03g31660	6	31	0.287954	1.52213	2.40218	Up	3.53e-05	0.000121541
LOC_Os06g29890	6	31	0.287954	1.52213	2.40218	Up	3.53e-05	0.000121533
LOC_Os06g44530	6	31	0.287954	1.52213	2.40218	Up	3.53e-05	0.000121525
LOC_Os10g25502	6	31	0.287954	1.52213	2.40218	Up	3.53e-05	0.000121517
LOC_Os05g39010	6	31	0.287954	1.52213	2.40218	Up	3.53e-05	0.00012151
LOC_Os05g09736	6	31	0.287954	1.52213	2.40218	Up	3.53e-05	0.000121502
LOC_Os03g33390	6	31	0.287954	1.52213	2.40218	Up	3.53e-05	0.000121494
LOC_Os08g05140	6	31	0.287954	1.52213	2.40218	Up	3.53e-05	0.000121487
LOC_Os12g15510	6	31	0.287954	1.52213	2.40218	Up	3.53e-05	0.000121479
LOC_Os06g36060	6	31	0.287954	1.52213	2.40218	Up	3.53e-05	0.000121471
LOC_Os02g26460	6	31	0.287954	1.52213	2.40218	Up	3.53e-05	0.000121464
LOC_Os01g39700	6	31	0.287954	1.52213	2.40218	Up	3.53e-05	0.000121456
LOC_Os01g57780	6	31	0.287954	1.52213	2.40218	Up	3.53e-05	0.000121448
LOC_Os02g17570	6	31	0.287954	1.52213	2.40218	Up	3.53e-05	0.000121441
LOC_Os06g25550	6	31	0.287954	1.52213	2.40218	Up	3.53e-05	0.000121433
LOC_Os08g33260	6	31	0.287954	1.52213	2.40218	Up	3.53e-05	0.000121425
LOC_Os11g31030	6	31	0.287954	1.52213	2.40218	Up	3.53e-05	0.000121417
LOC_Os02g28480	6	31	0.287954	1.52213	2.40218	Up	3.53e-05	0.00012141
LOC_Os01g29300	6	31	0.287954	1.52213	2.40218	Up	3.53e-05	0.000121402
LOC_Os11g22070	6	31	0.287954	1.52213	2.40218	Up	3.53e-05	0.000121394
LOC_Os12g25650	6	31	0.287954	1.52213	2.40218	Up	3.53e-05	0.000121387
LOC_Os06g34680	6	31	0.287954	1.52213	2.40218	Up	3.53e-05	0.000121379
LOC_Os04g16400	6	31	0.287954	1.52213	2.40218	Up	3.53e-05	0.000121371
LOC_Os03g36120	7	36	0.335946	1.76764	2.39552	Up	1.38e-05	5.17e-05
LOC_Os10g30900	7	36	0.335946	1.76764	2.39552	Up	1.38e-05	5.17e-05
LOC_Os03g04790	7	36	0.335946	1.76764	2.39552	Up	1.38e-05	5.17e-05
LOC_Os07g12120	7	36	0.335946	1.76764	2.39552	Up	1.38e-05	5.17e-05
LOC_Os12g41440	7	36	0.335946	1.76764	2.39552	Up	1.38e-05	5.17e-05
LOC_Os01g51240	7	36	0.335946	1.76764	2.39552	Up	1.38e-05	5.17e-05
LOC_Os02g20960	7	36	0.335946	1.76764	2.39552	Up	1.38e-05	5.17e-05
LOC_Os01g48520	7	36	0.335946	1.76764	2.39552	Up	1.38e-05	5.17e-05
LOC_Os12g34010	14	72	0.671892	3.53527	2.39552	Up	1.64e-07	7.92e-07
LOC_Os12g40000	7	36	0.335946	1.76764	2.39552	Up	1.38e-05	5.17e-05
LOC_Os08g05680	7	36	0.335946	1.76764	2.39552	Up	1.38e-05	5.17e-05
LOC_Os03g30190	7	36	0.335946	1.76764	2.39552	Up	1.38e-05	5.17e-05
LOC_Os01g45040	7	36	0.335946	1.76764	2.39552	Up	1.38e-05	5.17e-05
LOC_Os01g08620	7	36	0.335946	1.76764	2.39552	Up	1.38e-05	5.17e-05
LOC_Os06g30880	7	36	0.335946	1.76764	2.39552	Up	1.38e-05	5.17e-05
LOC_Os10g31490	7	36	0.335946	1.76764	2.39552	Up	1.38e-05	5.17e-05
LOC_Os01g32940	7	36	0.335946	1.76764	2.39552	Up	1.38e-05	5.17e-05
LOC_Os12g08840	7	36	0.335946	1.76764	2.39552	Up	1.38e-05	5.17e-05
LOC_Os03g40220	7	36	0.335946	1.76764	2.39552	Up	1.38e-05	5.16e-05
LOC_Os01g40030	7	36	0.335946	1.76764	2.39552	Up	1.38e-05	5.16e-05
LOC_Os02g52890	7	36	0.335946	1.76764	2.39552	Up	1.38e-05	5.16e-05
LOC_Os07g04390	7	36	0.335946	1.76764	2.39552	Up	1.38e-05	5.16e-05
LOC_Os04g09370	7	36	0.335946	1.76764	2.39552	Up	1.38e-05	5.16e-05
LOC_Os02g47340	8	41	0.383938	2.01314	2.3905	Up	6.52e-06	2.57e-05
LOC_Os06g13510	8	41	0.383938	2.01314	2.3905	Up	6.52e-06	2.57e-05
LOC_Os10g30800	8	41	0.383938	2.01314	2.3905	Up	6.52e-06	2.57e-05
LOC_Os03g55014	8	41	0.383938	2.01314	2.3905	Up	6.52e-06	2.57e-05
LOC_Os06g46630	8	41	0.383938	2.01314	2.3905	Up	6.52e-06	2.57e-05
LOC_Os12g33320	8	41	0.383938	2.01314	2.3905	Up	6.52e-06	2.57e-05
LOC_Os05g15780	8	41	0.383938	2.01314	2.3905	Up	6.52e-06	2.57e-05
LOC_Os04g33250	9	46	0.43193	2.25865	2.38659	Up	3.4e-06	1.39e-05
LOC_Os07g45340	9	46	0.43193	2.25865	2.38659	Up	3.4e-06	1.39e-05
LOC_Os10g40400	9	46	0.43193	2.25865	2.38659	Up	3.4e-06	1.39e-05
LOC_Os08g39250	10	51	0.479923	2.50415	2.38345	Up	1.84e-06	7.84e-06
LOC_Os09g14770	5	25	0.239961	1.22752	2.35488	Up	0.000179449	0.00051582
LOC_Os01g51000	5	25	0.239961	1.22752	2.35488	Up	0.000179449	0.000515793
LOC_Os06g45740	5	25	0.239961	1.22752	2.35488	Up	0.000179449	0.000515765
LOC_Os06g33660	5	25	0.239961	1.22752	2.35488	Up	0.000179449	0.000515738
LOC_Os02g21840	5	25	0.239961	1.22752	2.35488	Up	0.000179449	0.000515711
LOC_Os12g24640	5	25	0.239961	1.22752	2.35488	Up	0.000179449	0.000515684
LOC_Os03g44910	5	25	0.239961	1.22752	2.35488	Up	0.000179449	0.000515656
LOC_Os07g23140	5	25	0.239961	1.22752	2.35488	Up	0.000179449	0.000515629
LOC_Os09g09820	5	25	0.239961	1.22752	2.35488	Up	0.000179449	0.000515602
LOC_Os08g23654	5	25	0.239961	1.22752	2.35488	Up	0.000179449	0.000515575
LOC_Os11g26970	5	25	0.239961	1.22752	2.35488	Up	0.000179449	0.000515547
LOC_Os11g12590	5	25	0.239961	1.22752	2.35488	Up	0.000179449	0.00051552
LOC_Os05g20840	5	25	0.239961	1.22752	2.35488	Up	0.000179449	0.000515493
LOC_Os08g02660	5	25	0.239961	1.22752	2.35488	Up	0.000179449	0.000515466
LOC_Os11g17710	5	25	0.239961	1.22752	2.35488	Up	0.000179449	0.000515439
LOC_Os07g04780	5	25	0.239961	1.22752	2.35488	Up	0.000179449	0.000515411
LOC_Os12g33000	5	25	0.239961	1.22752	2.35488	Up	0.000179449	0.000515384
LOC_Os10g33020	5	25	0.239961	1.22752	2.35488	Up	0.000179449	0.000515357
LOC_Os07g28020	5	25	0.239961	1.22752	2.35488	Up	0.000179449	0.00051533
LOC_Os03g32070	5	25	0.239961	1.22752	2.35488	Up	0.000179449	0.000515303
LOC_Os12g27690	5	25	0.239961	1.22752	2.35488	Up	0.000179449	0.000515275
LOC_Os04g24090	5	25	0.239961	1.22752	2.35488	Up	0.000179449	0.000515248
LOC_Os06g15890	5	25	0.239961	1.22752	2.35488	Up	0.000179449	0.000515221
LOC_Os02g19420	5	25	0.239961	1.22752	2.35488	Up	0.000179449	0.000515194
LOC_Os05g42260	5	25	0.239961	1.22752	2.35488	Up	0.000179449	0.000515167
LOC_Os11g14790	5	25	0.239961	1.22752	2.35488	Up	0.000179449	0.000515139
LOC_Os09g11730	5	25	0.239961	1.22752	2.35488	Up	0.000179449	0.000515112
LOC_Os04g29280	5	25	0.239961	1.22752	2.35488	Up	0.000179449	0.000515085
LOC_Os06g30120	5	25	0.239961	1.22752	2.35488	Up	0.000179449	0.000515058
LOC_Os01g54260	5	25	0.239961	1.22752	2.35488	Up	0.000179449	0.000515031
LOC_Os12g35690	5	25	0.239961	1.22752	2.35488	Up	0.000179449	0.000515003
LOC_Os05g46680	5	25	0.239961	1.22752	2.35488	Up	0.000179449	0.000514976
LOC_Os11g13660	5	25	0.239961	1.22752	2.35488	Up	0.000179449	0.000514949
LOC_Os09g04400	5	25	0.239961	1.22752	2.35488	Up	0.000179449	0.000514922
LOC_Os09g14120	5	25	0.239961	1.22752	2.35488	Up	0.000179449	0.000514895
LOC_Os04g07510	5	25	0.239961	1.22752	2.35488	Up	0.000179449	0.000514868
LOC_Os03g43190	5	25	0.239961	1.22752	2.35488	Up	0.000179449	0.000514841
LOC_Os01g19580	5	25	0.239961	1.22752	2.35488	Up	0.000179449	0.000514813
LOC_Os01g17970	5	25	0.239961	1.22752	2.35488	Up	0.000179449	0.000514786
LOC_Os06g25439	5	25	0.239961	1.22752	2.35488	Up	0.000179449	0.000514759
LOC_Os02g25350	5	25	0.239961	1.22752	2.35488	Up	0.000179449	0.000514732
LOC_Os10g10530	5	25	0.239961	1.22752	2.35488	Up	0.000179449	0.000514705
LOC_Os02g25690	7	35	0.335946	1.71853	2.35488	Up	1.64e-05	6.09e-05
LOC_Os11g10350	7	35	0.335946	1.71853	2.35488	Up	1.64e-05	6.09e-05
LOC_Os09g37110	7	35	0.335946	1.71853	2.35488	Up	1.64e-05	6.09e-05
LOC_Os02g55860	7	35	0.335946	1.71853	2.35488	Up	1.64e-05	6.09e-05
LOC_Os01g23660	7	35	0.335946	1.71853	2.35488	Up	1.64e-05	6.09e-05
LOC_Os09g14060	7	35	0.335946	1.71853	2.35488	Up	1.64e-05	6.09e-05
LOC_Os08g32240	7	35	0.335946	1.71853	2.35488	Up	1.64e-05	6.08e-05
LOC_Os04g08500	7	35	0.335946	1.71853	2.35488	Up	1.64e-05	6.08e-05
LOC_Os08g20470	7	35	0.335946	1.71853	2.35488	Up	1.64e-05	6.08e-05
LOC_Os08g35400	7	35	0.335946	1.71853	2.35488	Up	1.64e-05	6.08e-05
LOC_Os03g56682	7	35	0.335946	1.71853	2.35488	Up	1.64e-05	6.08e-05
LOC_Os03g59810	7	35	0.335946	1.71853	2.35488	Up	1.64e-05	6.08e-05
LOC_Os11g10080	7	35	0.335946	1.71853	2.35488	Up	1.64e-05	6.08e-05
LOC_Os12g42460	7	35	0.335946	1.71853	2.35488	Up	1.64e-05	6.08e-05
LOC_Os10g05170	7	35	0.335946	1.71853	2.35488	Up	1.64e-05	6.08e-05
LOC_Os02g18730	7	35	0.335946	1.71853	2.35488	Up	1.64e-05	6.08e-05
LOC_Os05g32490	7	35	0.335946	1.71853	2.35488	Up	1.64e-05	6.08e-05
LOC_Os05g40140	7	35	0.335946	1.71853	2.35488	Up	1.64e-05	6.08e-05
LOC_Os03g52100	7	35	0.335946	1.71853	2.35488	Up	1.64e-05	6.08e-05
LOC_Os09g11950	7	35	0.335946	1.71853	2.35488	Up	1.64e-05	6.08e-05
LOC_Os04g01760	7	35	0.335946	1.71853	2.35488	Up	1.64e-05	6.08e-05
LOC_Os09g27630	7	35	0.335946	1.71853	2.35488	Up	1.64e-05	6.08e-05
LOC_Os04g18559	7	35	0.335946	1.71853	2.35488	Up	1.64e-05	6.08e-05
LOC_Os03g61190	7	35	0.335946	1.71853	2.35488	Up	1.64e-05	6.08e-05
LOC_Os02g44620	9	45	0.43193	2.20954	2.35488	Up	3.52e-06	1.44e-05
LOC_Os09g17720	9	45	0.43193	2.20954	2.35488	Up	3.52e-06	1.44e-05
LOC_Os02g25260	9	45	0.43193	2.20954	2.35488	Up	3.52e-06	1.44e-05
LOC_Os09g35650	6	30	0.287954	1.47303	2.35488	Up	4.81e-05	0.000161225
LOC_Os02g15070	6	30	0.287954	1.47303	2.35488	Up	4.81e-05	0.000161215
LOC_Os02g07020	6	30	0.287954	1.47303	2.35488	Up	4.81e-05	0.000161205
LOC_Os10g16580	6	30	0.287954	1.47303	2.35488	Up	4.81e-05	0.000161195
LOC_Os02g27670	6	30	0.287954	1.47303	2.35488	Up	4.81e-05	0.000161185
LOC_Os05g24990	6	30	0.287954	1.47303	2.35488	Up	4.81e-05	0.000161175
LOC_Os10g18940	6	30	0.287954	1.47303	2.35488	Up	4.81e-05	0.000161165
LOC_Os04g18160	6	30	0.287954	1.47303	2.35488	Up	4.81e-05	0.000161155
LOC_Os04g07790	6	30	0.287954	1.47303	2.35488	Up	4.81e-05	0.000161145
LOC_Os02g29820	6	30	0.287954	1.47303	2.35488	Up	4.81e-05	0.000161136
LOC_Os05g09680	6	30	0.287954	1.47303	2.35488	Up	4.81e-05	0.000161126
LOC_Os06g42160	6	30	0.287954	1.47303	2.35488	Up	4.81e-05	0.000161116
LOC_Os12g29440	6	30	0.287954	1.47303	2.35488	Up	4.81e-05	0.000161106
LOC_Os05g08250	6	30	0.287954	1.47303	2.35488	Up	4.81e-05	0.000161096
LOC_Os12g39260	6	30	0.287954	1.47303	2.35488	Up	4.81e-05	0.000161086
LOC_Os07g22920	6	30	0.287954	1.47303	2.35488	Up	4.81e-05	0.000161076
LOC_Os03g13120	6	30	0.287954	1.47303	2.35488	Up	4.81e-05	0.000161066
LOC_Os03g39510	6	30	0.287954	1.47303	2.35488	Up	4.81e-05	0.000161056
LOC_Os03g31060	6	30	0.287954	1.47303	2.35488	Up	4.81e-05	0.000161046
LOC_Os01g33520	6	30	0.287954	1.47303	2.35488	Up	4.81e-05	0.000161036
LOC_Os06g13920	6	30	0.287954	1.47303	2.35488	Up	4.81e-05	0.000161026
LOC_Os12g37090	6	30	0.287954	1.47303	2.35488	Up	4.81e-05	0.000161017
LOC_Os09g22180	6	30	0.287954	1.47303	2.35488	Up	4.81e-05	0.000161007
LOC_Os02g29050	6	30	0.287954	1.47303	2.35488	Up	4.81e-05	0.000160997
LOC_Os05g24980	6	30	0.287954	1.47303	2.35488	Up	4.81e-05	0.000160987
LOC_Os05g04560	6	30	0.287954	1.47303	2.35488	Up	4.81e-05	0.000160977
LOC_Os07g15030	6	30	0.287954	1.47303	2.35488	Up	4.81e-05	0.000160967
LOC_Os06g30530	6	30	0.287954	1.47303	2.35488	Up	4.81e-05	0.000160957
LOC_Os12g39060	6	30	0.287954	1.47303	2.35488	Up	4.81e-05	0.000160947
LOC_Os09g12640	6	30	0.287954	1.47303	2.35488	Up	4.81e-05	0.000160937
LOC_Os11g34710	6	30	0.287954	1.47303	2.35488	Up	4.81e-05	0.000160927
LOC_Os08g23510	6	30	0.287954	1.47303	2.35488	Up	4.81e-05	0.000160918
LOC_Os10g15260	6	30	0.287954	1.47303	2.35488	Up	4.81e-05	0.000160908
LOC_Os03g35580	6	30	0.287954	1.47303	2.35488	Up	4.81e-05	0.000160898
LOC_Os07g15590	6	30	0.287954	1.47303	2.35488	Up	4.81e-05	0.000160888
LOC_Os01g36100	6	30	0.287954	1.47303	2.35488	Up	4.81e-05	0.000160878
LOC_Os07g12070	6	30	0.287954	1.47303	2.35488	Up	4.81e-05	0.000160868
LOC_Os07g12880	6	30	0.287954	1.47303	2.35488	Up	4.81e-05	0.000160858
LOC_Os05g24420	6	30	0.287954	1.47303	2.35488	Up	4.81e-05	0.000160848
LOC_Os11g02870	6	30	0.287954	1.47303	2.35488	Up	4.81e-05	0.000160838
LOC_Os08g18990	6	30	0.287954	1.47303	2.35488	Up	4.81e-05	0.000160828
LOC_Os12g17440	6	30	0.287954	1.47303	2.35488	Up	4.81e-05	0.000160819
LOC_Os08g15505	6	30	0.287954	1.47303	2.35488	Up	4.81e-05	0.000160809
LOC_Os05g27420	6	30	0.287954	1.47303	2.35488	Up	4.81e-05	0.000160799
LOC_Os05g08150	6	30	0.287954	1.47303	2.35488	Up	4.81e-05	0.000160789
LOC_Os12g14090	6	30	0.287954	1.47303	2.35488	Up	4.81e-05	0.000160779
LOC_Os01g43600	8	40	0.383938	1.96404	2.35488	Up	7.07e-06	2.78e-05
LOC_Os10g34704	8	40	0.383938	1.96404	2.35488	Up	7.07e-06	2.78e-05
LOC_Os05g06230	8	40	0.383938	1.96404	2.35488	Up	7.07e-06	2.78e-05
LOC_Os08g09960	8	40	0.383938	1.96404	2.35488	Up	7.07e-06	2.78e-05
LOC_Os03g10380	8	40	0.383938	1.96404	2.35488	Up	7.07e-06	2.78e-05
LOC_Os02g36770	10	50	0.479923	2.45505	2.35488	Up	1.87e-06	7.94e-06
LOC_Os11g37950	10	50	0.479923	2.45505	2.35488	Up	1.87e-06	7.94e-06
LOC_Os02g54880	12	59	0.575907	2.89696	2.33063	Up	5.56e-07	2.52e-06
LOC_Os03g06690	12	59	0.575907	2.89696	2.33063	Up	5.56e-07	2.52e-06
LOC_Os01g21240	11	54	0.527915	2.65145	2.32841	Up	1.02e-06	4.5e-06
LOC_Os07g47940	10	49	0.479923	2.40595	2.32573	Up	1.91e-06	8.1e-06
LOC_Os03g49810	10	49	0.479923	2.40595	2.32573	Up	1.91e-06	8.1e-06
LOC_Os03g17790	90	441	4.3193	21.6535	2.32573	Up	0	0
LOC_Os06g46080	9	44	0.43193	2.16044	2.32246	Up	3.71e-06	1.52e-05
LOC_Os07g25330	9	44	0.43193	2.16044	2.32246	Up	3.71e-06	1.52e-05
LOC_Os04g58650	9	44	0.43193	2.16044	2.32246	Up	3.71e-06	1.52e-05
LOC_Os06g51550	9	44	0.43193	2.16044	2.32246	Up	3.71e-06	1.52e-05
LOC_Os11g03040	9	44	0.43193	2.16044	2.32246	Up	3.71e-06	1.52e-05
LOC_Os06g17940	9	44	0.43193	2.16044	2.32246	Up	3.71e-06	1.52e-05
LOC_Os02g33360	8	39	0.383938	1.91494	2.31835	Up	8.01e-06	3.12e-05
LOC_Os02g42100	8	39	0.383938	1.91494	2.31835	Up	8.01e-06	3.12e-05
LOC_Os02g48440	8	39	0.383938	1.91494	2.31835	Up	8.01e-06	3.12e-05
LOC_Os05g20280	8	39	0.383938	1.91494	2.31835	Up	8.01e-06	3.12e-05
LOC_Os10g22300	8	39	0.383938	1.91494	2.31835	Up	8.01e-06	3.12e-05
LOC_Os10g23240	8	39	0.383938	1.91494	2.31835	Up	8.01e-06	3.12e-05
LOC_Os07g14000	7	34	0.335946	1.66943	2.31306	Up	2.09e-05	7.58e-05
LOC_Os11g25400	7	34	0.335946	1.66943	2.31306	Up	2.09e-05	7.58e-05
LOC_Os08g29040	7	34	0.335946	1.66943	2.31306	Up	2.09e-05	7.58e-05
LOC_Os08g34180	7	34	0.335946	1.66943	2.31306	Up	2.09e-05	7.58e-05
LOC_Os11g06470	7	34	0.335946	1.66943	2.31306	Up	2.09e-05	7.58e-05
LOC_Os03g05410	7	34	0.335946	1.66943	2.31306	Up	2.09e-05	7.58e-05
LOC_Os03g28260	7	34	0.335946	1.66943	2.31306	Up	2.09e-05	7.58e-05
LOC_Os05g31600	7	34	0.335946	1.66943	2.31306	Up	2.09e-05	7.58e-05
LOC_Os08g11160	7	34	0.335946	1.66943	2.31306	Up	2.09e-05	7.58e-05
LOC_Os08g13530	7	34	0.335946	1.66943	2.31306	Up	2.09e-05	7.58e-05
LOC_Os04g39330	7	34	0.335946	1.66943	2.31306	Up	2.09e-05	7.58e-05
LOC_Os11g35810	7	34	0.335946	1.66943	2.31306	Up	2.09e-05	7.58e-05
LOC_Os12g34108	7	34	0.335946	1.66943	2.31306	Up	2.09e-05	7.57e-05
LOC_Os01g24460	7	34	0.335946	1.66943	2.31306	Up	2.09e-05	7.57e-05
LOC_Os03g46240	7	34	0.335946	1.66943	2.31306	Up	2.09e-05	7.57e-05
LOC_Os12g03230	7	34	0.335946	1.66943	2.31306	Up	2.09e-05	7.57e-05
LOC_Os10g24820	7	34	0.335946	1.66943	2.31306	Up	2.09e-05	7.57e-05
LOC_Os12g19790	7	34	0.335946	1.66943	2.31306	Up	2.09e-05	7.57e-05
LOC_Os01g67620	7	34	0.335946	1.66943	2.31306	Up	2.09e-05	7.57e-05
LOC_Os01g17090	7	34	0.335946	1.66943	2.31306	Up	2.09e-05	7.57e-05
LOC_Os02g54410	7	34	0.335946	1.66943	2.31306	Up	2.09e-05	7.57e-05
LOC_Os04g27660	7	34	0.335946	1.66943	2.31306	Up	2.09e-05	7.57e-05
LOC_Os11g45220	6	29	0.287954	1.42393	2.30597	Up	6.98e-05	0.000223906
LOC_Os10g22250	6	29	0.287954	1.42393	2.30597	Up	6.98e-05	0.000223893
LOC_Os01g24870	6	29	0.287954	1.42393	2.30597	Up	6.98e-05	0.000223879
LOC_Os06g30600	6	29	0.287954	1.42393	2.30597	Up	6.98e-05	0.000223866
LOC_Os01g66800	6	29	0.287954	1.42393	2.30597	Up	6.98e-05	0.000223853
LOC_Os06g39580	6	29	0.287954	1.42393	2.30597	Up	6.98e-05	0.00022384
LOC_Os03g40870	6	29	0.287954	1.42393	2.30597	Up	6.98e-05	0.000223827
LOC_Os08g27450	6	29	0.287954	1.42393	2.30597	Up	6.98e-05	0.000223813
LOC_Os02g31860	6	29	0.287954	1.42393	2.30597	Up	6.98e-05	0.0002238
LOC_Os06g23400	6	29	0.287954	1.42393	2.30597	Up	6.98e-05	0.000223787
LOC_Os10g21640	6	29	0.287954	1.42393	2.30597	Up	6.98e-05	0.000223774
LOC_Os03g52080	6	29	0.287954	1.42393	2.30597	Up	6.98e-05	0.000223761
LOC_Os01g33510	6	29	0.287954	1.42393	2.30597	Up	6.98e-05	0.000223748
LOC_Os03g28020	6	29	0.287954	1.42393	2.30597	Up	6.98e-05	0.000223734
LOC_Os06g38050	6	29	0.287954	1.42393	2.30597	Up	6.98e-05	0.000223721
LOC_Os09g22030	6	29	0.287954	1.42393	2.30597	Up	6.98e-05	0.000223708
LOC_Os12g20460	6	29	0.287954	1.42393	2.30597	Up	6.98e-05	0.000223695
LOC_Os11g14530	6	29	0.287954	1.42393	2.30597	Up	6.98e-05	0.000223682
LOC_Os01g21200	6	29	0.287954	1.42393	2.30597	Up	6.98e-05	0.000223669
LOC_Os08g28250	6	29	0.287954	1.42393	2.30597	Up	6.98e-05	0.000223655
LOC_Os11g28500	6	29	0.287954	1.42393	2.30597	Up	6.98e-05	0.000223642
LOC_Os10g41910	6	29	0.287954	1.42393	2.30597	Up	6.98e-05	0.000223629
LOC_Os03g42740	6	29	0.287954	1.42393	2.30597	Up	6.98e-05	0.000223616
LOC_Os07g17060	6	29	0.287954	1.42393	2.30597	Up	6.98e-05	0.000223603
LOC_Os09g29440	6	29	0.287954	1.42393	2.30597	Up	6.98e-05	0.00022359
LOC_Os05g07830	6	29	0.287954	1.42393	2.30597	Up	6.98e-05	0.000223576
LOC_Os07g17090	6	29	0.287954	1.42393	2.30597	Up	6.98e-05	0.000223563
LOC_Os08g22770	6	29	0.287954	1.42393	2.30597	Up	6.98e-05	0.00022355
LOC_Os04g38460	6	29	0.287954	1.42393	2.30597	Up	6.98e-05	0.000223537
LOC_Os01g64330	6	29	0.287954	1.42393	2.30597	Up	6.98e-05	0.000223524
LOC_Os08g26875	6	29	0.287954	1.42393	2.30597	Up	6.98e-05	0.000223511
LOC_Os03g30010	6	29	0.287954	1.42393	2.30597	Up	6.98e-05	0.000223497
LOC_Os05g29110	6	29	0.287954	1.42393	2.30597	Up	6.98e-05	0.000223484
LOC_Os01g38420	6	29	0.287954	1.42393	2.30597	Up	6.98e-05	0.000223471
LOC_Os11g15120	6	29	0.287954	1.42393	2.30597	Up	6.98e-05	0.000223458
LOC_Os07g24330	6	29	0.287954	1.42393	2.30597	Up	6.98e-05	0.000223445
LOC_Os03g45590	6	29	0.287954	1.42393	2.30597	Up	6.98e-05	0.000223432
LOC_Os10g01460	6	29	0.287954	1.42393	2.30597	Up	6.98e-05	0.000223419
LOC_Os12g18510	6	29	0.287954	1.42393	2.30597	Up	6.98e-05	0.000223406
LOC_Os03g53430	6	29	0.287954	1.42393	2.30597	Up	6.98e-05	0.000223392
LOC_Os08g30710	6	29	0.287954	1.42393	2.30597	Up	6.98e-05	0.000223379
LOC_Os05g35700	6	29	0.287954	1.42393	2.30597	Up	6.98e-05	0.000223366
LOC_Os02g42920	6	29	0.287954	1.42393	2.30597	Up	6.98e-05	0.000223353
LOC_Os12g35830	6	29	0.287954	1.42393	2.30597	Up	6.98e-05	0.00022334
LOC_Os03g33900	6	29	0.287954	1.42393	2.30597	Up	6.98e-05	0.000223327
LOC_Os11g27740	6	29	0.287954	1.42393	2.30597	Up	6.98e-05	0.000223314
LOC_Os07g20600	6	29	0.287954	1.42393	2.30597	Up	6.98e-05	0.0002233
LOC_Os01g24130	6	29	0.287954	1.42393	2.30597	Up	6.98e-05	0.000223287
LOC_Os09g16660	6	29	0.287954	1.42393	2.30597	Up	6.98e-05	0.000223274
LOC_Os12g21910	6	29	0.287954	1.42393	2.30597	Up	6.98e-05	0.000223261
LOC_Os09g38170	6	29	0.287954	1.42393	2.30597	Up	6.98e-05	0.000223248
LOC_Os05g23580	5	24	0.239961	1.17842	2.29598	Up	0.000286066	0.000784087
LOC_Os08g23270	5	24	0.239961	1.17842	2.29598	Up	0.000286066	0.000784048
LOC_Os08g15380	5	24	0.239961	1.17842	2.29598	Up	0.000286066	0.000784008
LOC_Os12g37050	5	24	0.239961	1.17842	2.29598	Up	0.000286066	0.000783969
LOC_Os12g23210	5	24	0.239961	1.17842	2.29598	Up	0.000286066	0.000783929
LOC_Os02g28420	5	24	0.239961	1.17842	2.29598	Up	0.000286066	0.00078389
LOC_Os09g13280	5	24	0.239961	1.17842	2.29598	Up	0.000286066	0.00078385
LOC_Os07g15050	5	24	0.239961	1.17842	2.29598	Up	0.000286066	0.000783811
LOC_Os07g22990	5	24	0.239961	1.17842	2.29598	Up	0.000286066	0.000783771
LOC_Os01g32020	5	24	0.239961	1.17842	2.29598	Up	0.000286066	0.000783732
LOC_Os11g23190	5	24	0.239961	1.17842	2.29598	Up	0.000286066	0.000783692
LOC_Os12g20140	5	24	0.239961	1.17842	2.29598	Up	0.000286066	0.000783653
LOC_Os09g19630	5	24	0.239961	1.17842	2.29598	Up	0.000286066	0.000783613
LOC_Os11g14640	5	24	0.239961	1.17842	2.29598	Up	0.000286066	0.000783574
LOC_Os01g28882	5	24	0.239961	1.17842	2.29598	Up	0.000286066	0.000783535
LOC_Os12g20470	5	24	0.239961	1.17842	2.29598	Up	0.000286066	0.000783495
LOC_Os11g19310	5	24	0.239961	1.17842	2.29598	Up	0.000286066	0.000783456
LOC_Os03g33970	5	24	0.239961	1.17842	2.29598	Up	0.000286066	0.000783416
LOC_Os06g28610	5	24	0.239961	1.17842	2.29598	Up	0.000286066	0.000783377
LOC_Os06g09500	5	24	0.239961	1.17842	2.29598	Up	0.000286066	0.000783337
LOC_Os02g34620	5	24	0.239961	1.17842	2.29598	Up	0.000286066	0.000783298
LOC_Os08g25970	5	24	0.239961	1.17842	2.29598	Up	0.000286066	0.000783258
LOC_Os08g11190	5	24	0.239961	1.17842	2.29598	Up	0.000286066	0.000783219
LOC_Os09g18240	5	24	0.239961	1.17842	2.29598	Up	0.000286066	0.00078318
LOC_Os05g20730	5	24	0.239961	1.17842	2.29598	Up	0.000286066	0.00078314
LOC_Os01g68990	5	24	0.239961	1.17842	2.29598	Up	0.000286066	0.000783101
LOC_Os03g26890	5	24	0.239961	1.17842	2.29598	Up	0.000286066	0.000783061
LOC_Os11g17230	5	24	0.239961	1.17842	2.29598	Up	0.000286066	0.000783022
LOC_Os12g14850	5	24	0.239961	1.17842	2.29598	Up	0.000286066	0.000782983
LOC_Os03g40800	5	24	0.239961	1.17842	2.29598	Up	0.000286066	0.000782943
LOC_Os12g08380	5	24	0.239961	1.17842	2.29598	Up	0.000286066	0.000782904
LOC_Os10g11910	5	24	0.239961	1.17842	2.29598	Up	0.000286066	0.000782864
LOC_Os11g14360	5	24	0.239961	1.17842	2.29598	Up	0.000286066	0.000782825
LOC_Os11g14770	5	24	0.239961	1.17842	2.29598	Up	0.000286066	0.000782786
LOC_Os02g25670	5	24	0.239961	1.17842	2.29598	Up	0.000286066	0.000782746
LOC_Os12g33510	5	24	0.239961	1.17842	2.29598	Up	0.000286066	0.000782707
LOC_Os09g19680	5	24	0.239961	1.17842	2.29598	Up	0.000286066	0.000782668
LOC_Os08g27700	5	24	0.239961	1.17842	2.29598	Up	0.000286066	0.000782628
LOC_Os12g17710	5	24	0.239961	1.17842	2.29598	Up	0.000286066	0.000782589
LOC_Os11g35290	5	24	0.239961	1.17842	2.29598	Up	0.000286066	0.00078255
LOC_Os12g10430	5	24	0.239961	1.17842	2.29598	Up	0.000286066	0.00078251
LOC_Os02g32960	5	24	0.239961	1.17842	2.29598	Up	0.000286066	0.000782471
LOC_Os12g34680	5	24	0.239961	1.17842	2.29598	Up	0.000286066	0.000782431
LOC_Os07g15950	5	24	0.239961	1.17842	2.29598	Up	0.000286066	0.000782392
LOC_Os07g29540	5	24	0.239961	1.17842	2.29598	Up	0.000286066	0.000782353
LOC_Os02g26880	5	24	0.239961	1.17842	2.29598	Up	0.000286066	0.000782314
LOC_Os01g07010	5	24	0.239961	1.17842	2.29598	Up	0.000286066	0.000782274
LOC_Os03g33700	5	24	0.239961	1.17842	2.29598	Up	0.000286066	0.000782235
LOC_Os08g08930	5	24	0.239961	1.17842	2.29598	Up	0.000286066	0.000782196
LOC_Os05g35940	10	48	0.479923	2.35685	2.29598	Up	1.98e-06	8.38e-06
LOC_Os01g41834	10	48	0.479923	2.35685	2.29598	Up	1.98e-06	8.38e-06
LOC_Os09g37530	14	67	0.671892	3.28977	2.29168	Up	1.65e-07	7.94e-07
LOC_Os06g12810	9	43	0.43193	2.11134	2.28929	Up	4.05e-06	1.64e-05
LOC_Os02g33530	9	43	0.43193	2.11134	2.28929	Up	4.05e-06	1.64e-05
LOC_Os05g35900	8	38	0.383938	1.86584	2.28088	Up	9.59e-06	3.7e-05
LOC_Os02g02210	8	38	0.383938	1.86584	2.28088	Up	9.59e-06	3.7e-05
LOC_Os12g04840	8	38	0.383938	1.86584	2.28088	Up	9.59e-06	3.7e-05
LOC_Os06g13420	8	38	0.383938	1.86584	2.28088	Up	9.59e-06	3.7e-05
LOC_Os02g28700	8	38	0.383938	1.86584	2.28088	Up	9.59e-06	3.7e-05
LOC_Os01g21790	8	38	0.383938	1.86584	2.28088	Up	9.59e-06	3.7e-05
LOC_Os03g43040	8	38	0.383938	1.86584	2.28088	Up	9.59e-06	3.7e-05
LOC_Os05g38870	8	38	0.383938	1.86584	2.28088	Up	9.59e-06	3.7e-05
LOC_Os08g29310	8	38	0.383938	1.86584	2.28088	Up	9.59e-06	3.7e-05
LOC_Os10g29250	8	38	0.383938	1.86584	2.28088	Up	9.59e-06	3.69e-05
LOC_Os03g52258	8	38	0.383938	1.86584	2.28088	Up	9.59e-06	3.69e-05
LOC_Os11g20520	8	38	0.383938	1.86584	2.28088	Up	9.59e-06	3.69e-05
LOC_Os12g21670	8	38	0.383938	1.86584	2.28088	Up	9.59e-06	3.69e-05
LOC_Os02g06510	11	52	0.527915	2.55325	2.27396	Up	1.06e-06	4.66e-06
LOC_Os06g38140	7	33	0.335946	1.62033	2.26999	Up	2.85e-05	0.000100621
LOC_Os12g08450	7	33	0.335946	1.62033	2.26999	Up	2.85e-05	0.000100614
LOC_Os06g37500	7	33	0.335946	1.62033	2.26999	Up	2.85e-05	0.000100608
LOC_Os05g08070	7	33	0.335946	1.62033	2.26999	Up	2.85e-05	0.000100601
LOC_Os12g19480	7	33	0.335946	1.62033	2.26999	Up	2.85e-05	0.000100594
LOC_Os06g43500	7	33	0.335946	1.62033	2.26999	Up	2.85e-05	0.000100588
LOC_Os03g41140	7	33	0.335946	1.62033	2.26999	Up	2.85e-05	0.000100581
LOC_Os05g30120	7	33	0.335946	1.62033	2.26999	Up	2.85e-05	0.000100575
LOC_Os06g29240	7	33	0.335946	1.62033	2.26999	Up	2.85e-05	0.000100568
LOC_Os06g37470	7	33	0.335946	1.62033	2.26999	Up	2.85e-05	0.000100562
LOC_Os04g18520	7	33	0.335946	1.62033	2.26999	Up	2.85e-05	0.000100555
LOC_Os07g07730	7	33	0.335946	1.62033	2.26999	Up	2.85e-05	0.000100549
LOC_Os05g02435	7	33	0.335946	1.62033	2.26999	Up	2.85e-05	0.000100542
LOC_Os04g07400	7	33	0.335946	1.62033	2.26999	Up	2.85e-05	0.000100536
LOC_Os03g24780	7	33	0.335946	1.62033	2.26999	Up	2.85e-05	0.000100529
LOC_Os05g40340	7	33	0.335946	1.62033	2.26999	Up	2.85e-05	0.000100523
LOC_Os02g47710	7	33	0.335946	1.62033	2.26999	Up	2.85e-05	0.000100516
LOC_Os02g13880	7	33	0.335946	1.62033	2.26999	Up	2.85e-05	0.00010051
LOC_Os10g03790	7	33	0.335946	1.62033	2.26999	Up	2.85e-05	0.000100503
LOC_Os11g06570	7	33	0.335946	1.62033	2.26999	Up	2.85e-05	0.000100497
LOC_Os12g16630	7	33	0.335946	1.62033	2.26999	Up	2.85e-05	0.00010049
LOC_Os04g34060	7	33	0.335946	1.62033	2.26999	Up	2.85e-05	0.000100484
LOC_Os12g10070	7	33	0.335946	1.62033	2.26999	Up	2.85e-05	0.000100477
LOC_Os03g36720	7	33	0.335946	1.62033	2.26999	Up	2.85e-05	0.000100471
LOC_Os08g39640	7	33	0.335946	1.62033	2.26999	Up	2.85e-05	0.000100464
LOC_Os01g02670	7	33	0.335946	1.62033	2.26999	Up	2.85e-05	0.000100458
LOC_Os04g50000	7	33	0.335946	1.62033	2.26999	Up	2.85e-05	0.000100451
LOC_Os02g19320	7	33	0.335946	1.62033	2.26999	Up	2.85e-05	0.000100445
LOC_Os08g04040	7	33	0.335946	1.62033	2.26999	Up	2.85e-05	0.000100438
LOC_Os09g12320	7	33	0.335946	1.62033	2.26999	Up	2.85e-05	0.000100432
LOC_Os12g03580	7	33	0.335946	1.62033	2.26999	Up	2.85e-05	0.000100425
LOC_Os03g55094	10	47	0.479923	2.30775	2.26561	Up	2.1e-06	8.85e-06
LOC_Os08g35260	6	28	0.287954	1.37483	2.25534	Up	0.0001065	0.000324637
LOC_Os02g19490	6	28	0.287954	1.37483	2.25534	Up	0.0001065	0.000324619
LOC_Os02g16110	6	28	0.287954	1.37483	2.25534	Up	0.0001065	0.0003246
LOC_Os09g33590	6	28	0.287954	1.37483	2.25534	Up	0.0001065	0.000324582
LOC_Os04g19340	6	28	0.287954	1.37483	2.25534	Up	0.0001065	0.000324564
LOC_Os05g20080	6	28	0.287954	1.37483	2.25534	Up	0.0001065	0.000324546
LOC_Os09g11540	6	28	0.287954	1.37483	2.25534	Up	0.0001065	0.000324528
LOC_Os11g06660	6	28	0.287954	1.37483	2.25534	Up	0.0001065	0.000324509
LOC_Os11g11420	6	28	0.287954	1.37483	2.25534	Up	0.0001065	0.000324491
LOC_Os02g34100	6	28	0.287954	1.37483	2.25534	Up	0.0001065	0.000324473
LOC_Os03g22860	6	28	0.287954	1.37483	2.25534	Up	0.0001065	0.000324455
LOC_Os07g05590	6	28	0.287954	1.37483	2.25534	Up	0.0001065	0.000324437
LOC_Os07g18040	6	28	0.287954	1.37483	2.25534	Up	0.0001065	0.000324419
LOC_Os10g18750	6	28	0.287954	1.37483	2.25534	Up	0.0001065	0.0003244
LOC_Os08g10240	6	28	0.287954	1.37483	2.25534	Up	0.0001065	0.000324382
LOC_Os12g18570	6	28	0.287954	1.37483	2.25534	Up	0.0001065	0.000324364
LOC_Os06g13360	6	28	0.287954	1.37483	2.25534	Up	0.0001065	0.000324346
LOC_Os04g40810	6	28	0.287954	1.37483	2.25534	Up	0.0001065	0.000324328
LOC_Os12g32160	6	28	0.287954	1.37483	2.25534	Up	0.0001065	0.00032431
LOC_Os12g17390	6	28	0.287954	1.37483	2.25534	Up	0.0001065	0.000324291
LOC_Os02g25710	6	28	0.287954	1.37483	2.25534	Up	0.0001065	0.000324273
LOC_Os04g09690	6	28	0.287954	1.37483	2.25534	Up	0.0001065	0.000324255
LOC_Os04g15510	6	28	0.287954	1.37483	2.25534	Up	0.0001065	0.000324237
LOC_Os01g20870	6	28	0.287954	1.37483	2.25534	Up	0.0001065	0.000324219
LOC_Os03g05670	6	28	0.287954	1.37483	2.25534	Up	0.0001065	0.000324201
LOC_Os03g18050	6	28	0.287954	1.37483	2.25534	Up	0.0001065	0.000324183
LOC_Os10g17840	6	28	0.287954	1.37483	2.25534	Up	0.0001065	0.000324164
LOC_Os07g29300	6	28	0.287954	1.37483	2.25534	Up	0.0001065	0.000324146
LOC_Os09g29550	6	28	0.287954	1.37483	2.25534	Up	0.0001065	0.000324128
LOC_Os05g28610	6	28	0.287954	1.37483	2.25534	Up	0.0001065	0.00032411
LOC_Os01g27570	6	28	0.287954	1.37483	2.25534	Up	0.0001065	0.000324092
LOC_Os03g39310	6	28	0.287954	1.37483	2.25534	Up	0.0001065	0.000324074
LOC_Os05g24750	6	28	0.287954	1.37483	2.25534	Up	0.0001065	0.000324056
LOC_Os04g28740	6	28	0.287954	1.37483	2.25534	Up	0.0001065	0.000324038
LOC_Os09g20610	6	28	0.287954	1.37483	2.25534	Up	0.0001065	0.000324019
LOC_Os07g21970	6	28	0.287954	1.37483	2.25534	Up	0.0001065	0.000324001
LOC_Os11g17670	6	28	0.287954	1.37483	2.25534	Up	0.0001065	0.000323983
LOC_Os02g18300	6	28	0.287954	1.37483	2.25534	Up	0.0001065	0.000323965
LOC_Os12g33840	6	28	0.287954	1.37483	2.25534	Up	0.0001065	0.000323947
LOC_Os01g45010	6	28	0.287954	1.37483	2.25534	Up	0.0001065	0.000323929
LOC_Os07g11720	6	28	0.287954	1.37483	2.25534	Up	0.0001065	0.000323911
LOC_Os03g21759	6	28	0.287954	1.37483	2.25534	Up	0.0001065	0.000323893
LOC_Os10g39084	6	28	0.287954	1.37483	2.25534	Up	0.0001065	0.000323875
LOC_Os05g18210	6	28	0.287954	1.37483	2.25534	Up	0.0001065	0.000323856
LOC_Os01g15080	6	28	0.287954	1.37483	2.25534	Up	0.0001065	0.000323838
LOC_Os09g04930	6	28	0.287954	1.37483	2.25534	Up	0.0001065	0.00032382
LOC_Os08g29180	6	28	0.287954	1.37483	2.25534	Up	0.0001065	0.000323802
LOC_Os03g34290	6	28	0.287954	1.37483	2.25534	Up	0.0001065	0.000323784
LOC_Os07g24760	9	42	0.43193	2.06224	2.25534	Up	4.6e-06	1.86e-05
LOC_Os07g33800	9	42	0.43193	2.06224	2.25534	Up	4.6e-06	1.86e-05
LOC_Os09g13810	9	42	0.43193	2.06224	2.25534	Up	4.6e-06	1.86e-05
LOC_Os04g58270	9	42	0.43193	2.06224	2.25534	Up	4.6e-06	1.86e-05
LOC_Os01g54490	9	42	0.43193	2.06224	2.25534	Up	4.6e-06	1.86e-05
LOC_Os02g19070	9	42	0.43193	2.06224	2.25534	Up	4.6e-06	1.86e-05
LOC_Os12g33956	14	65	0.671892	3.19156	2.24796	Up	1.66e-07	7.99e-07
LOC_Os03g22930	8	37	0.383938	1.81674	2.2424	Up	1.22e-05	4.64e-05
LOC_Os03g51570	8	37	0.383938	1.81674	2.2424	Up	1.22e-05	4.64e-05
LOC_Os06g39320	8	37	0.383938	1.81674	2.2424	Up	1.22e-05	4.64e-05
LOC_Os11g32530	8	37	0.383938	1.81674	2.2424	Up	1.22e-05	4.64e-05
LOC_Os02g04880	8	37	0.383938	1.81674	2.2424	Up	1.22e-05	4.64e-05
LOC_Os07g15690	8	37	0.383938	1.81674	2.2424	Up	1.22e-05	4.63e-05
LOC_Os06g51440	8	37	0.383938	1.81674	2.2424	Up	1.22e-05	4.63e-05
LOC_Os06g46650	8	37	0.383938	1.81674	2.2424	Up	1.22e-05	4.63e-05
LOC_Os06g04060	8	37	0.383938	1.81674	2.2424	Up	1.22e-05	4.63e-05
LOC_Os11g04960	8	37	0.383938	1.81674	2.2424	Up	1.22e-05	4.63e-05
LOC_Os03g33000	8	37	0.383938	1.81674	2.2424	Up	1.22e-05	4.63e-05
LOC_Os05g49850	8	37	0.383938	1.81674	2.2424	Up	1.22e-05	4.63e-05
LOC_Os01g23650	8	37	0.383938	1.81674	2.2424	Up	1.22e-05	4.63e-05
LOC_Os11g09780	8	37	0.383938	1.81674	2.2424	Up	1.22e-05	4.63e-05
LOC_Os10g31540	8	37	0.383938	1.81674	2.2424	Up	1.22e-05	4.63e-05
LOC_Os08g13560	8	37	0.383938	1.81674	2.2424	Up	1.22e-05	4.63e-05
LOC_Os04g41980	10	46	0.479923	2.25865	2.23458	Up	2.29e-06	9.64e-06
LOC_Os08g36650	10	46	0.479923	2.25865	2.23458	Up	2.29e-06	9.64e-06
LOC_Os12g34094	12	55	0.575907	2.70055	2.22935	Up	5.88e-07	2.66e-06
LOC_Os09g24620	12	55	0.575907	2.70055	2.22935	Up	5.88e-07	2.66e-06
LOC_Os04g08520	7	32	0.335946	1.57123	2.2256	Up	4.12e-05	0.000140137
LOC_Os12g13240	7	32	0.335946	1.57123	2.2256	Up	4.12e-05	0.000140128
LOC_Os11g24470	7	32	0.335946	1.57123	2.2256	Up	4.12e-05	0.000140119
LOC_Os04g59080	7	32	0.335946	1.57123	2.2256	Up	4.12e-05	0.00014011
LOC_Os03g36070	7	32	0.335946	1.57123	2.2256	Up	4.12e-05	0.000140102
LOC_Os01g17080	7	32	0.335946	1.57123	2.2256	Up	4.12e-05	0.000140093
LOC_Os05g07230	7	32	0.335946	1.57123	2.2256	Up	4.12e-05	0.000140084
LOC_Os06g27370	7	32	0.335946	1.57123	2.2256	Up	4.12e-05	0.000140075
LOC_Os05g39040	7	32	0.335946	1.57123	2.2256	Up	4.12e-05	0.000140067
LOC_Os04g09270	7	32	0.335946	1.57123	2.2256	Up	4.12e-05	0.000140058
LOC_Os07g11090	7	32	0.335946	1.57123	2.2256	Up	4.12e-05	0.000140049
LOC_Os02g28560	7	32	0.335946	1.57123	2.2256	Up	4.12e-05	0.00014004
LOC_Os06g14920	7	32	0.335946	1.57123	2.2256	Up	4.12e-05	0.000140032
LOC_Os01g34580	7	32	0.335946	1.57123	2.2256	Up	4.12e-05	0.000140023
LOC_Os11g37960	7	32	0.335946	1.57123	2.2256	Up	4.12e-05	0.000140014
LOC_Os06g41160	7	32	0.335946	1.57123	2.2256	Up	4.12e-05	0.000140005
LOC_Os09g24270	7	32	0.335946	1.57123	2.2256	Up	4.12e-05	0.000139997
LOC_Os12g20440	7	32	0.335946	1.57123	2.2256	Up	4.12e-05	0.000139988
LOC_Os05g27910	7	32	0.335946	1.57123	2.2256	Up	4.12e-05	0.000139979
LOC_Os03g48730	7	32	0.335946	1.57123	2.2256	Up	4.12e-05	0.00013997
LOC_Os11g10170	7	32	0.335946	1.57123	2.2256	Up	4.12e-05	0.000139962
LOC_Os07g08480	7	32	0.335946	1.57123	2.2256	Up	4.12e-05	0.000139953
LOC_Os06g42780	7	32	0.335946	1.57123	2.2256	Up	4.12e-05	0.000139944
LOC_Os10g04410	7	32	0.335946	1.57123	2.2256	Up	4.12e-05	0.000139935
LOC_Os05g16040	7	32	0.335946	1.57123	2.2256	Up	4.12e-05	0.000139927
LOC_Os08g33240	7	32	0.335946	1.57123	2.2256	Up	4.12e-05	0.000139918
LOC_Os02g20710	7	32	0.335946	1.57123	2.2256	Up	4.12e-05	0.000139909
LOC_Os04g51480	7	32	0.335946	1.57123	2.2256	Up	4.12e-05	0.0001399
LOC_Os02g34330	7	32	0.335946	1.57123	2.2256	Up	4.12e-05	0.000139892
LOC_Os09g12850	7	32	0.335946	1.57123	2.2256	Up	4.12e-05	0.000139883
LOC_Os07g48380	7	32	0.335946	1.57123	2.2256	Up	4.12e-05	0.000139874
LOC_Os04g01010	7	32	0.335946	1.57123	2.2256	Up	4.12e-05	0.000139866
LOC_Os07g10430	7	32	0.335946	1.57123	2.2256	Up	4.12e-05	0.000139857
LOC_Os01g37160	7	32	0.335946	1.57123	2.2256	Up	4.12e-05	0.000139848
LOC_Os08g19870	7	32	0.335946	1.57123	2.2256	Up	4.12e-05	0.000139839
LOC_Os05g35210	7	32	0.335946	1.57123	2.2256	Up	4.12e-05	0.000139831
LOC_Os03g46840	9	41	0.43193	2.01314	2.22058	Up	5.54e-06	2.21e-05
LOC_Os08g31190	9	41	0.43193	2.01314	2.22058	Up	5.54e-06	2.21e-05
LOC_Os11g13459	9	41	0.43193	2.01314	2.22058	Up	5.54e-06	2.21e-05
LOC_Os01g55630	9	41	0.43193	2.01314	2.22058	Up	5.54e-06	2.21e-05
LOC_Os01g09330	9	41	0.43193	2.01314	2.22058	Up	5.54e-06	2.21e-05
LOC_Os01g25730	9	41	0.43193	2.01314	2.22058	Up	5.54e-06	2.21e-05
LOC_Os11g30880	9	41	0.43193	2.01314	2.22058	Up	5.54e-06	2.21e-05
LOC_Os08g20670	9	41	0.43193	2.01314	2.22058	Up	5.54e-06	2.21e-05
LOC_Os10g42590	9	41	0.43193	2.01314	2.22058	Up	5.54e-06	2.21e-05
LOC_Os03g02470	9	41	0.43193	2.01314	2.22058	Up	5.54e-06	2.21e-05
LOC_Os02g43680	9	41	0.43193	2.01314	2.22058	Up	5.54e-06	2.21e-05
LOC_Os02g38870	9	41	0.43193	2.01314	2.22058	Up	5.54e-06	2.21e-05
LOC_Os02g37340	9	41	0.43193	2.01314	2.22058	Up	5.54e-06	2.21e-05
LOC_Os01g60480	11	50	0.527915	2.45505	2.21737	Up	1.18e-06	5.12e-06
LOC_Os02g26800	13	59	0.6239	2.89696	2.21515	Up	3.15e-07	1.47e-06
LOC_Os05g25914	17	77	0.815869	3.78078	2.21227	Up	2.6e-08	1.38e-07
LOC_Os10g13580	6	27	0.287954	1.32573	2.20288	Up	0.000167951	0.000486624
LOC_Os10g01870	6	27	0.287954	1.32573	2.20288	Up	0.000167951	0.000486598
LOC_Os06g12710	6	27	0.287954	1.32573	2.20288	Up	0.000167951	0.000486573
LOC_Os07g18640	6	27	0.287954	1.32573	2.20288	Up	0.000167951	0.000486547
LOC_Os06g02910	6	27	0.287954	1.32573	2.20288	Up	0.000167951	0.000486521
LOC_Os11g02910	6	27	0.287954	1.32573	2.20288	Up	0.000167951	0.000486495
LOC_Os04g30870	6	27	0.287954	1.32573	2.20288	Up	0.000167951	0.000486469
LOC_Os11g26640	6	27	0.287954	1.32573	2.20288	Up	0.000167951	0.000486443
LOC_Os01g59009	6	27	0.287954	1.32573	2.20288	Up	0.000167951	0.000486417
LOC_Os06g38170	6	27	0.287954	1.32573	2.20288	Up	0.000167951	0.000486391
LOC_Os11g38750	6	27	0.287954	1.32573	2.20288	Up	0.000167951	0.000486365
LOC_Os03g11630	6	27	0.287954	1.32573	2.20288	Up	0.000167951	0.000486339
LOC_Os04g28290	6	27	0.287954	1.32573	2.20288	Up	0.000167951	0.000486314
LOC_Os12g40210	6	27	0.287954	1.32573	2.20288	Up	0.000167951	0.000486288
LOC_Os05g13820	6	27	0.287954	1.32573	2.20288	Up	0.000167951	0.000486262
LOC_Os05g29040	6	27	0.287954	1.32573	2.20288	Up	0.000167951	0.000486236
LOC_Os02g55350	6	27	0.287954	1.32573	2.20288	Up	0.000167951	0.00048621
LOC_Os04g17010	6	27	0.287954	1.32573	2.20288	Up	0.000167951	0.000486184
LOC_Os01g35310	6	27	0.287954	1.32573	2.20288	Up	0.000167951	0.000486158
LOC_Os12g09780	6	27	0.287954	1.32573	2.20288	Up	0.000167951	0.000486132
LOC_Os03g03220	6	27	0.287954	1.32573	2.20288	Up	0.000167951	0.000486107
LOC_Os01g29040	6	27	0.287954	1.32573	2.20288	Up	0.000167951	0.000486081
LOC_Os06g17710	6	27	0.287954	1.32573	2.20288	Up	0.000167951	0.000486055
LOC_Os03g26704	6	27	0.287954	1.32573	2.20288	Up	0.000167951	0.000486029
LOC_Os11g31370	6	27	0.287954	1.32573	2.20288	Up	0.000167951	0.000486003
LOC_Os02g15040	6	27	0.287954	1.32573	2.20288	Up	0.000167951	0.000485977
LOC_Os04g26970	6	27	0.287954	1.32573	2.20288	Up	0.000167951	0.000485951
LOC_Os03g48364	6	27	0.287954	1.32573	2.20288	Up	0.000167951	0.000485926
LOC_Os04g19114	6	27	0.287954	1.32573	2.20288	Up	0.000167951	0.0004859
LOC_Os05g20780	6	27	0.287954	1.32573	2.20288	Up	0.000167951	0.000485874
LOC_Os08g22780	6	27	0.287954	1.32573	2.20288	Up	0.000167951	0.000485848
LOC_Os10g31370	6	27	0.287954	1.32573	2.20288	Up	0.000167951	0.000485822
LOC_Os11g11560	6	27	0.287954	1.32573	2.20288	Up	0.000167951	0.000485796
LOC_Os07g27720	6	27	0.287954	1.32573	2.20288	Up	0.000167951	0.000485771
LOC_Os08g03002	6	27	0.287954	1.32573	2.20288	Up	0.000167951	0.000485745
LOC_Os03g13890	6	27	0.287954	1.32573	2.20288	Up	0.000167951	0.000485719
LOC_Os04g13640	6	27	0.287954	1.32573	2.20288	Up	0.000167951	0.000485693
LOC_Os04g17574	6	27	0.287954	1.32573	2.20288	Up	0.000167951	0.000485667
LOC_Os02g29060	6	27	0.287954	1.32573	2.20288	Up	0.000167951	0.000485642
LOC_Os02g28320	6	27	0.287954	1.32573	2.20288	Up	0.000167951	0.000485616
LOC_Os11g05250	6	27	0.287954	1.32573	2.20288	Up	0.000167951	0.00048559
LOC_Os11g28710	6	27	0.287954	1.32573	2.20288	Up	0.000167951	0.000485564
LOC_Os03g41624	6	27	0.287954	1.32573	2.20288	Up	0.000167951	0.000485538
LOC_Os07g15820	6	27	0.287954	1.32573	2.20288	Up	0.000167951	0.000485512
LOC_Os06g44510	6	27	0.287954	1.32573	2.20288	Up	0.000167951	0.000485487
LOC_Os04g14420	6	27	0.287954	1.32573	2.20288	Up	0.000167951	0.000485461
LOC_Os01g27330	6	27	0.287954	1.32573	2.20288	Up	0.000167951	0.000485435
LOC_Os02g21180	6	27	0.287954	1.32573	2.20288	Up	0.000167951	0.000485409
LOC_Os07g29090	6	27	0.287954	1.32573	2.20288	Up	0.000167951	0.000485384
LOC_Os08g06180	10	45	0.479923	2.20954	2.20288	Up	2.62e-06	1.09e-05
LOC_Os10g38770	10	45	0.479923	2.20954	2.20288	Up	2.62e-06	1.09e-05
LOC_Os08g39230	10	45	0.479923	2.20954	2.20288	Up	2.62e-06	1.09e-05
LOC_Os10g37590	10	45	0.479923	2.20954	2.20288	Up	2.62e-06	1.09e-05
LOC_Os01g49860	10	45	0.479923	2.20954	2.20288	Up	2.62e-06	1.09e-05
LOC_Os04g55990	10	45	0.479923	2.20954	2.20288	Up	2.62e-06	1.09e-05
LOC_Os05g15910	10	45	0.479923	2.20954	2.20288	Up	2.62e-06	1.09e-05
LOC_Os11g32230	10	45	0.479923	2.20954	2.20288	Up	2.62e-06	1.09e-05
LOC_Os01g35640	8	36	0.383938	1.76764	2.20288	Up	1.67e-05	6.16e-05
LOC_Os01g19300	8	36	0.383938	1.76764	2.20288	Up	1.67e-05	6.16e-05
LOC_Os02g10930	8	36	0.383938	1.76764	2.20288	Up	1.67e-05	6.16e-05
LOC_Os12g14390	8	36	0.383938	1.76764	2.20288	Up	1.67e-05	6.16e-05
LOC_Os11g15290	8	36	0.383938	1.76764	2.20288	Up	1.67e-05	6.16e-05
LOC_Os05g06830	8	36	0.383938	1.76764	2.20288	Up	1.67e-05	6.16e-05
LOC_Os08g22830	8	36	0.383938	1.76764	2.20288	Up	1.67e-05	6.16e-05
LOC_Os04g47950	8	36	0.383938	1.76764	2.20288	Up	1.67e-05	6.16e-05
LOC_Os02g31060	8	36	0.383938	1.76764	2.20288	Up	1.67e-05	6.16e-05
LOC_Os06g46475	8	36	0.383938	1.76764	2.20288	Up	1.67e-05	6.16e-05
LOC_Os01g46910	8	36	0.383938	1.76764	2.20288	Up	1.67e-05	6.16e-05
LOC_Os08g23570	8	36	0.383938	1.76764	2.20288	Up	1.67e-05	6.16e-05
LOC_Os03g61770	8	36	0.383938	1.76764	2.20288	Up	1.67e-05	6.16e-05
[truncated: 2,842 more rows]
